# Supplementary material for: Annotation and Analysis of 3902 Odorant Receptor Protein Sequences from 21 Insect Species Provide Insights into the Evolution of Odorant Receptor Gene Families in Solitary and Social Insects
Source: MDPI journal article supplement (doi:10.3390/genes13050919), 2022-05-20

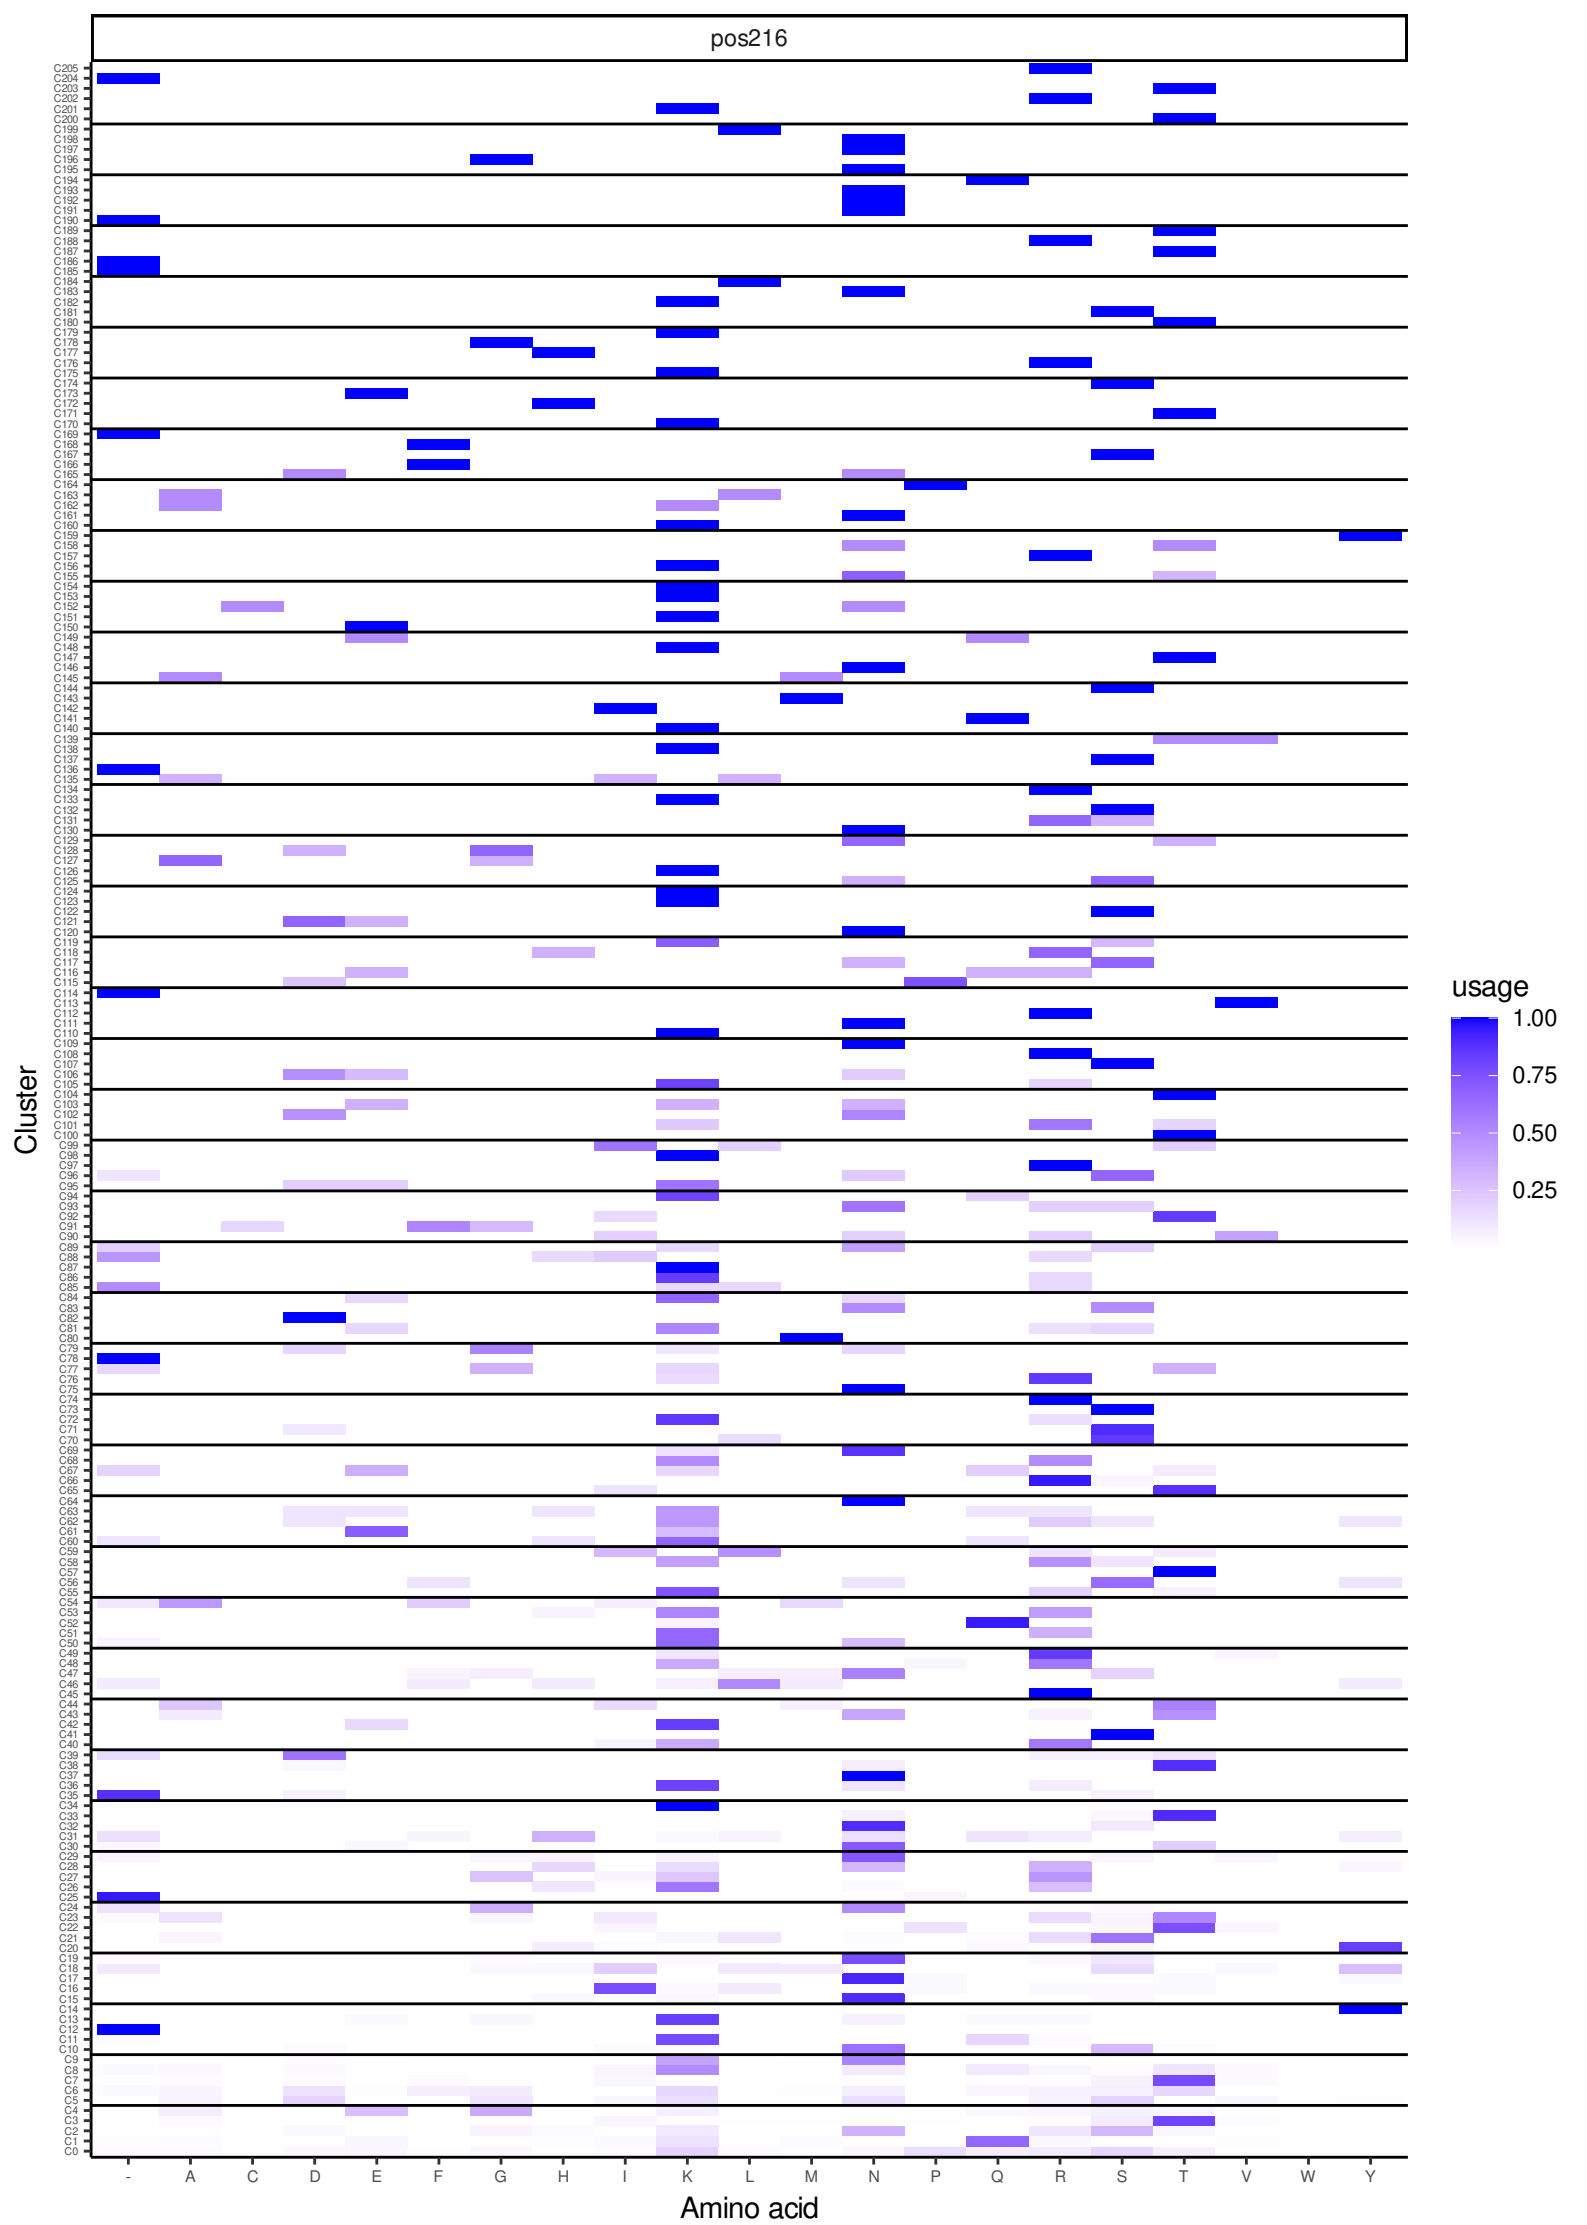

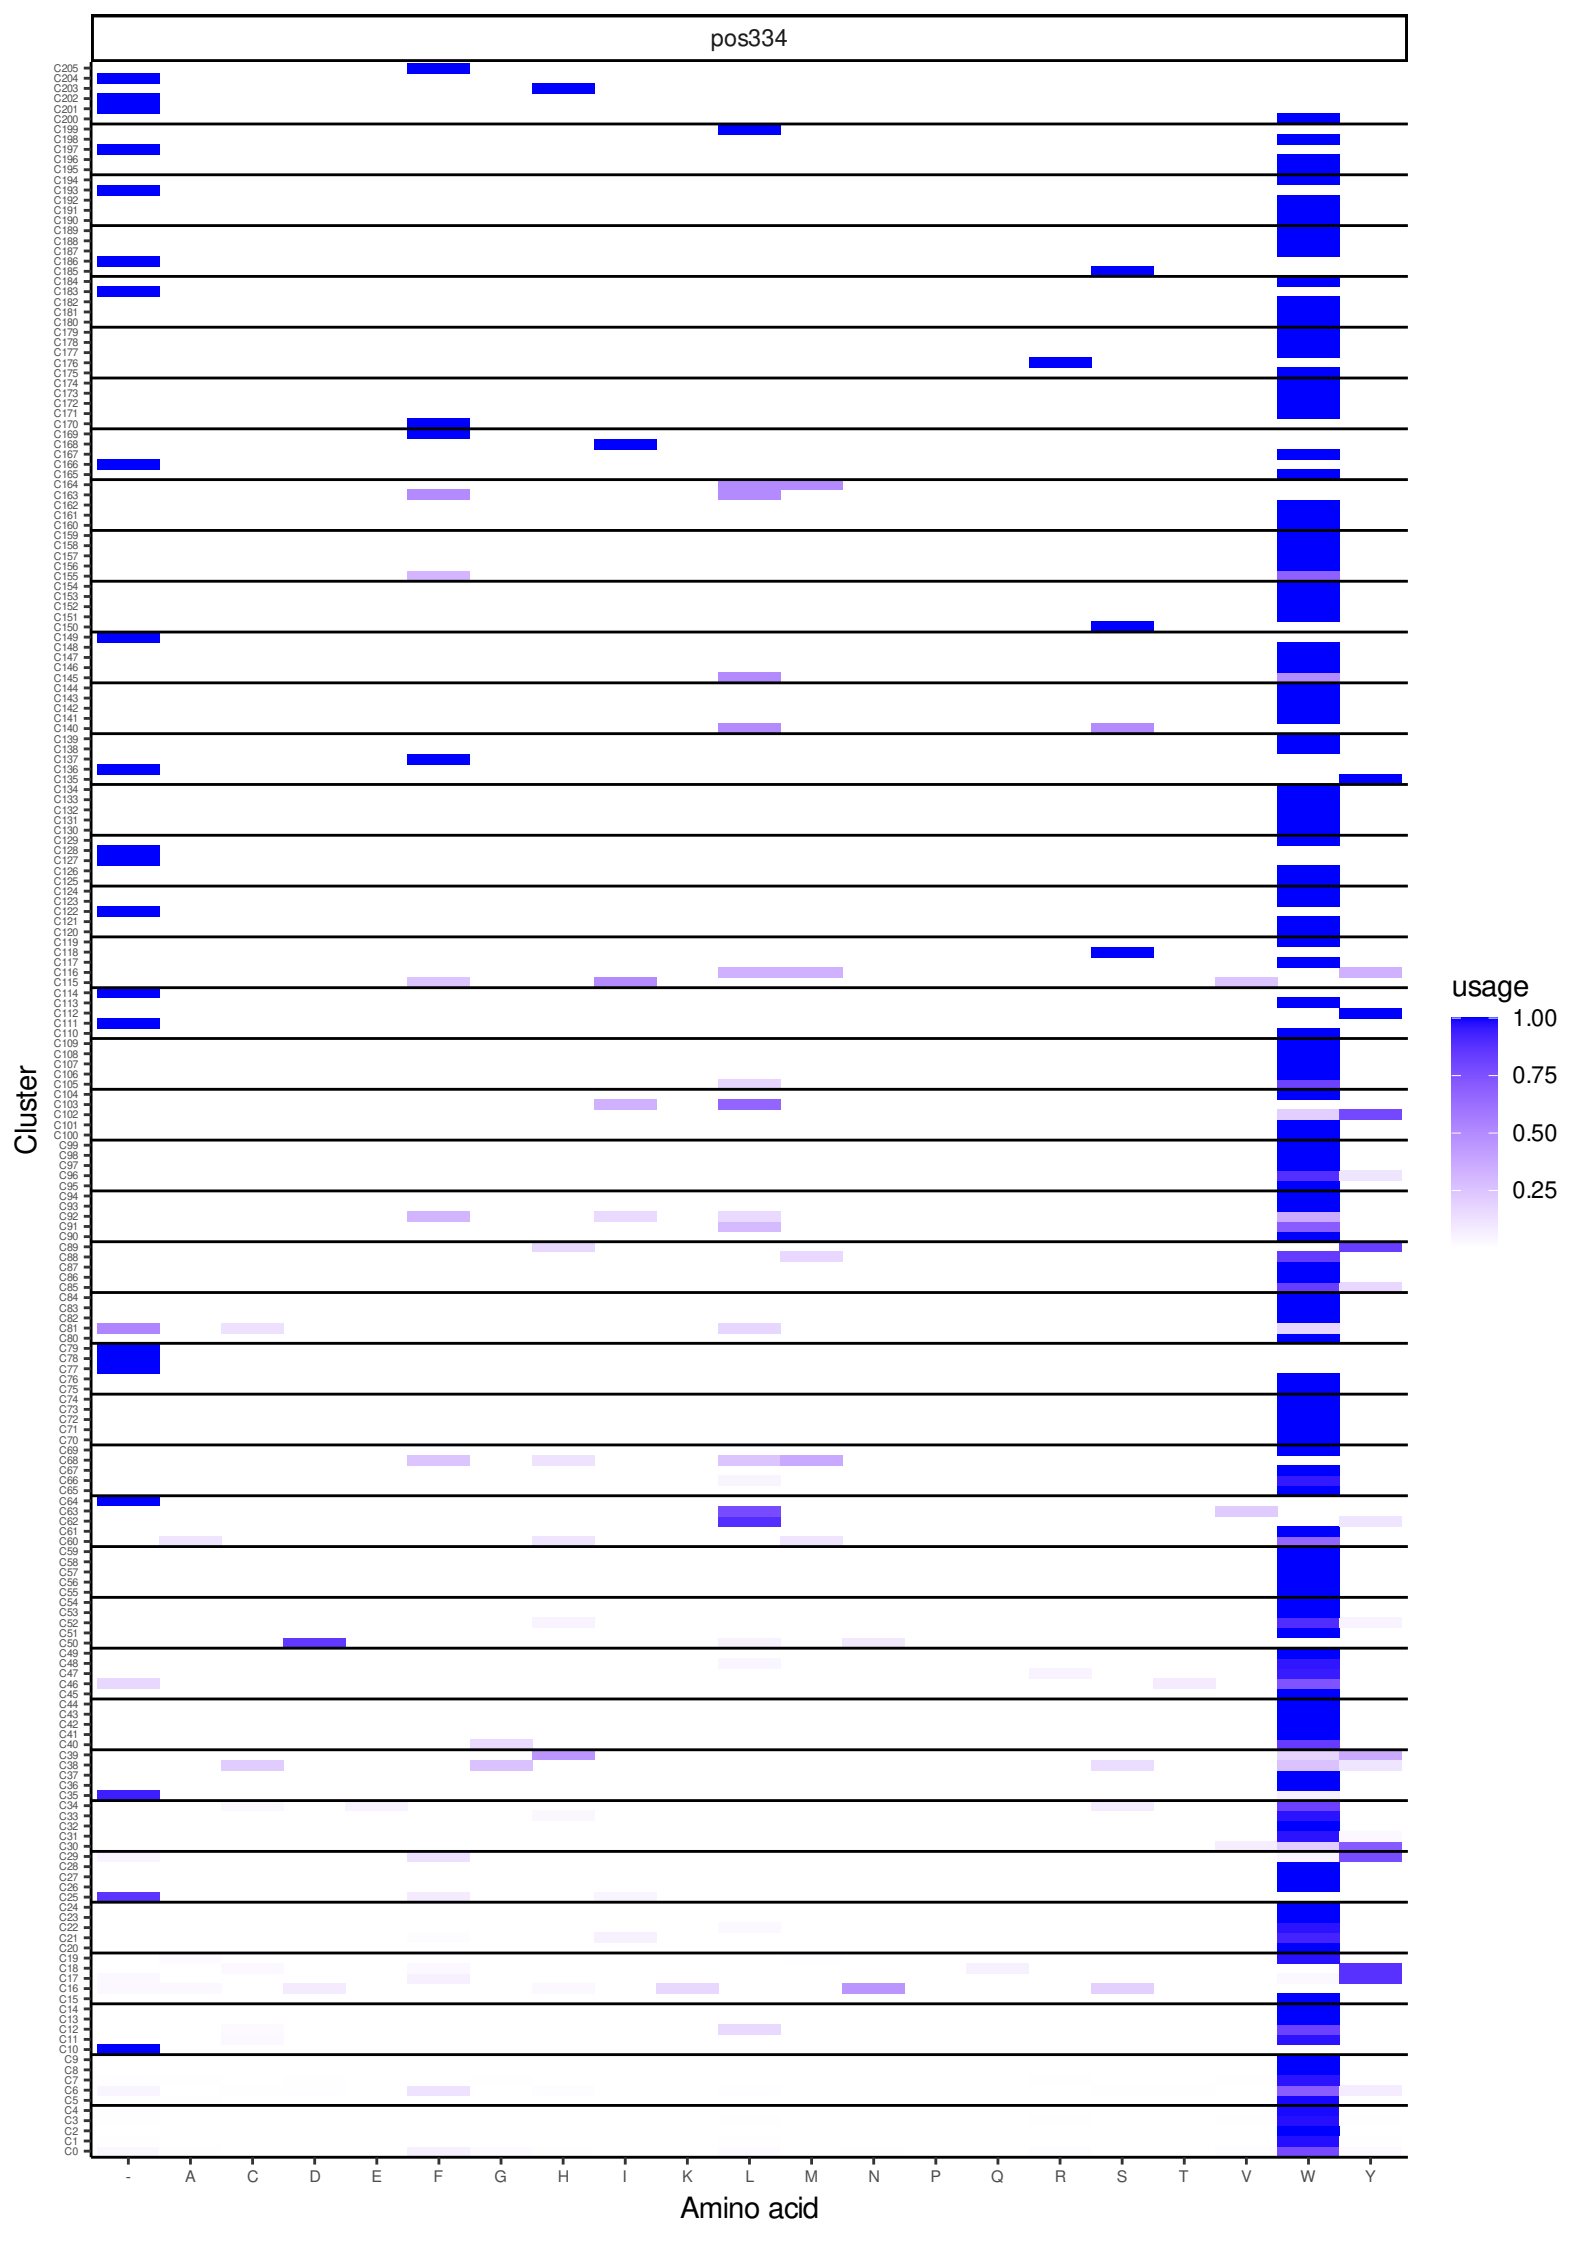

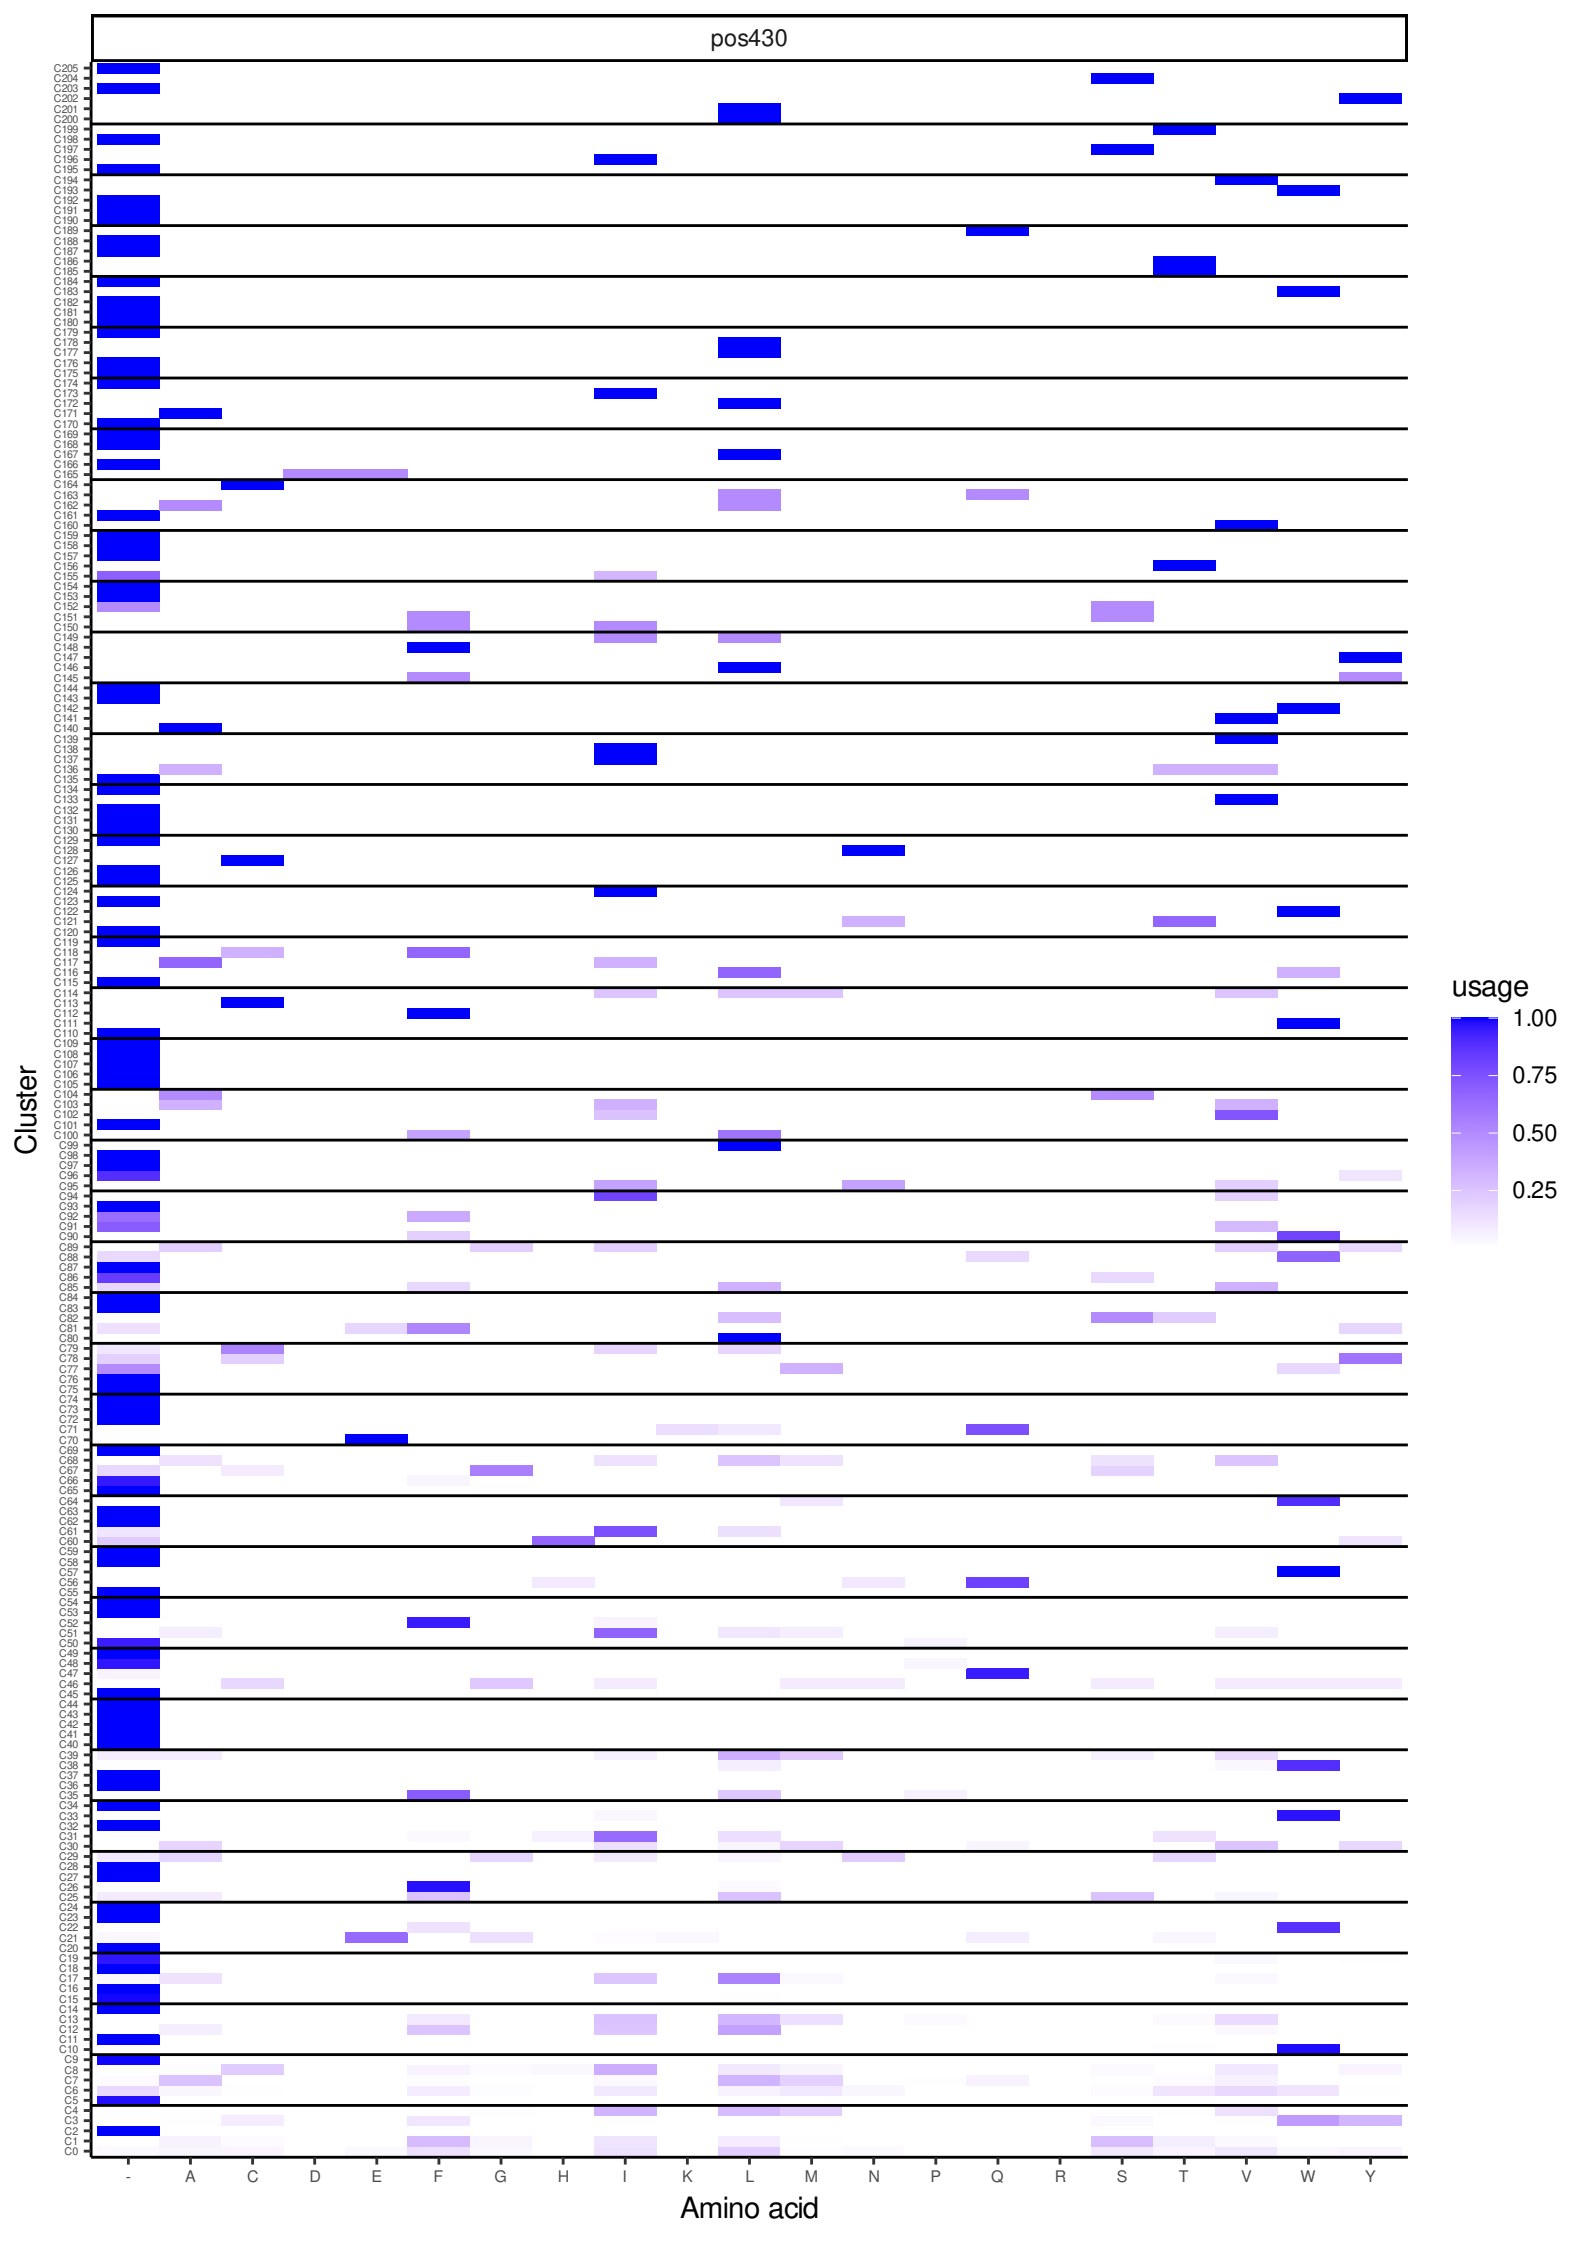

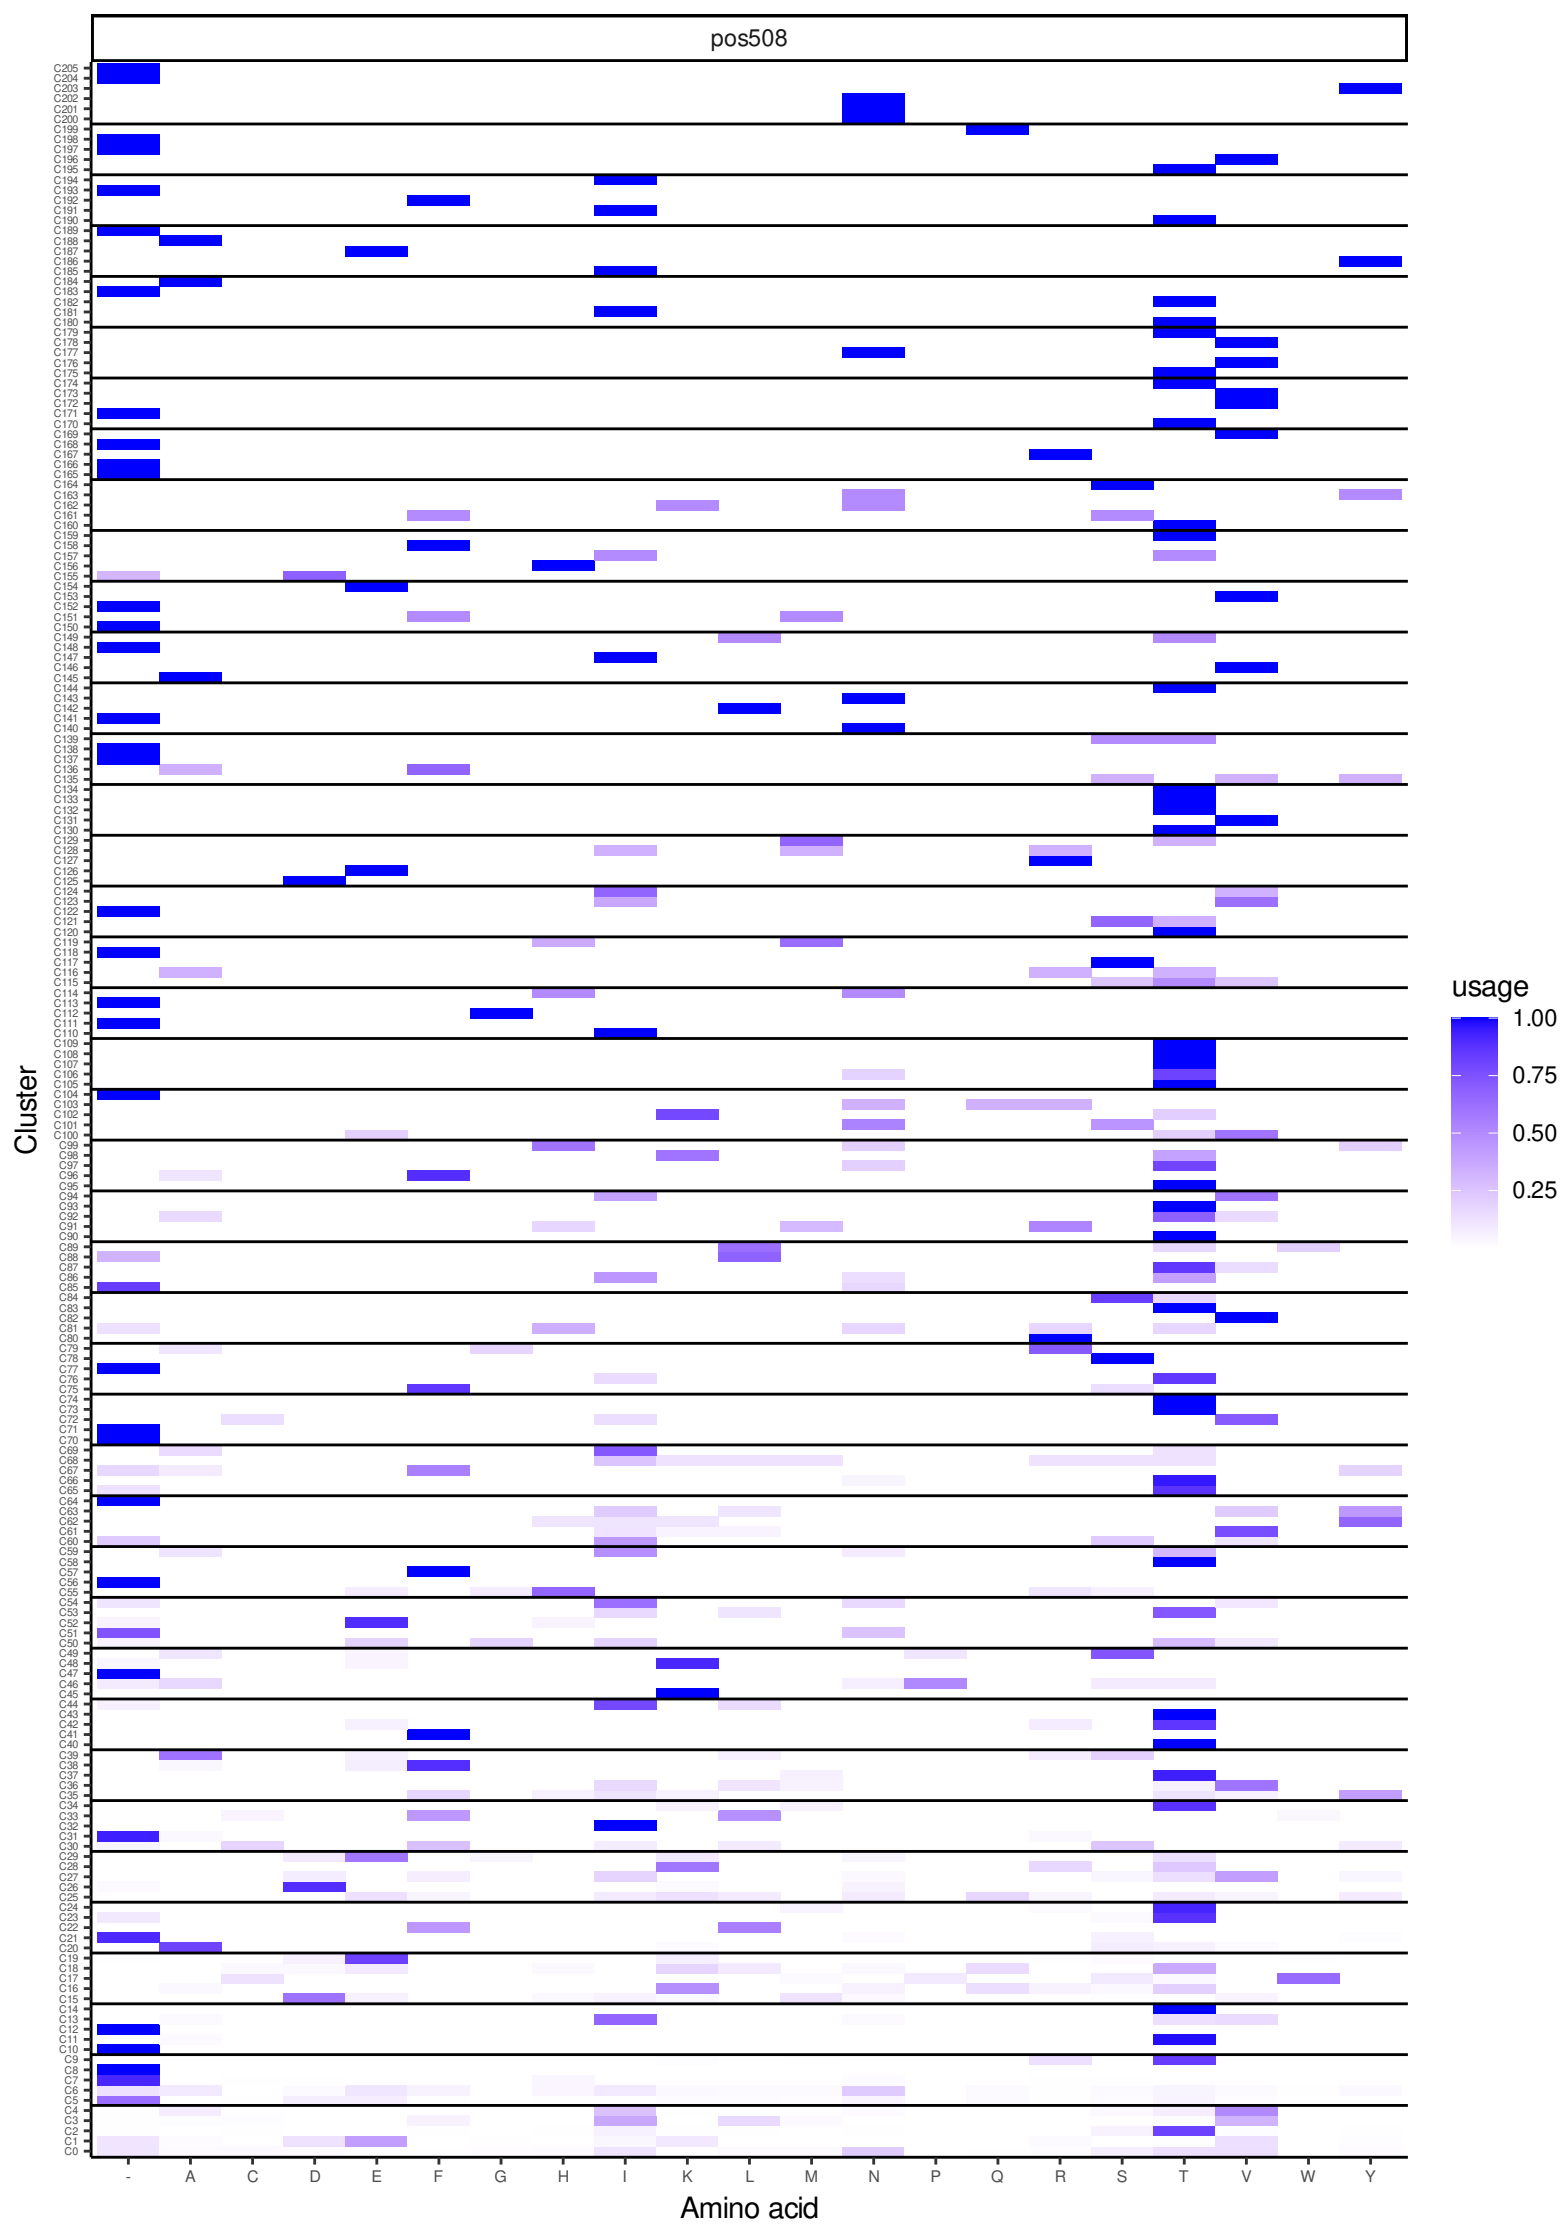

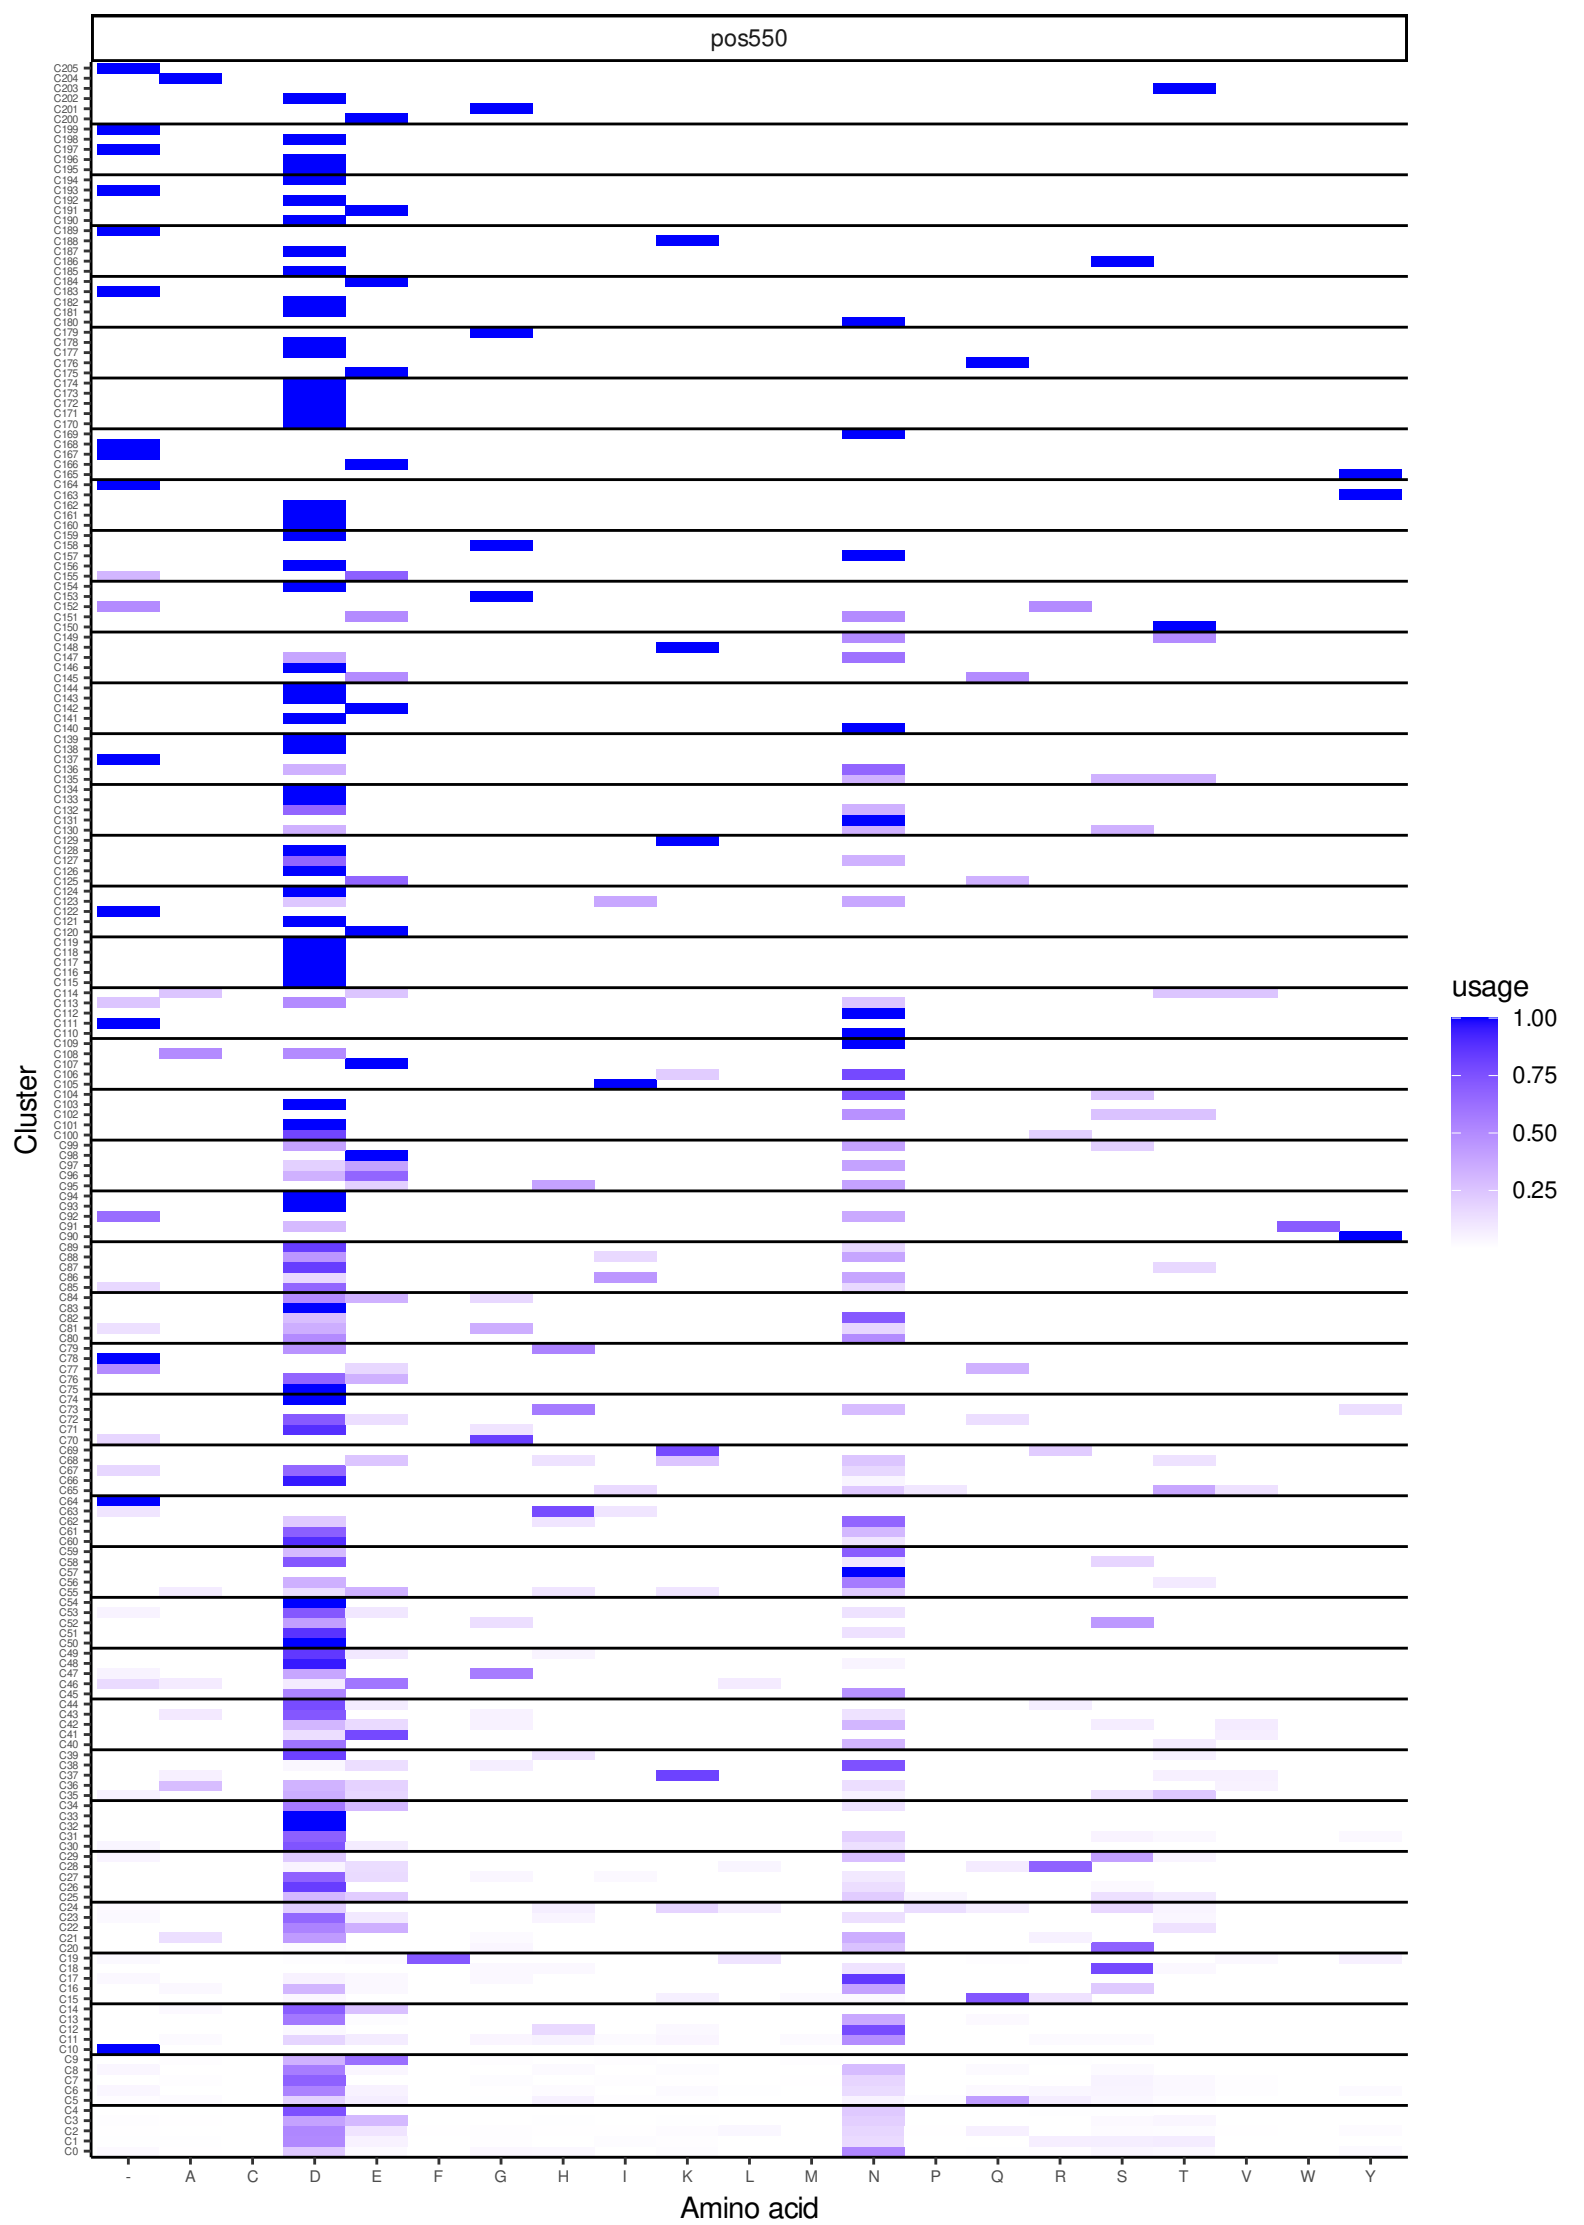

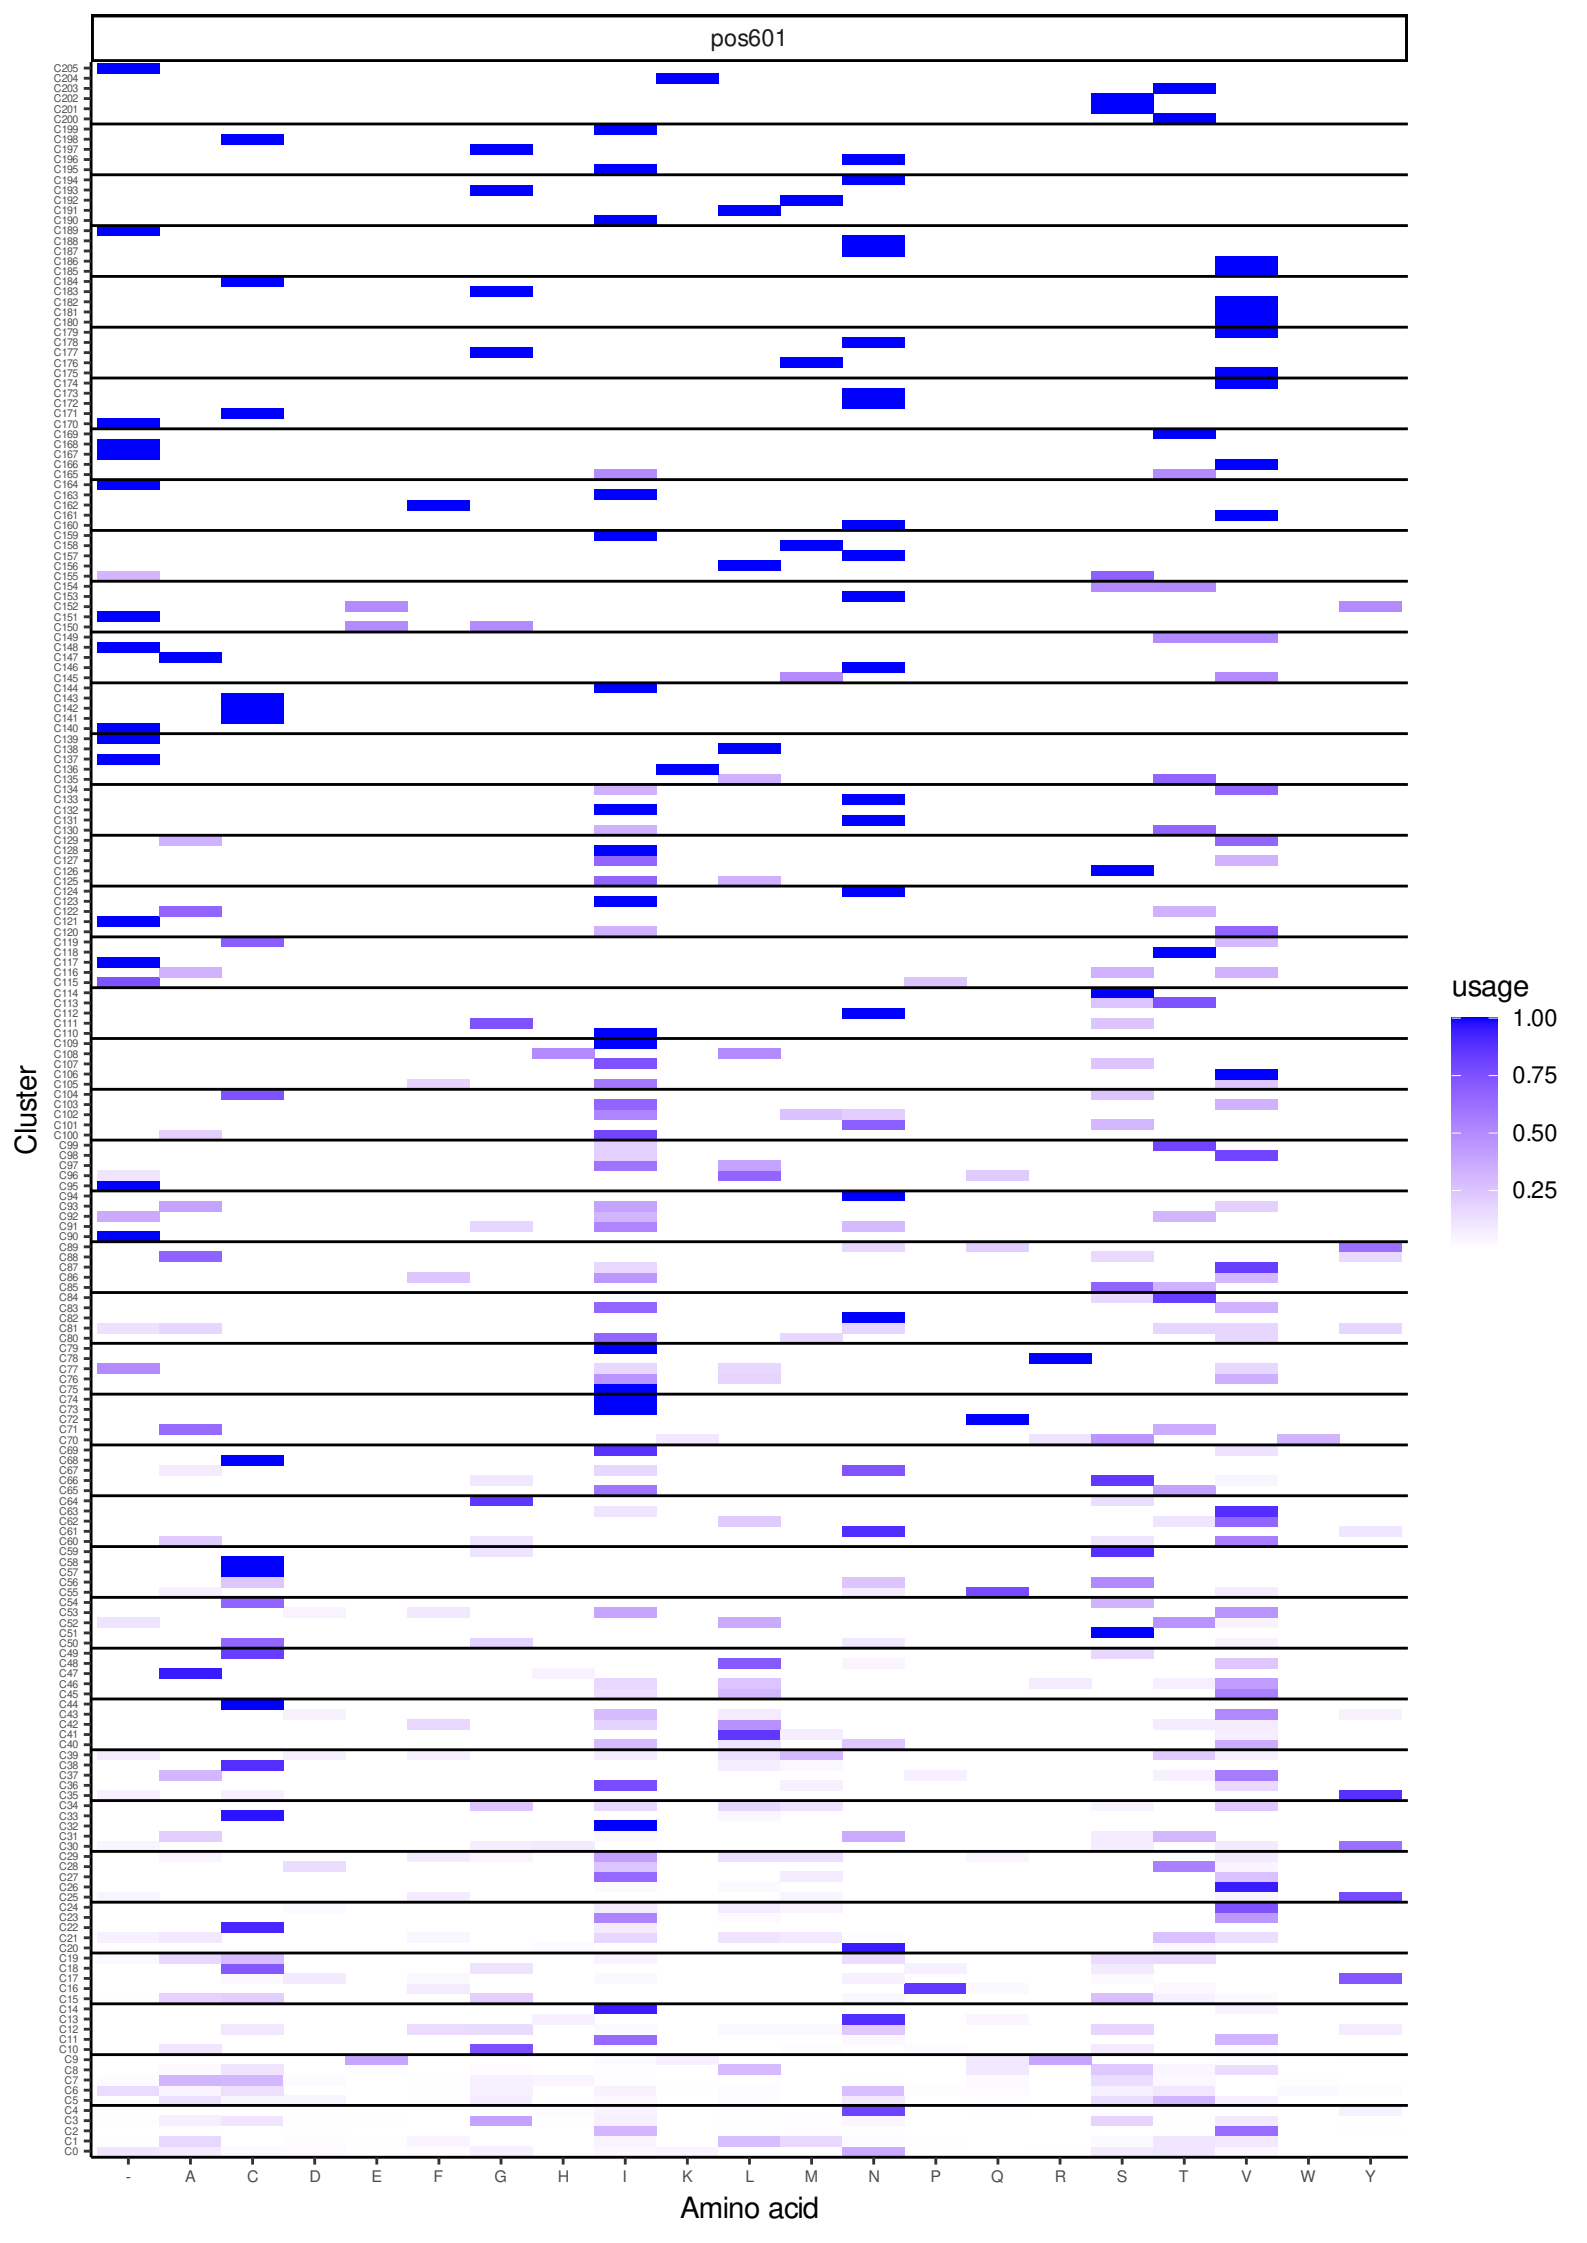

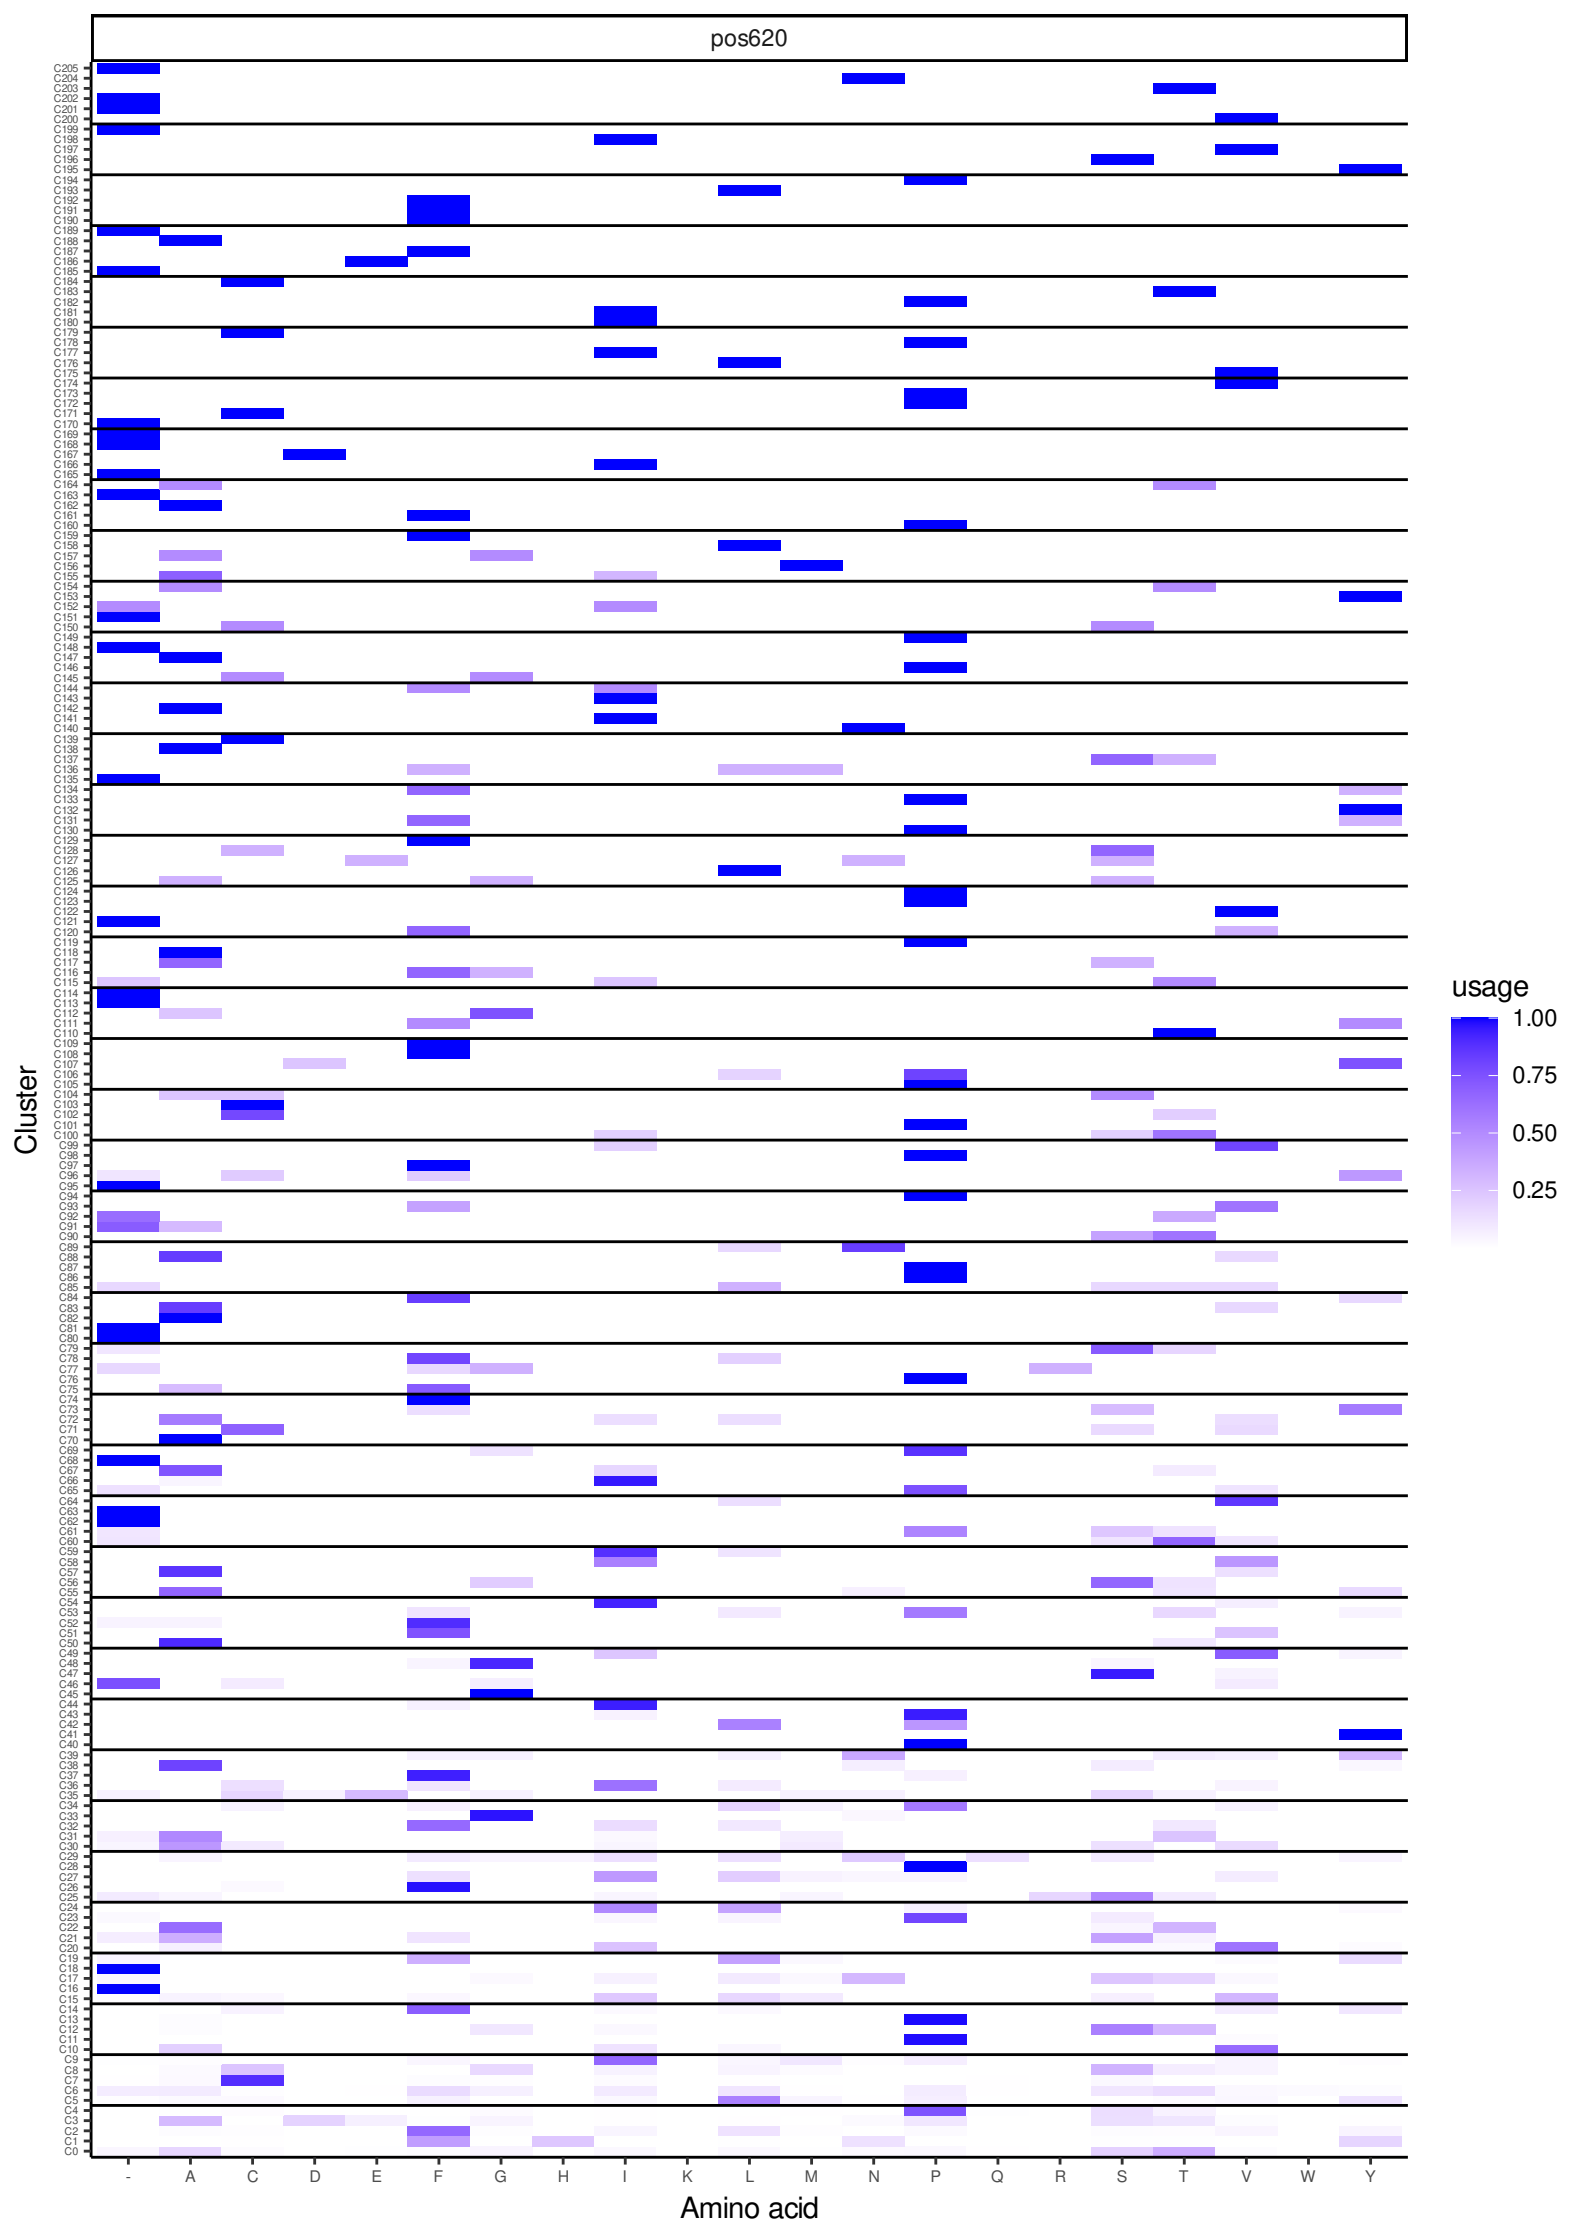

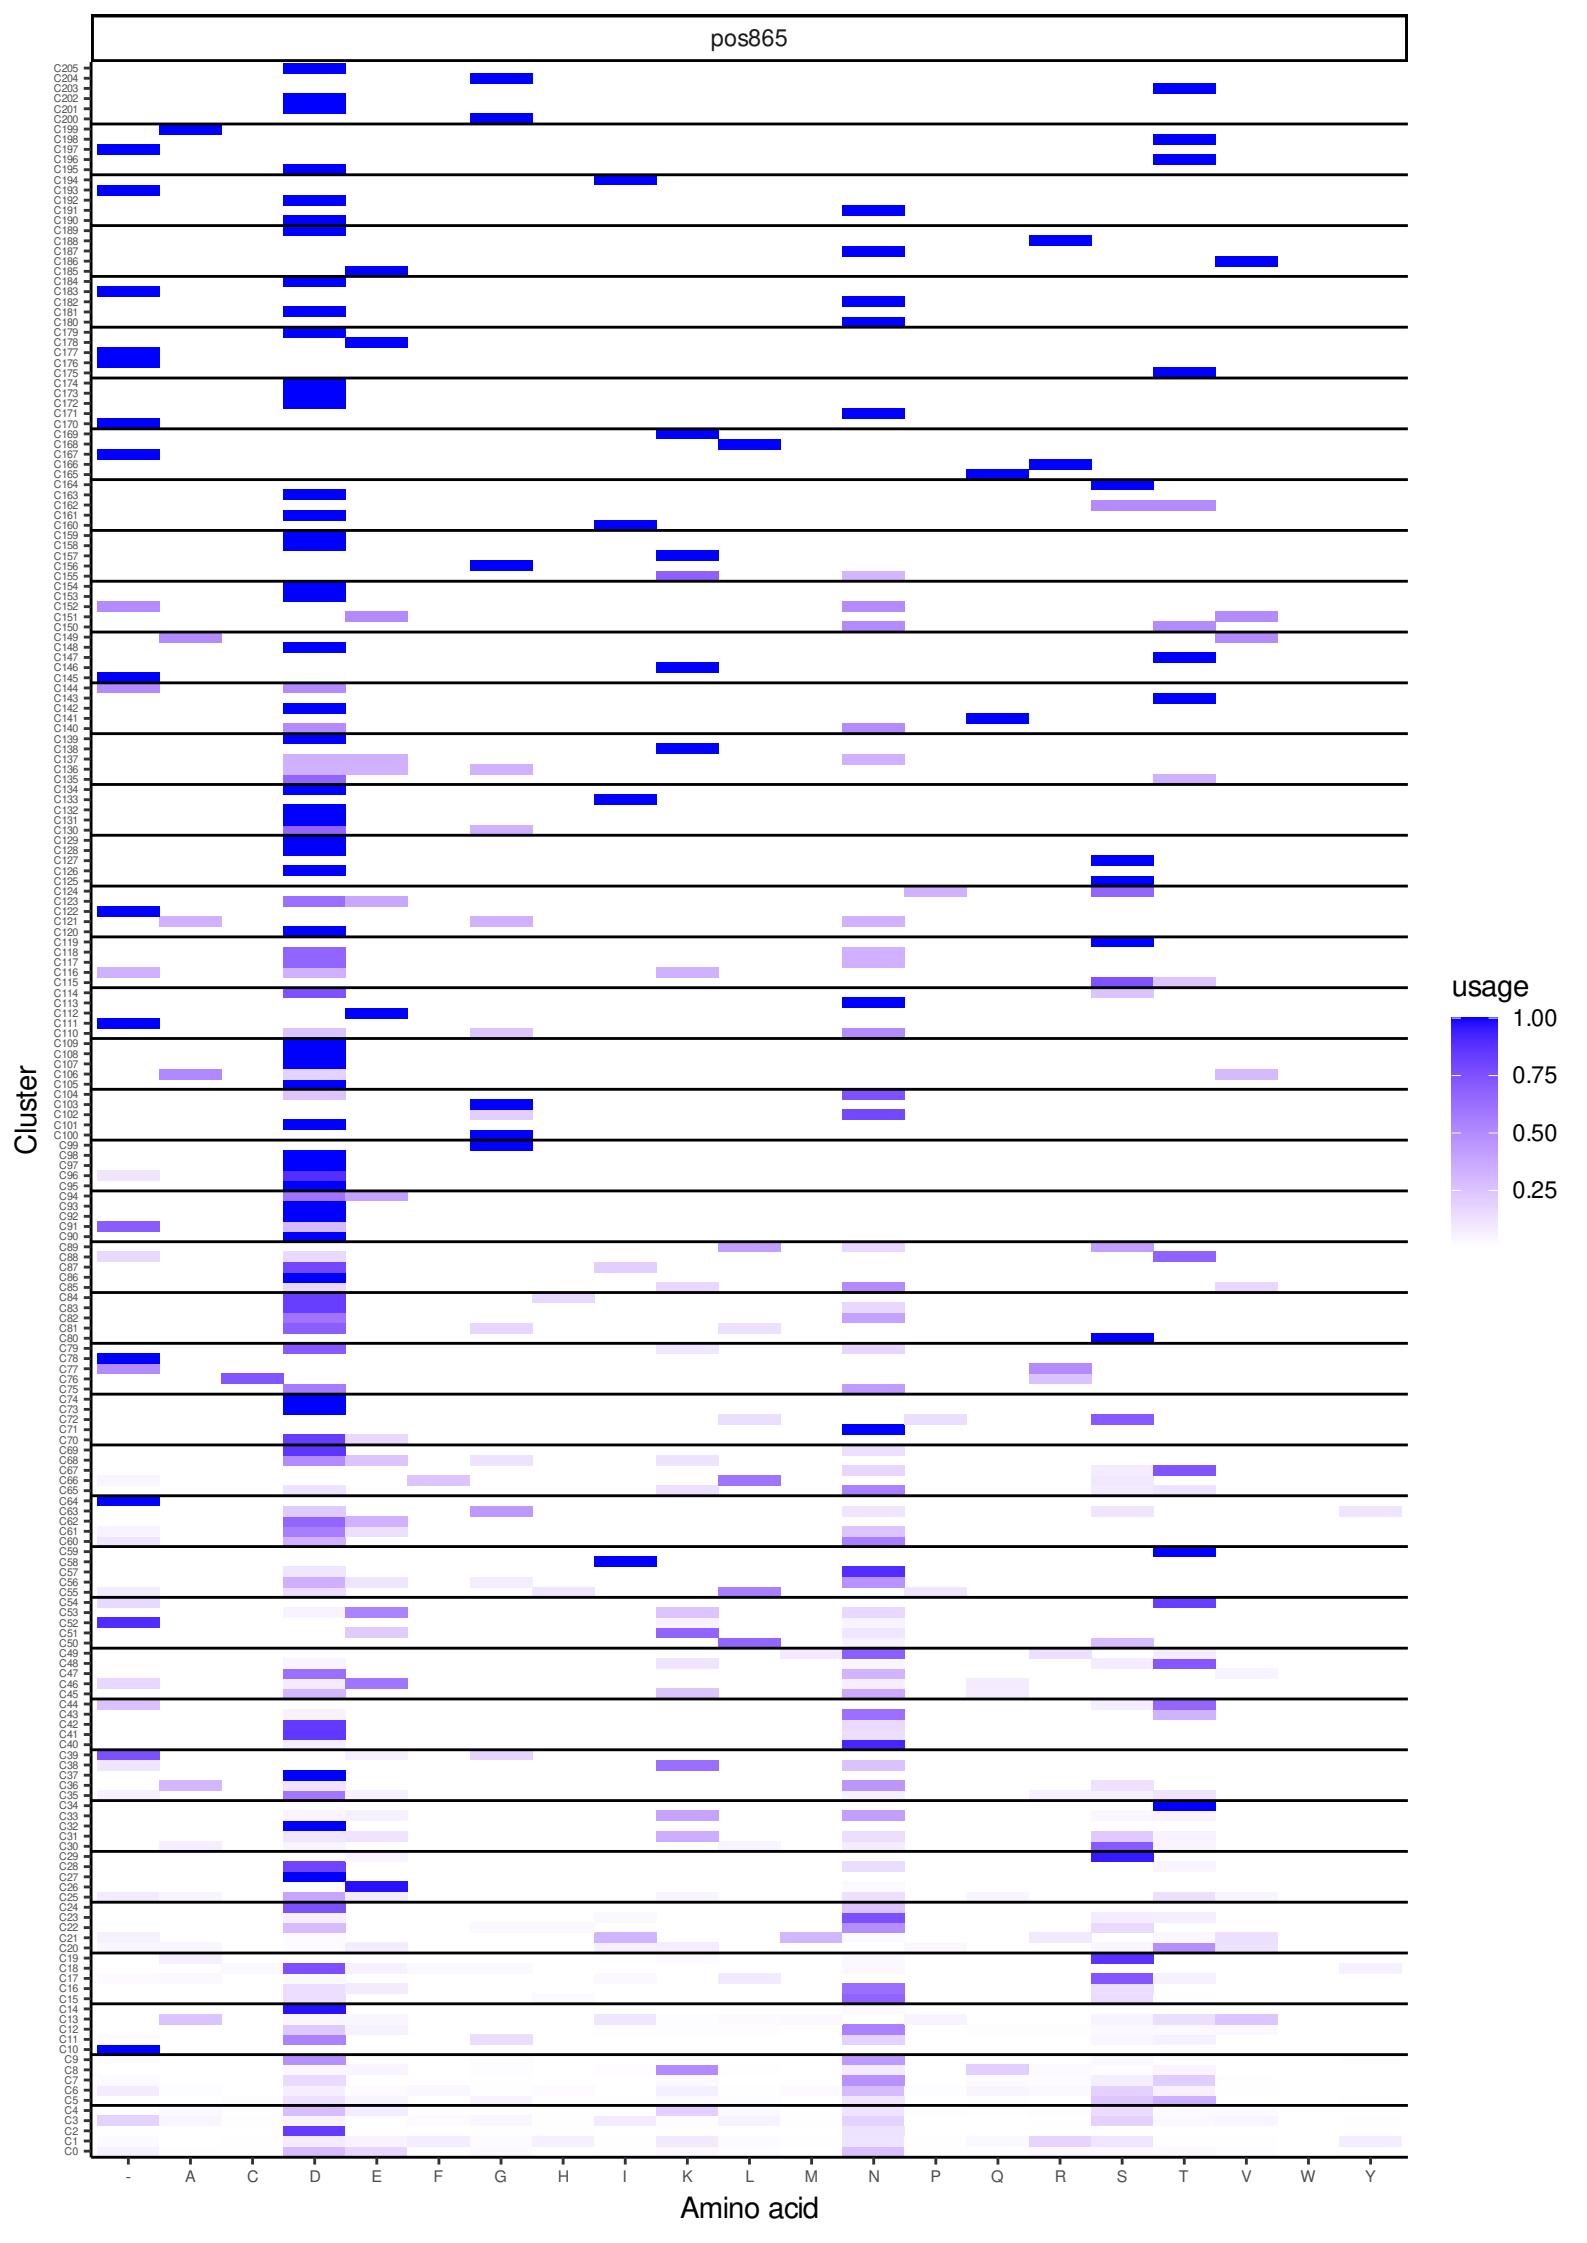



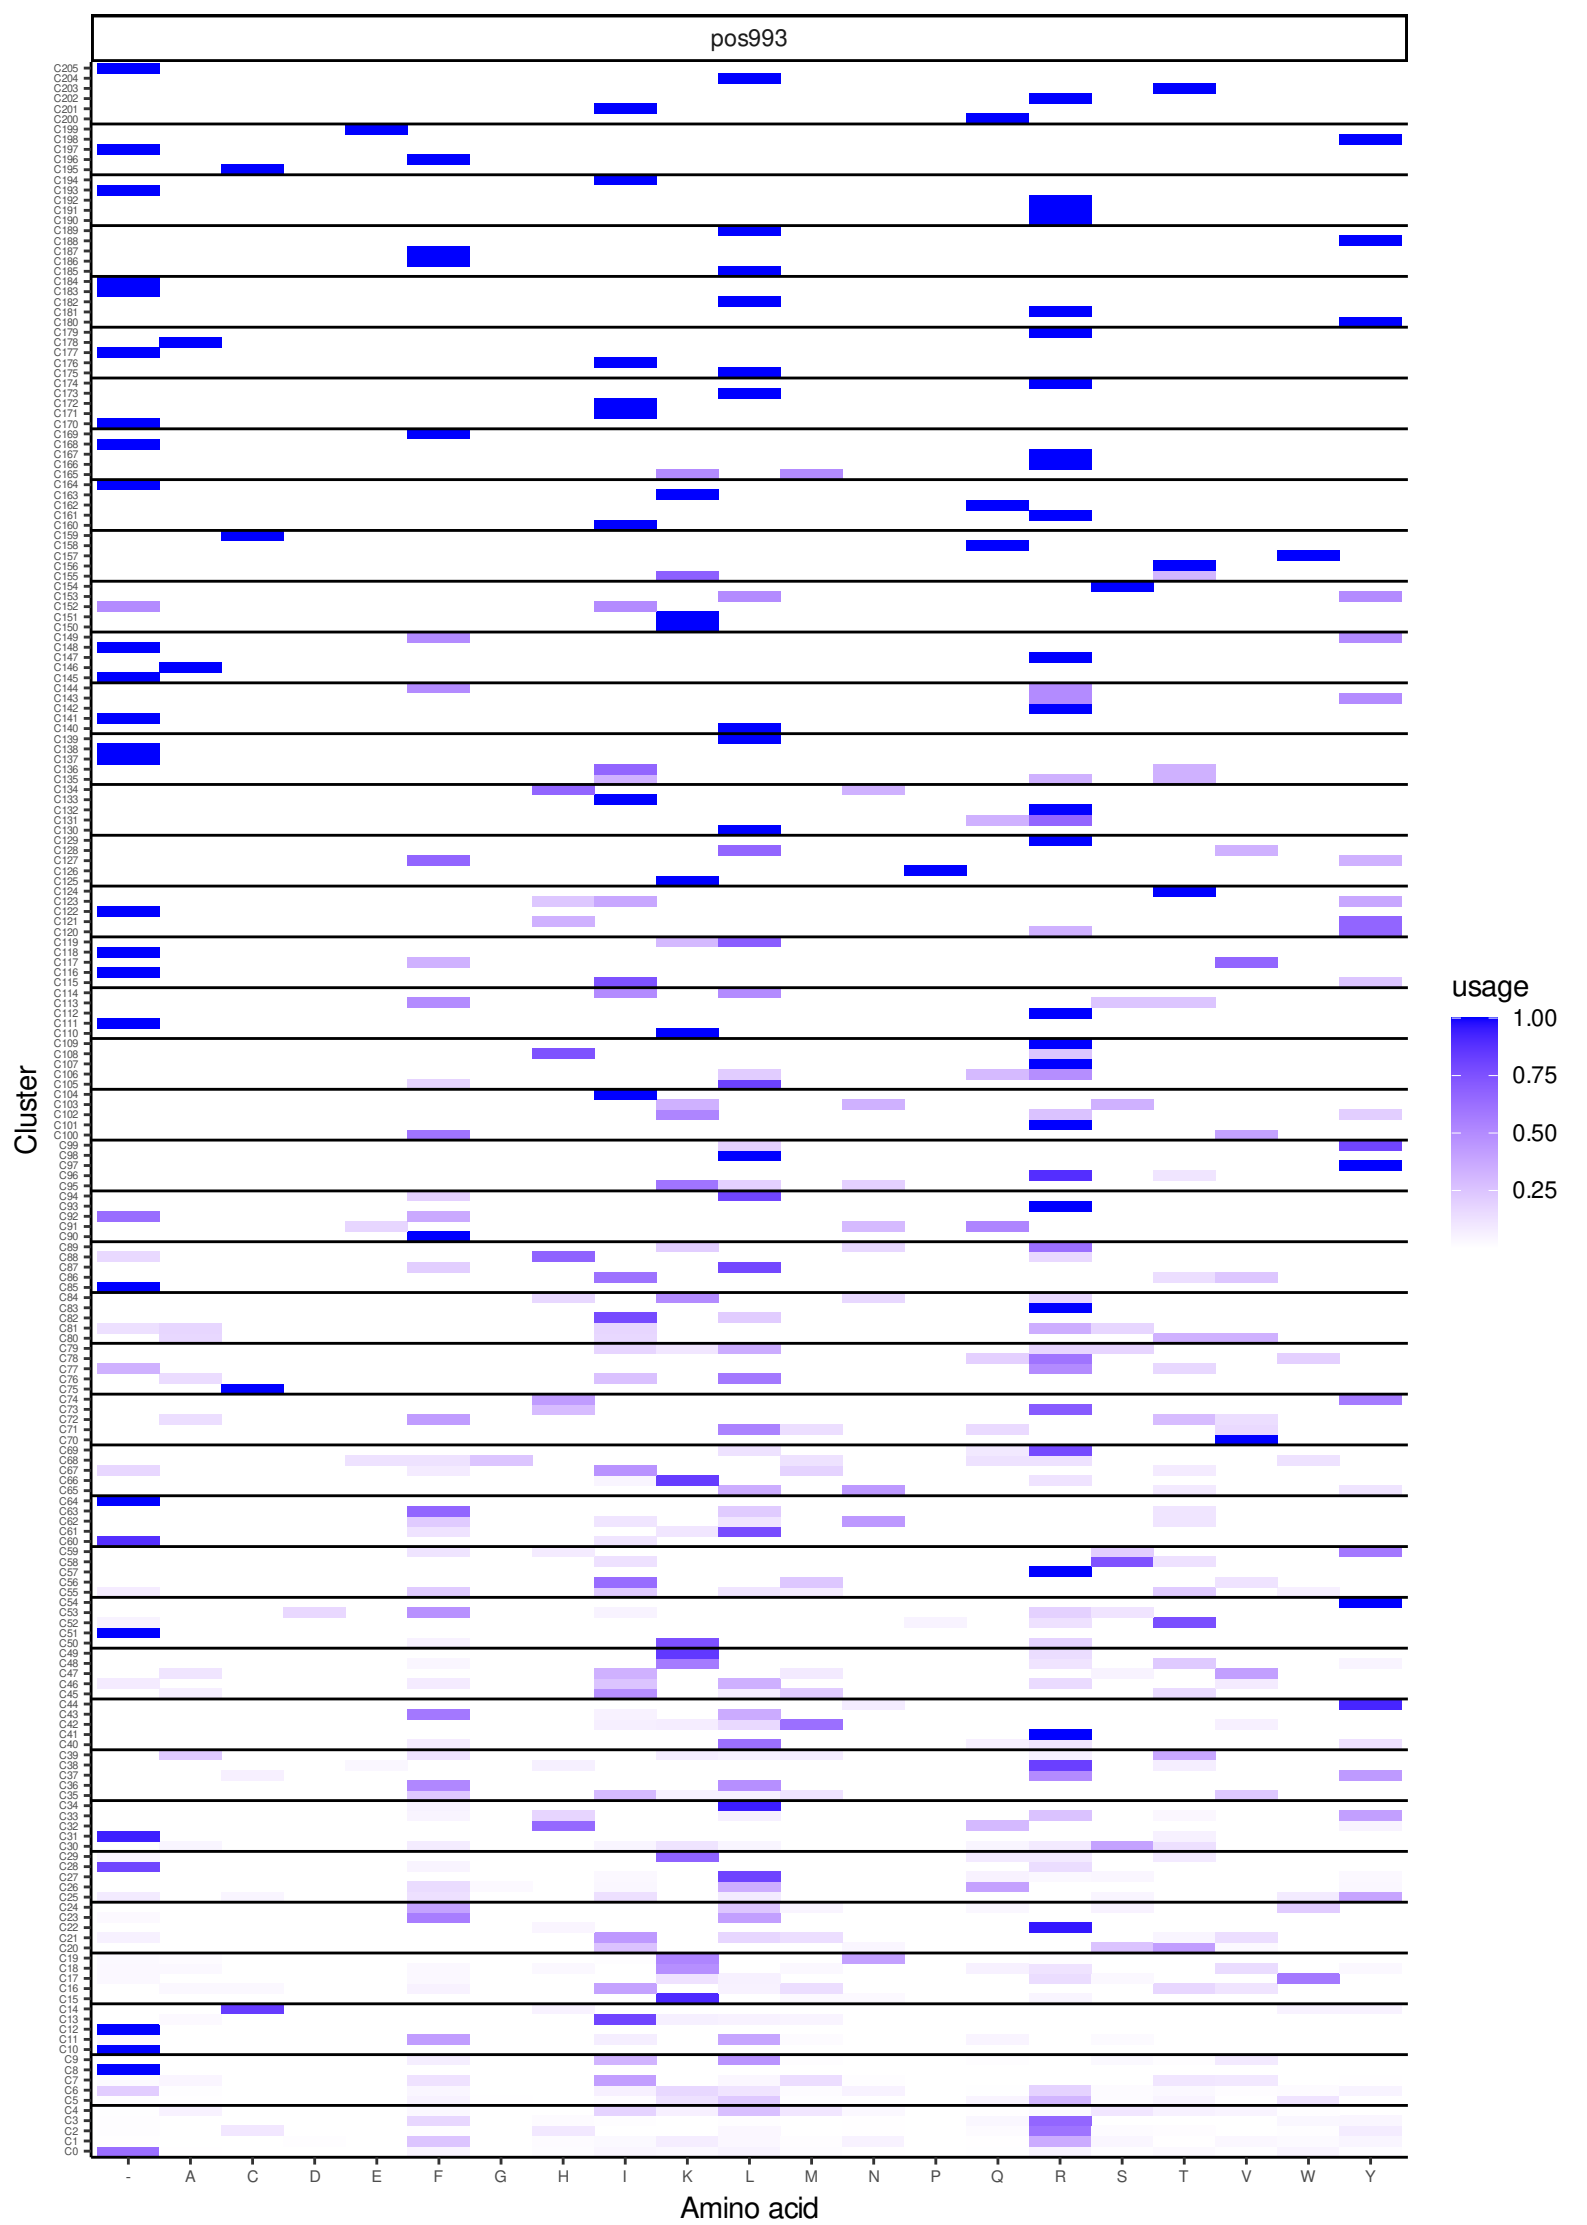

pos1024

Cluster

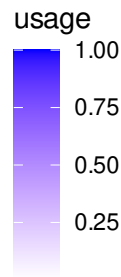

C205  
C204  
C203  
C202  
C201  
C200  
C199  
C198  
C197  
C196  
C195  
C194  
C193  
C192  
C191  
C190  
C189  
C188  
C187  
C186  
C185  
C184  
C183  
C182  
C181  
C180  
C179  
C178  
C177  
C176  
C175  
C174  
C173  
C172  
C171  
C170  
C169  
C168  
C167  
C166  
C165  
C164  
C163  
C162  
C161  
C160  
C159  
C158  
C157  
C156  
C155  
C154  
C153  
C152  
C151  
C150  
C149  
C148  
C147  
C146  
C145  
C144  
C143  
C142  
C141  
C140  
C139  
C138  
C137  
C136  
C135  
C134  
C133  
C132  
C131  
C130  
C129  
C128  
C127  
C126  
C125  
C124  
C123  
C122  
C121  
C120  
C119  
C118  
C117  
C116  
C115  
C114  
C113  
C112  
C111  
C110  
C109  
C108  
C107  
C106  
C105  
C104  
C103  
C102  
C101  
C100  
C99  
C98  
C97  
C96  
C95  
C94  
C93  
C92  
C91  
C90  
C89  
C88  
C87  
C86  
C85  
C84  
C83  
C82  
C81  
C80  
C79  
C78  
C77  
C76  
C75  
C74  
C73  
C72  
C71  
C70  
C69  
C68  
C67  
C66  
C65  
C64  
C63  
C62  
C61  
C60  
C59  
C58  
C57  
C56  
C55  
C54  
C53  
C52  
C51  
C50  
C49  
C48  
C47  
C46  
C45  
C44  
C43  
C42  
C41  
C40  
C39  
C38  
C37  
C36  
C35  
C34  
C33  
C32  
C31  
C30  
C29  
C28  
C27  
C26  
C25  
C24  
C23  
C22  
C21  
C20  
C19  
C18  
C17  
C16  
C15  
C14  
C13  
C12  
C11  
C10  
C9  
C8  
C7  
C6  
C5  
C4  
C3  
C2  
C1  
C0

Amino acid

- A C F G H I K L M N R S T V W Y

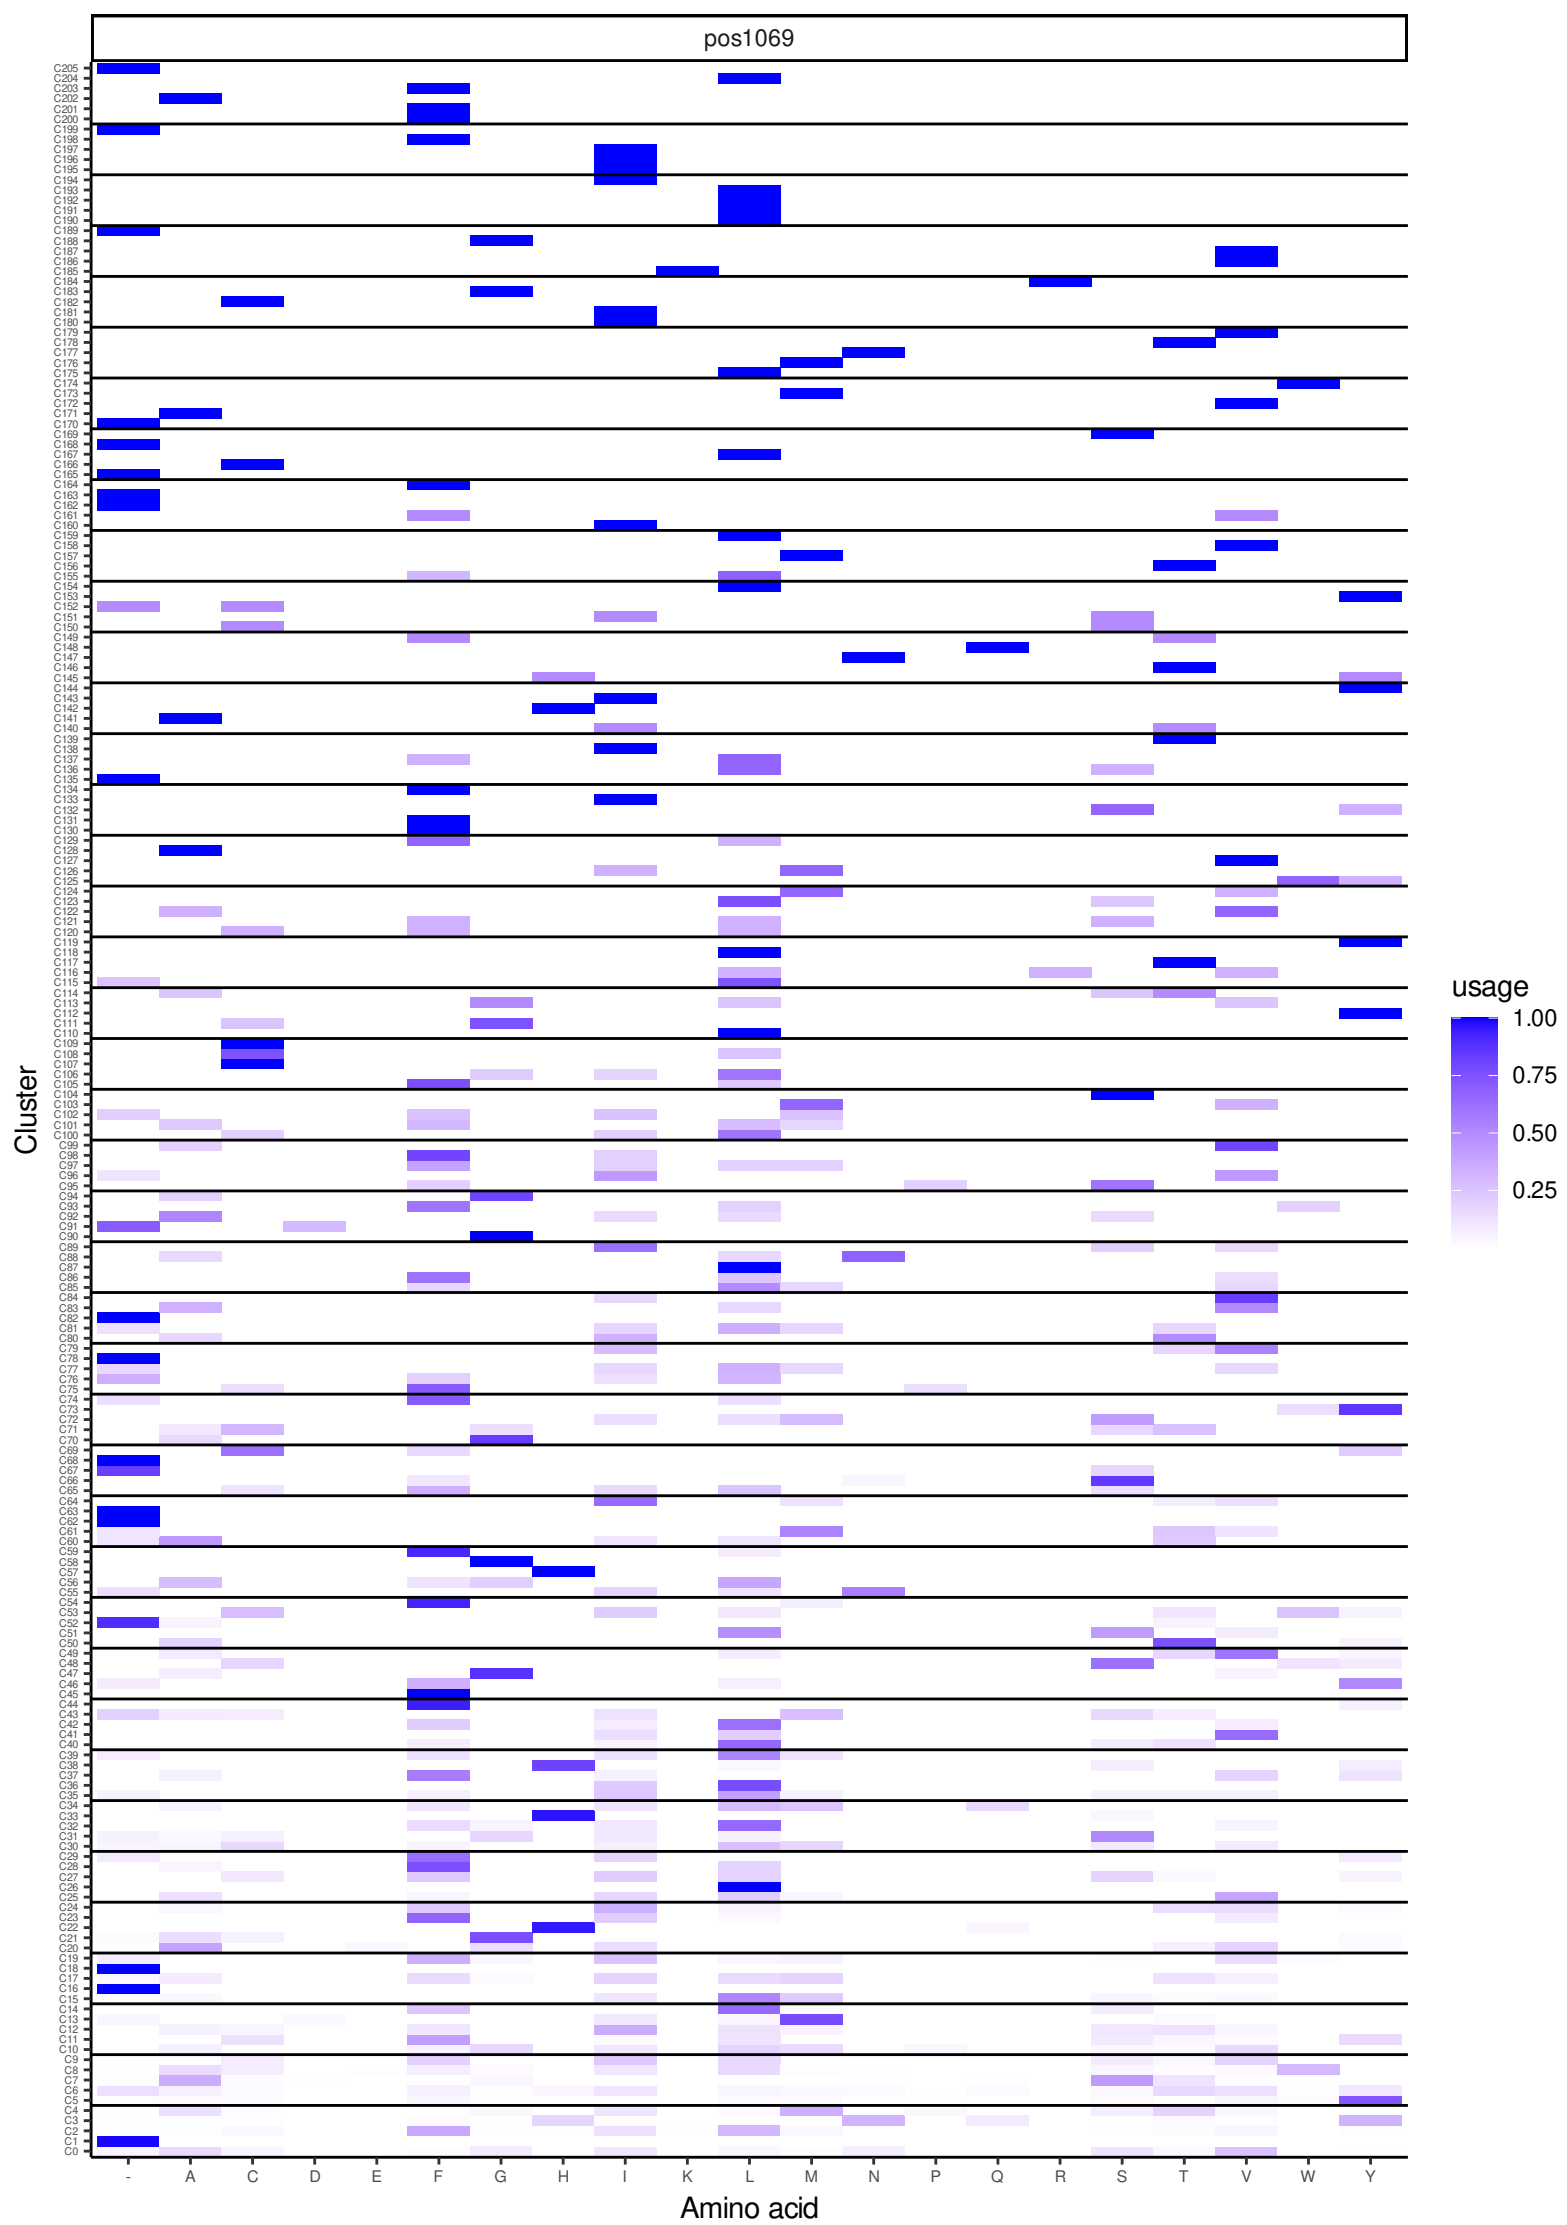

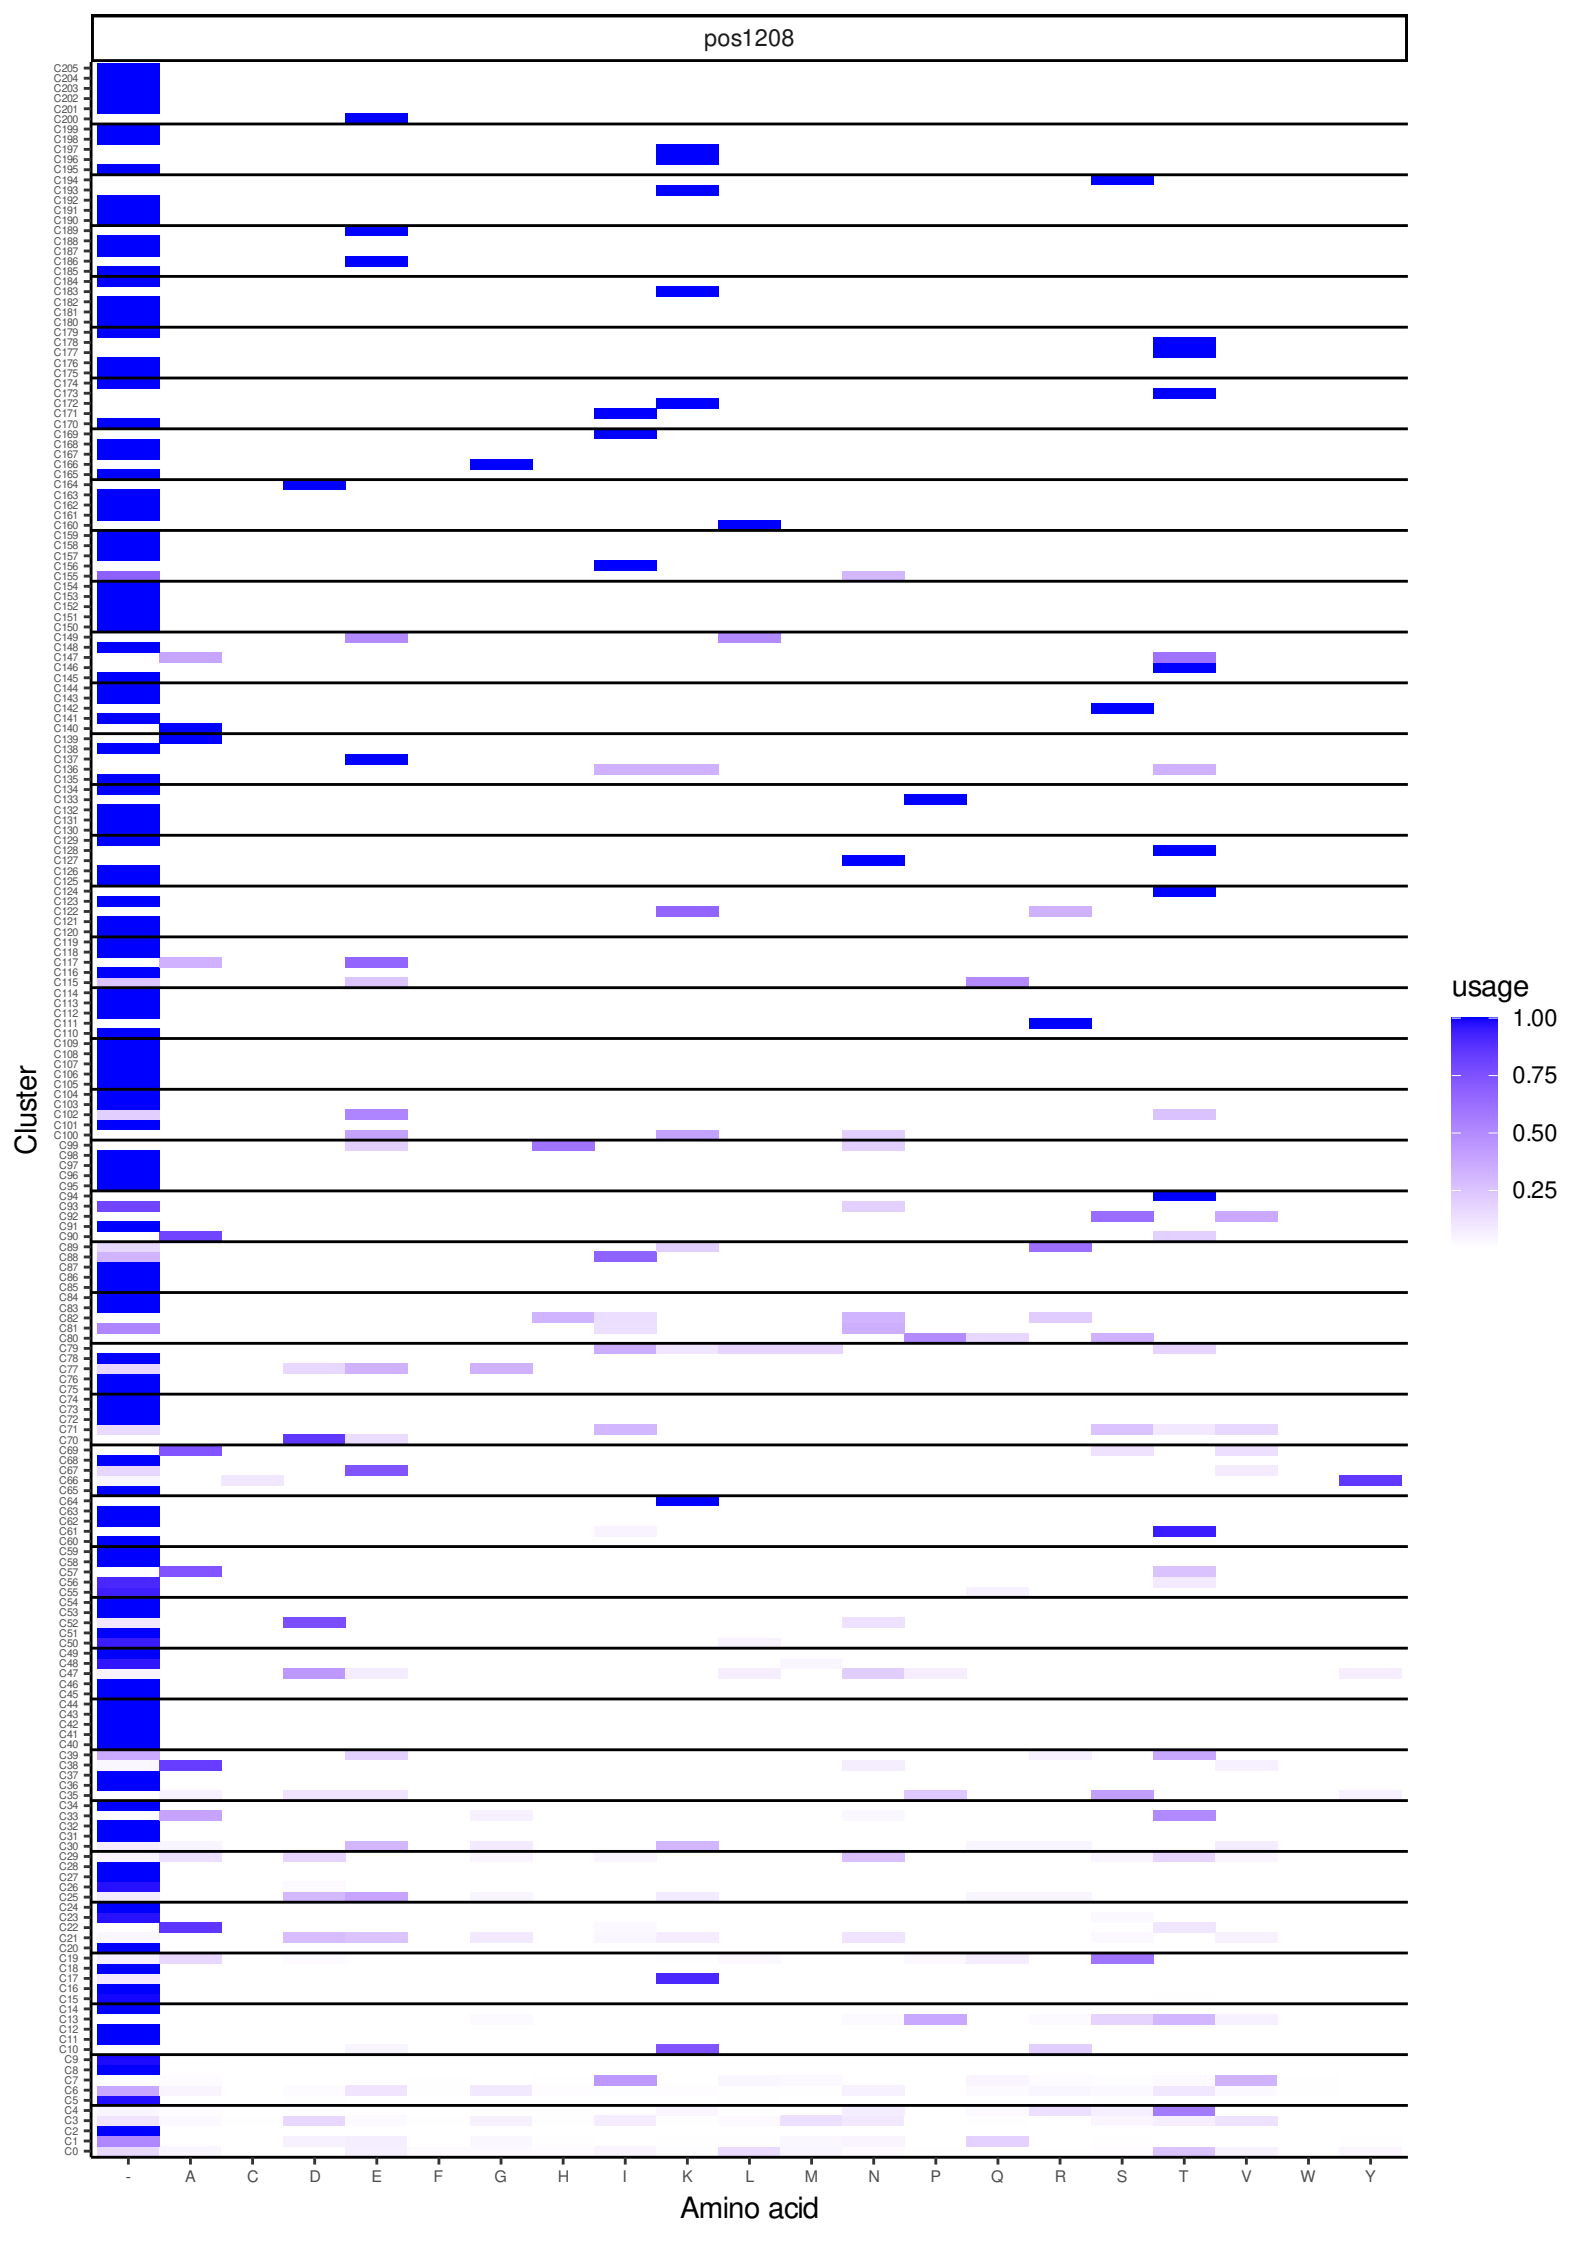

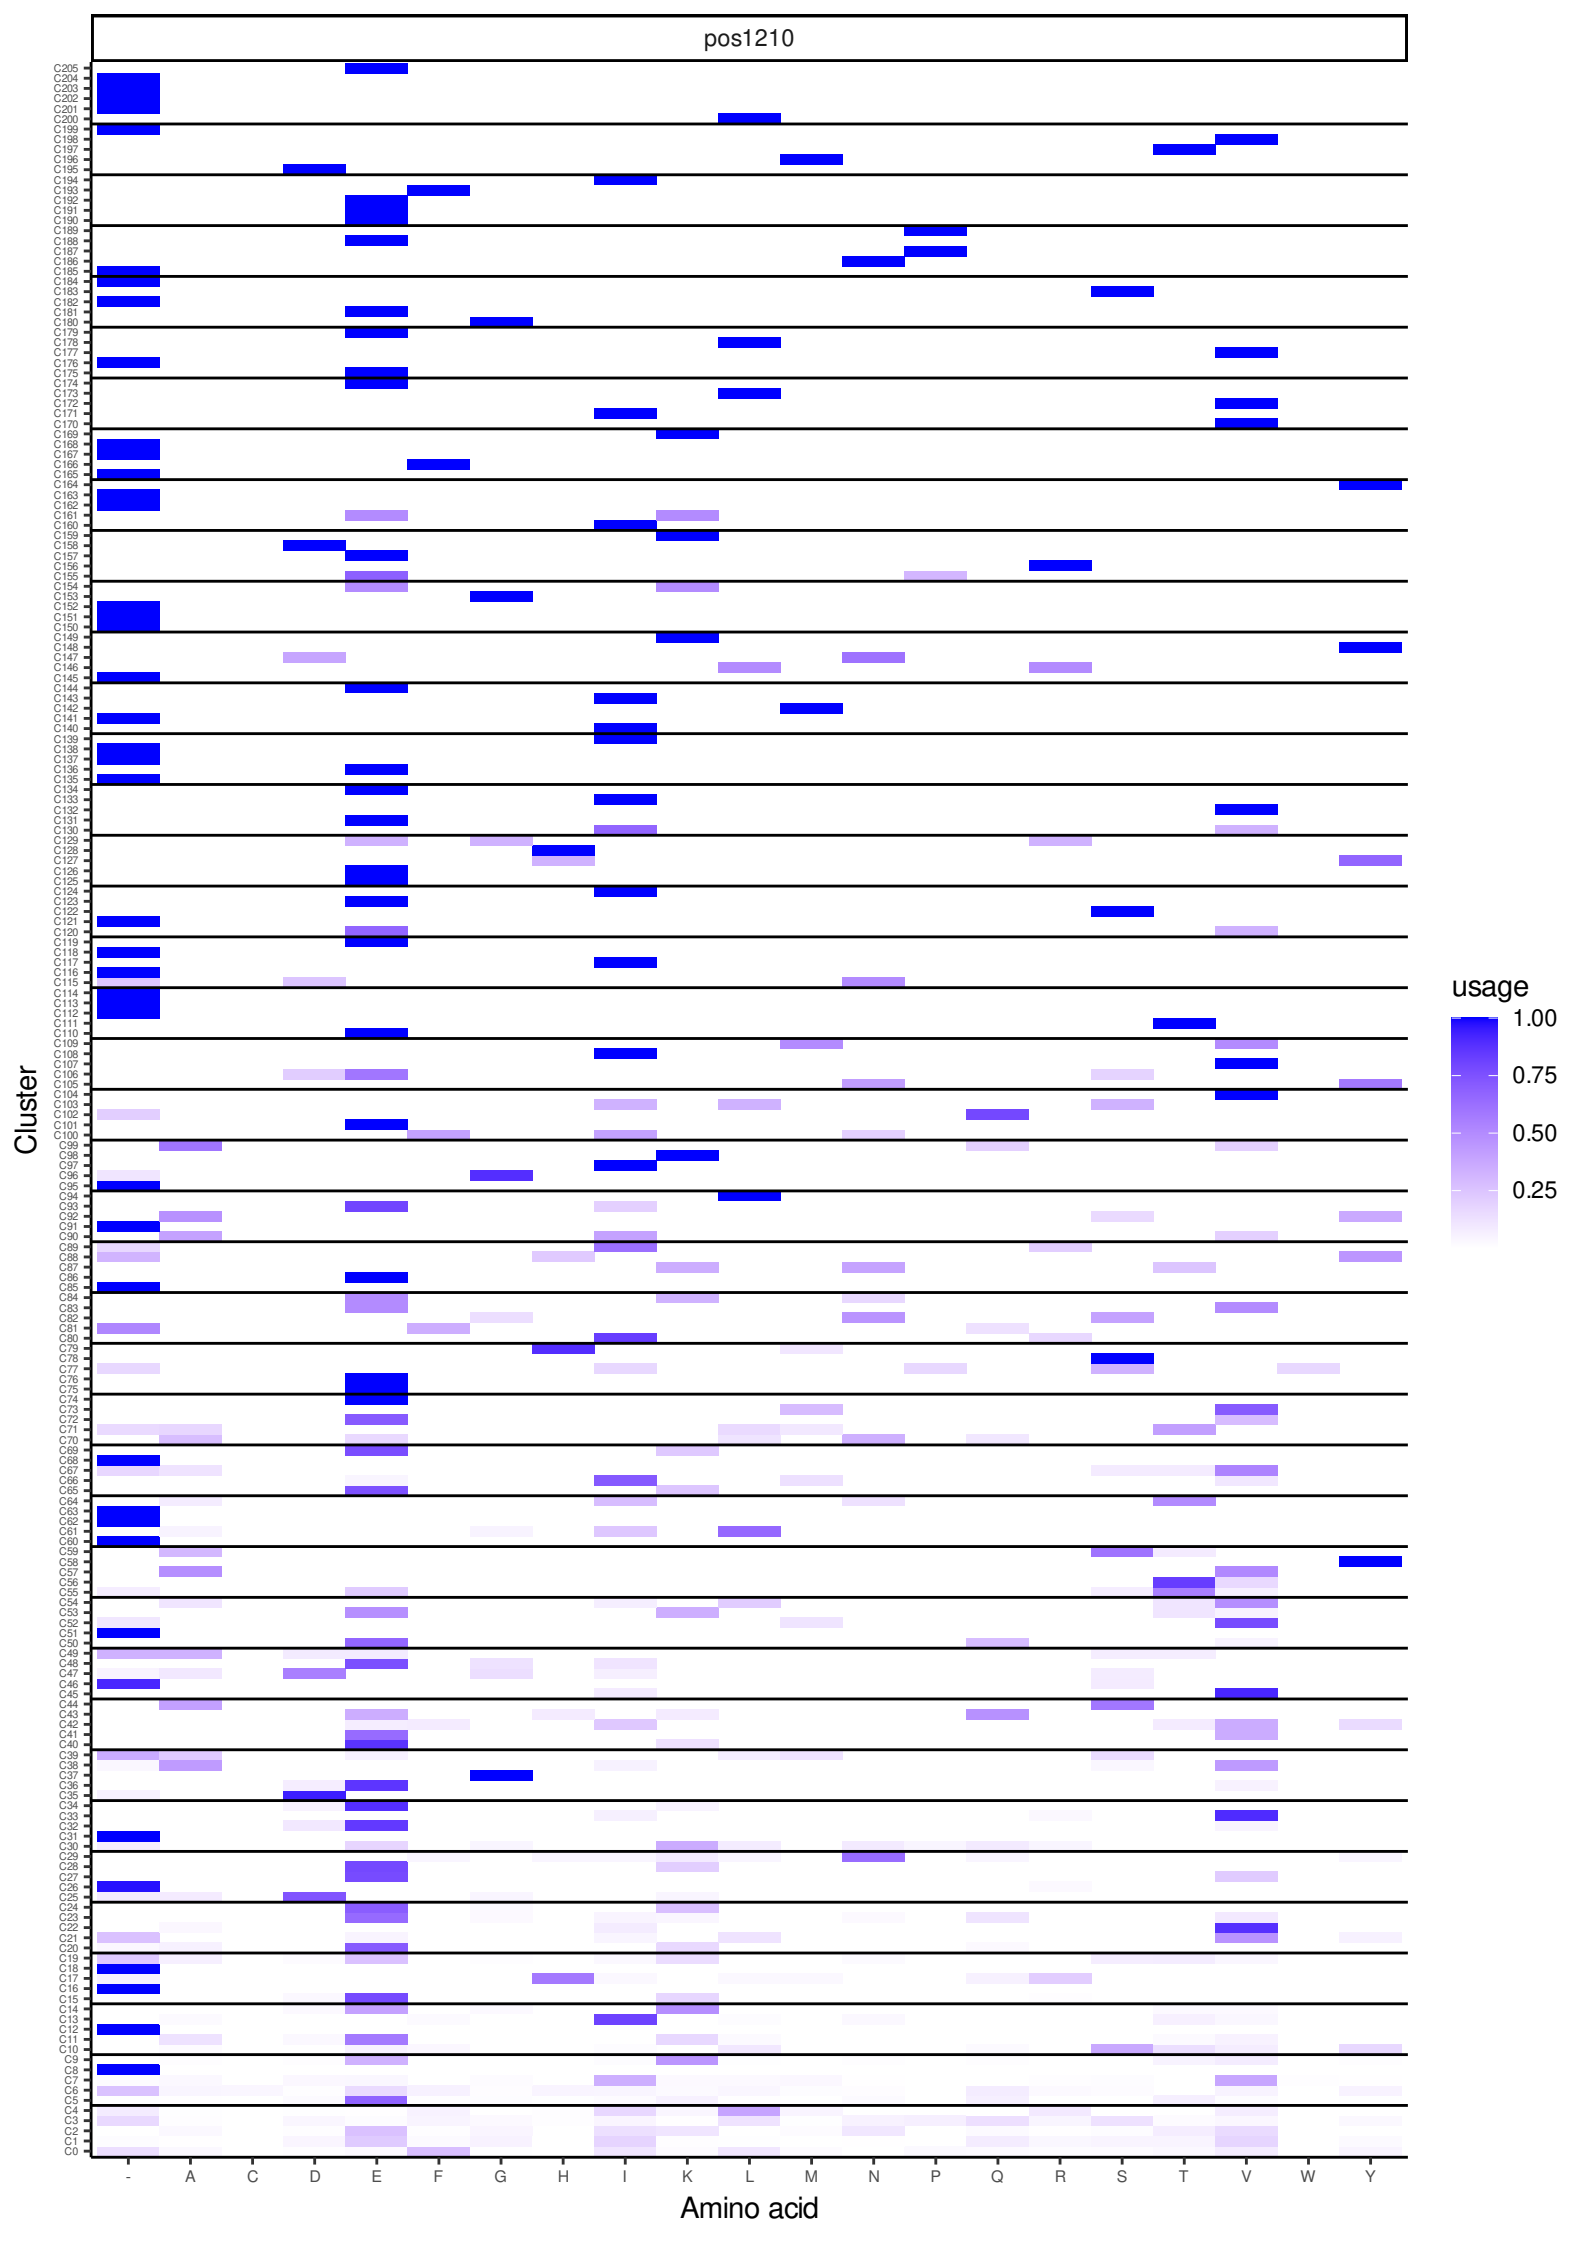

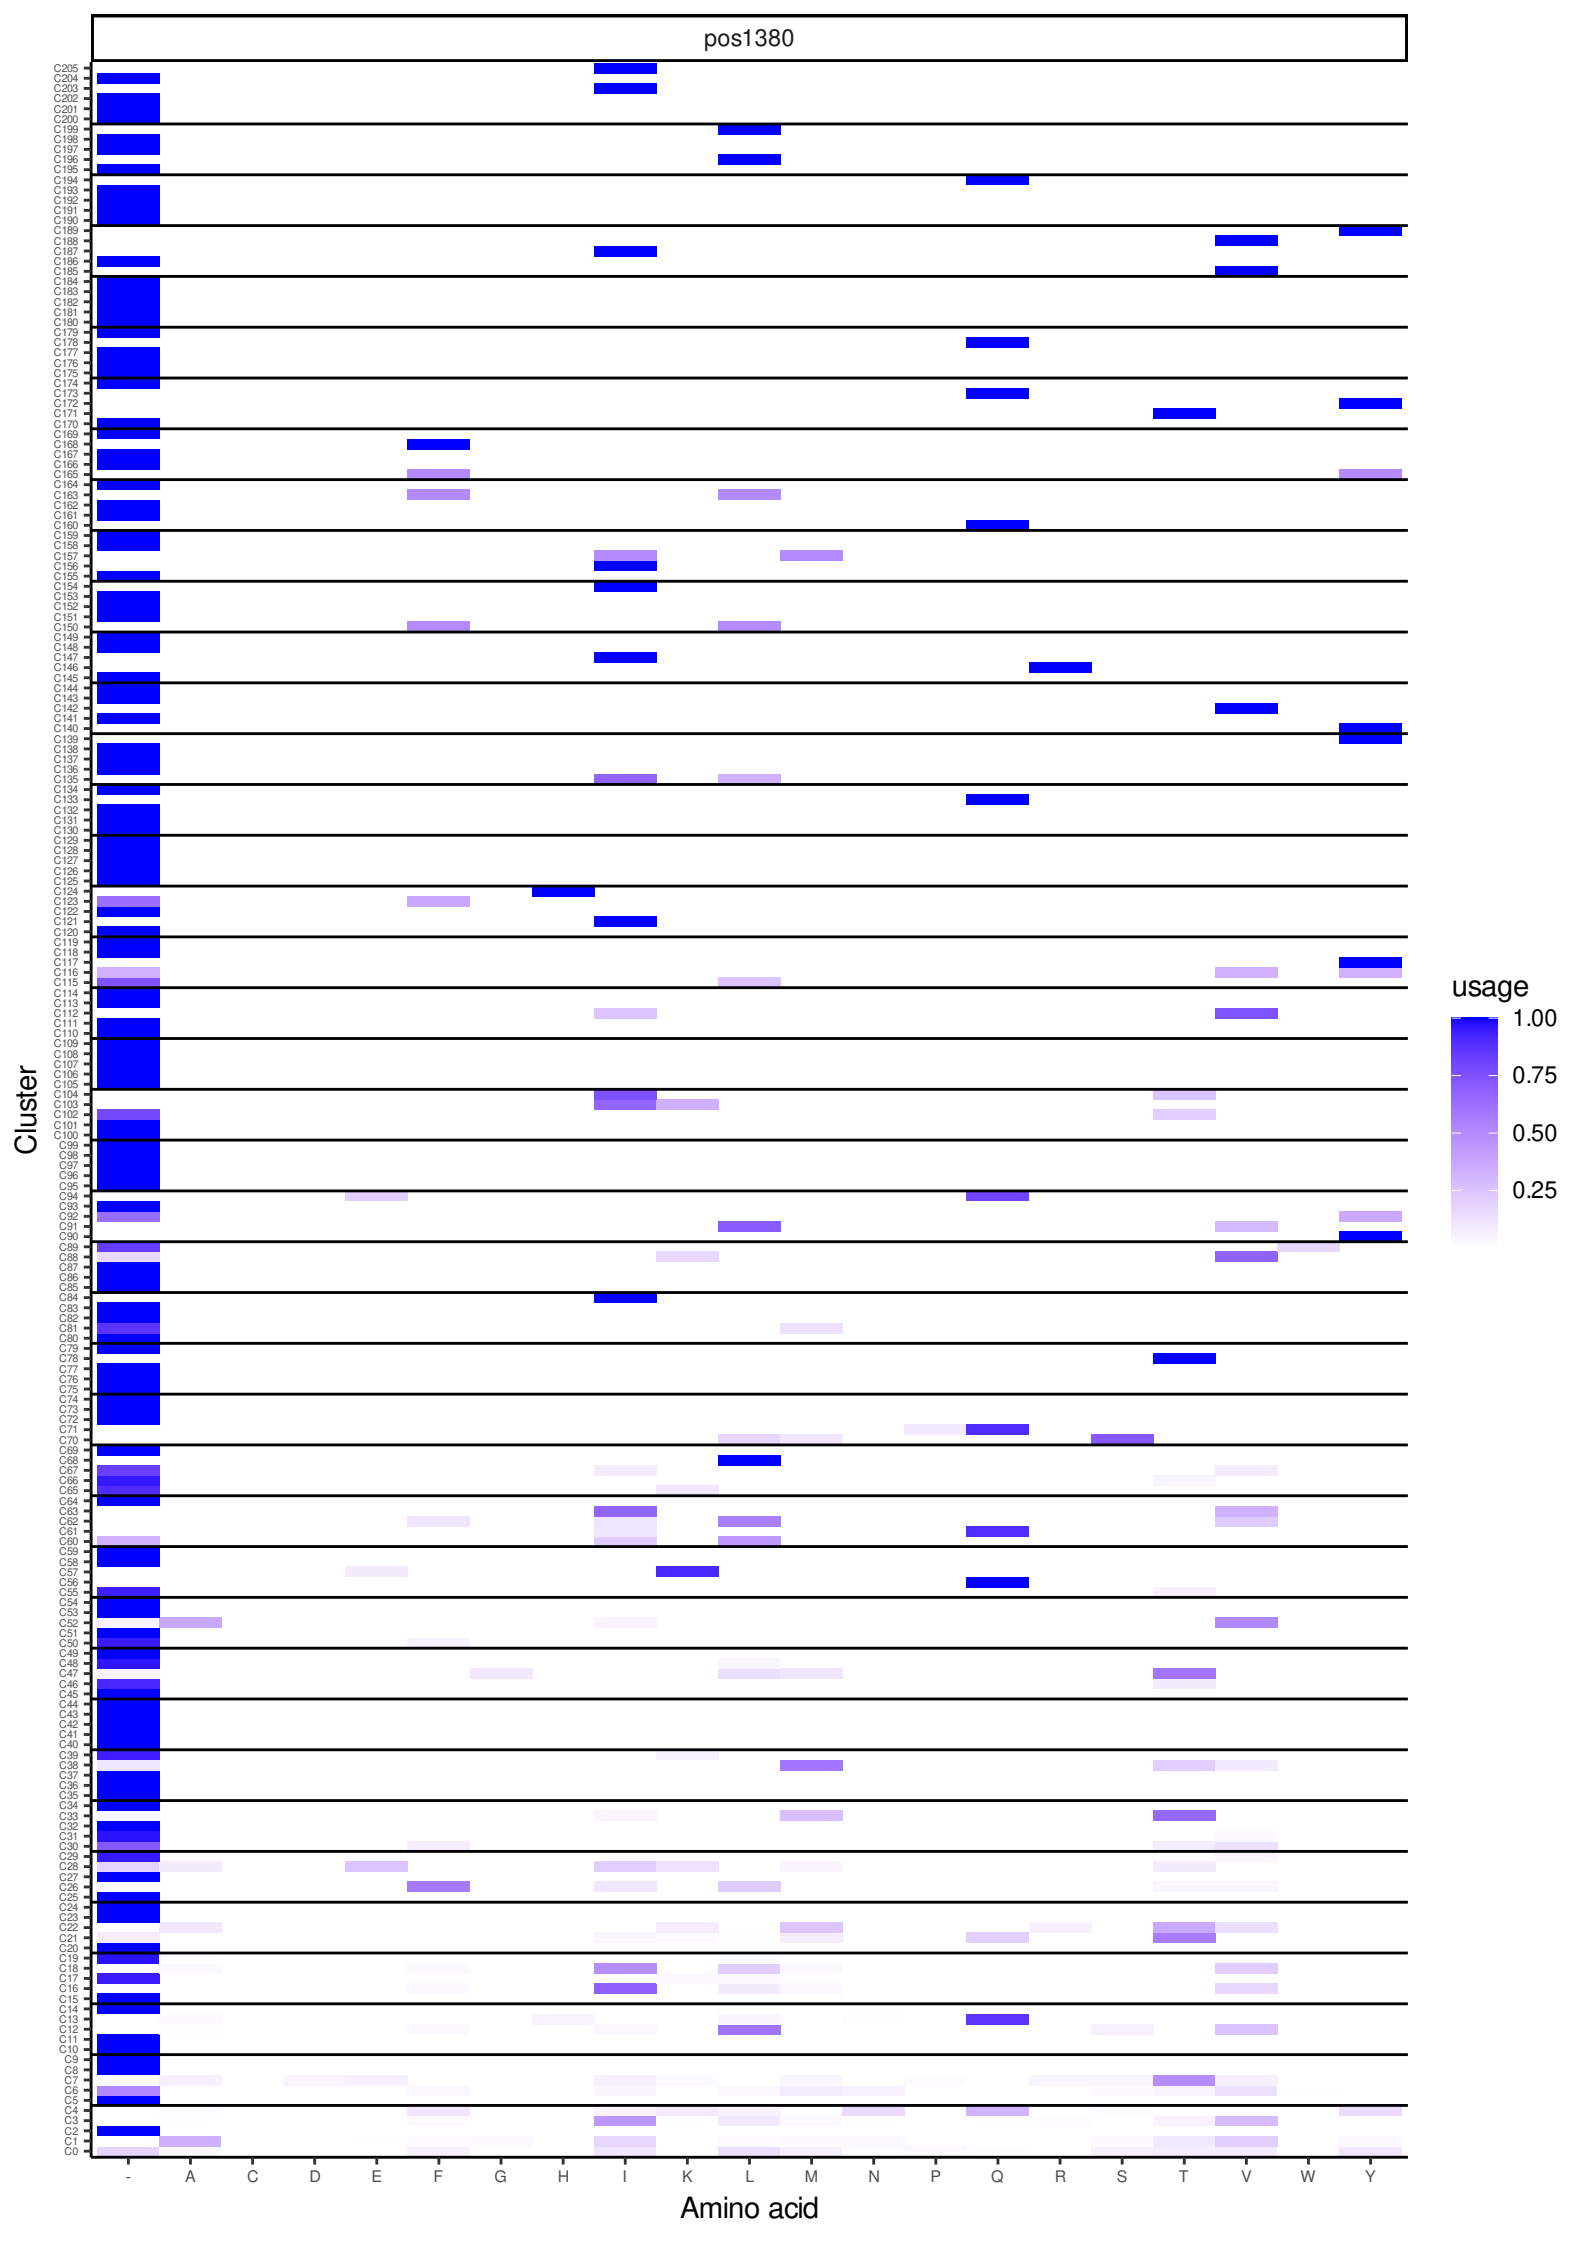

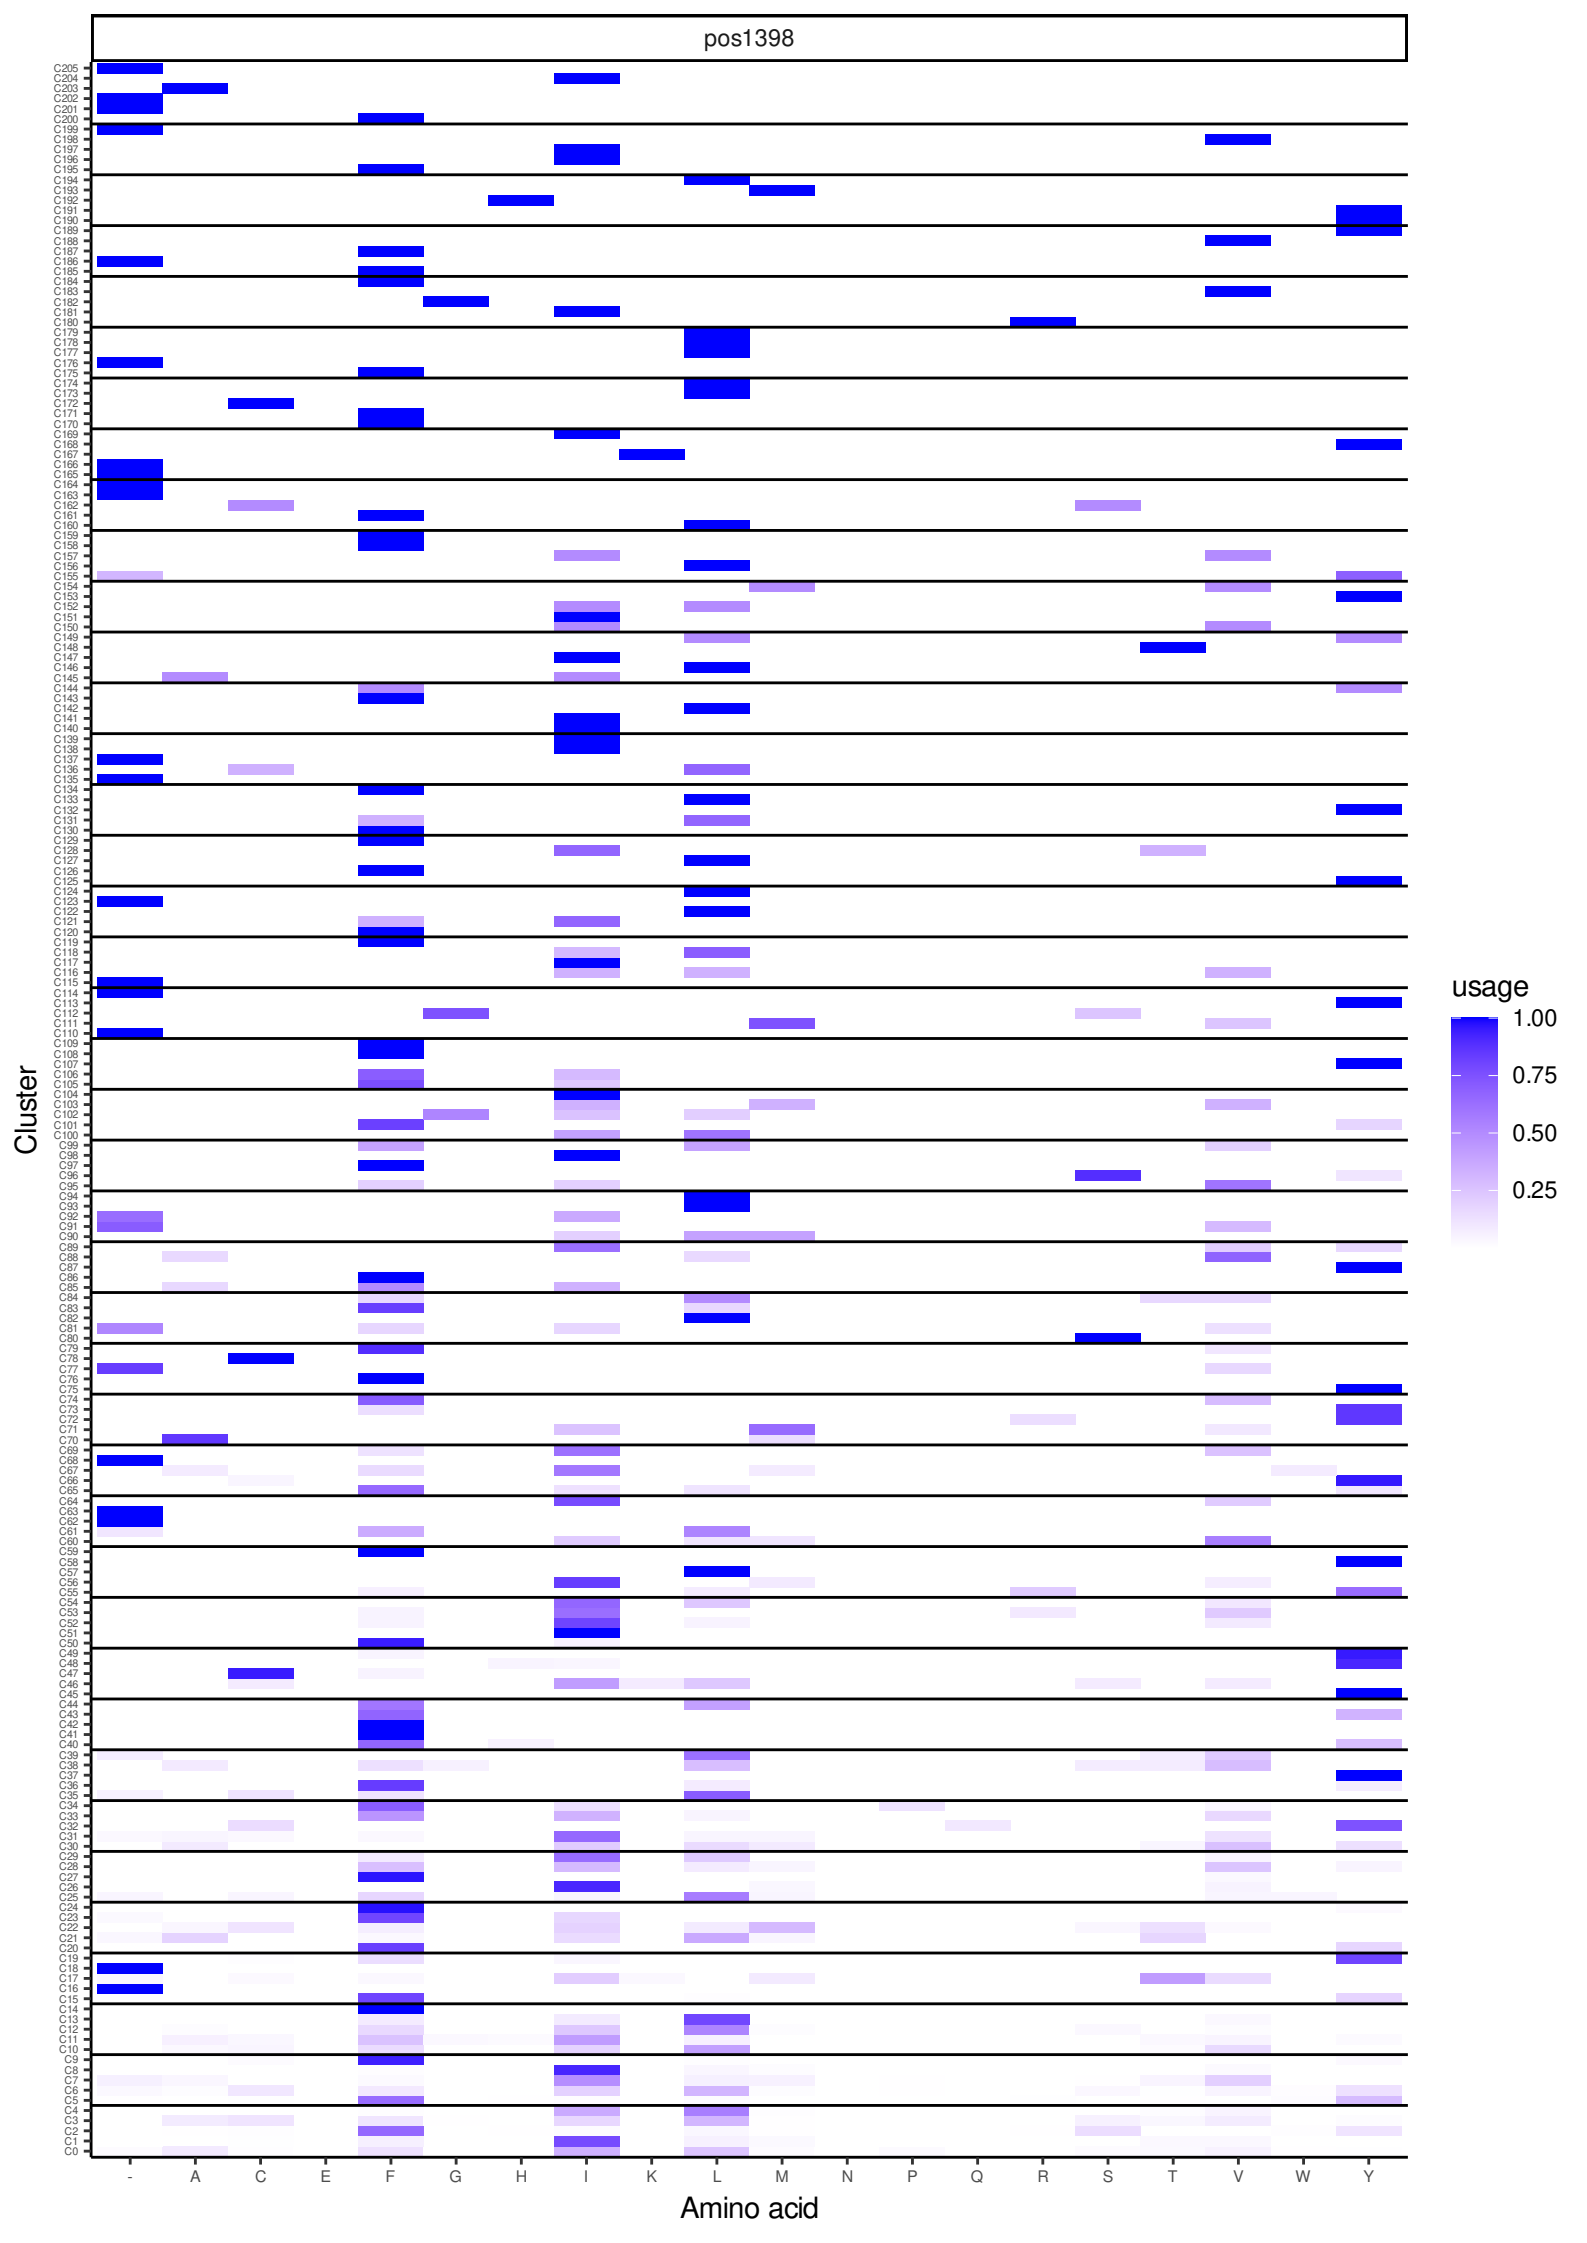

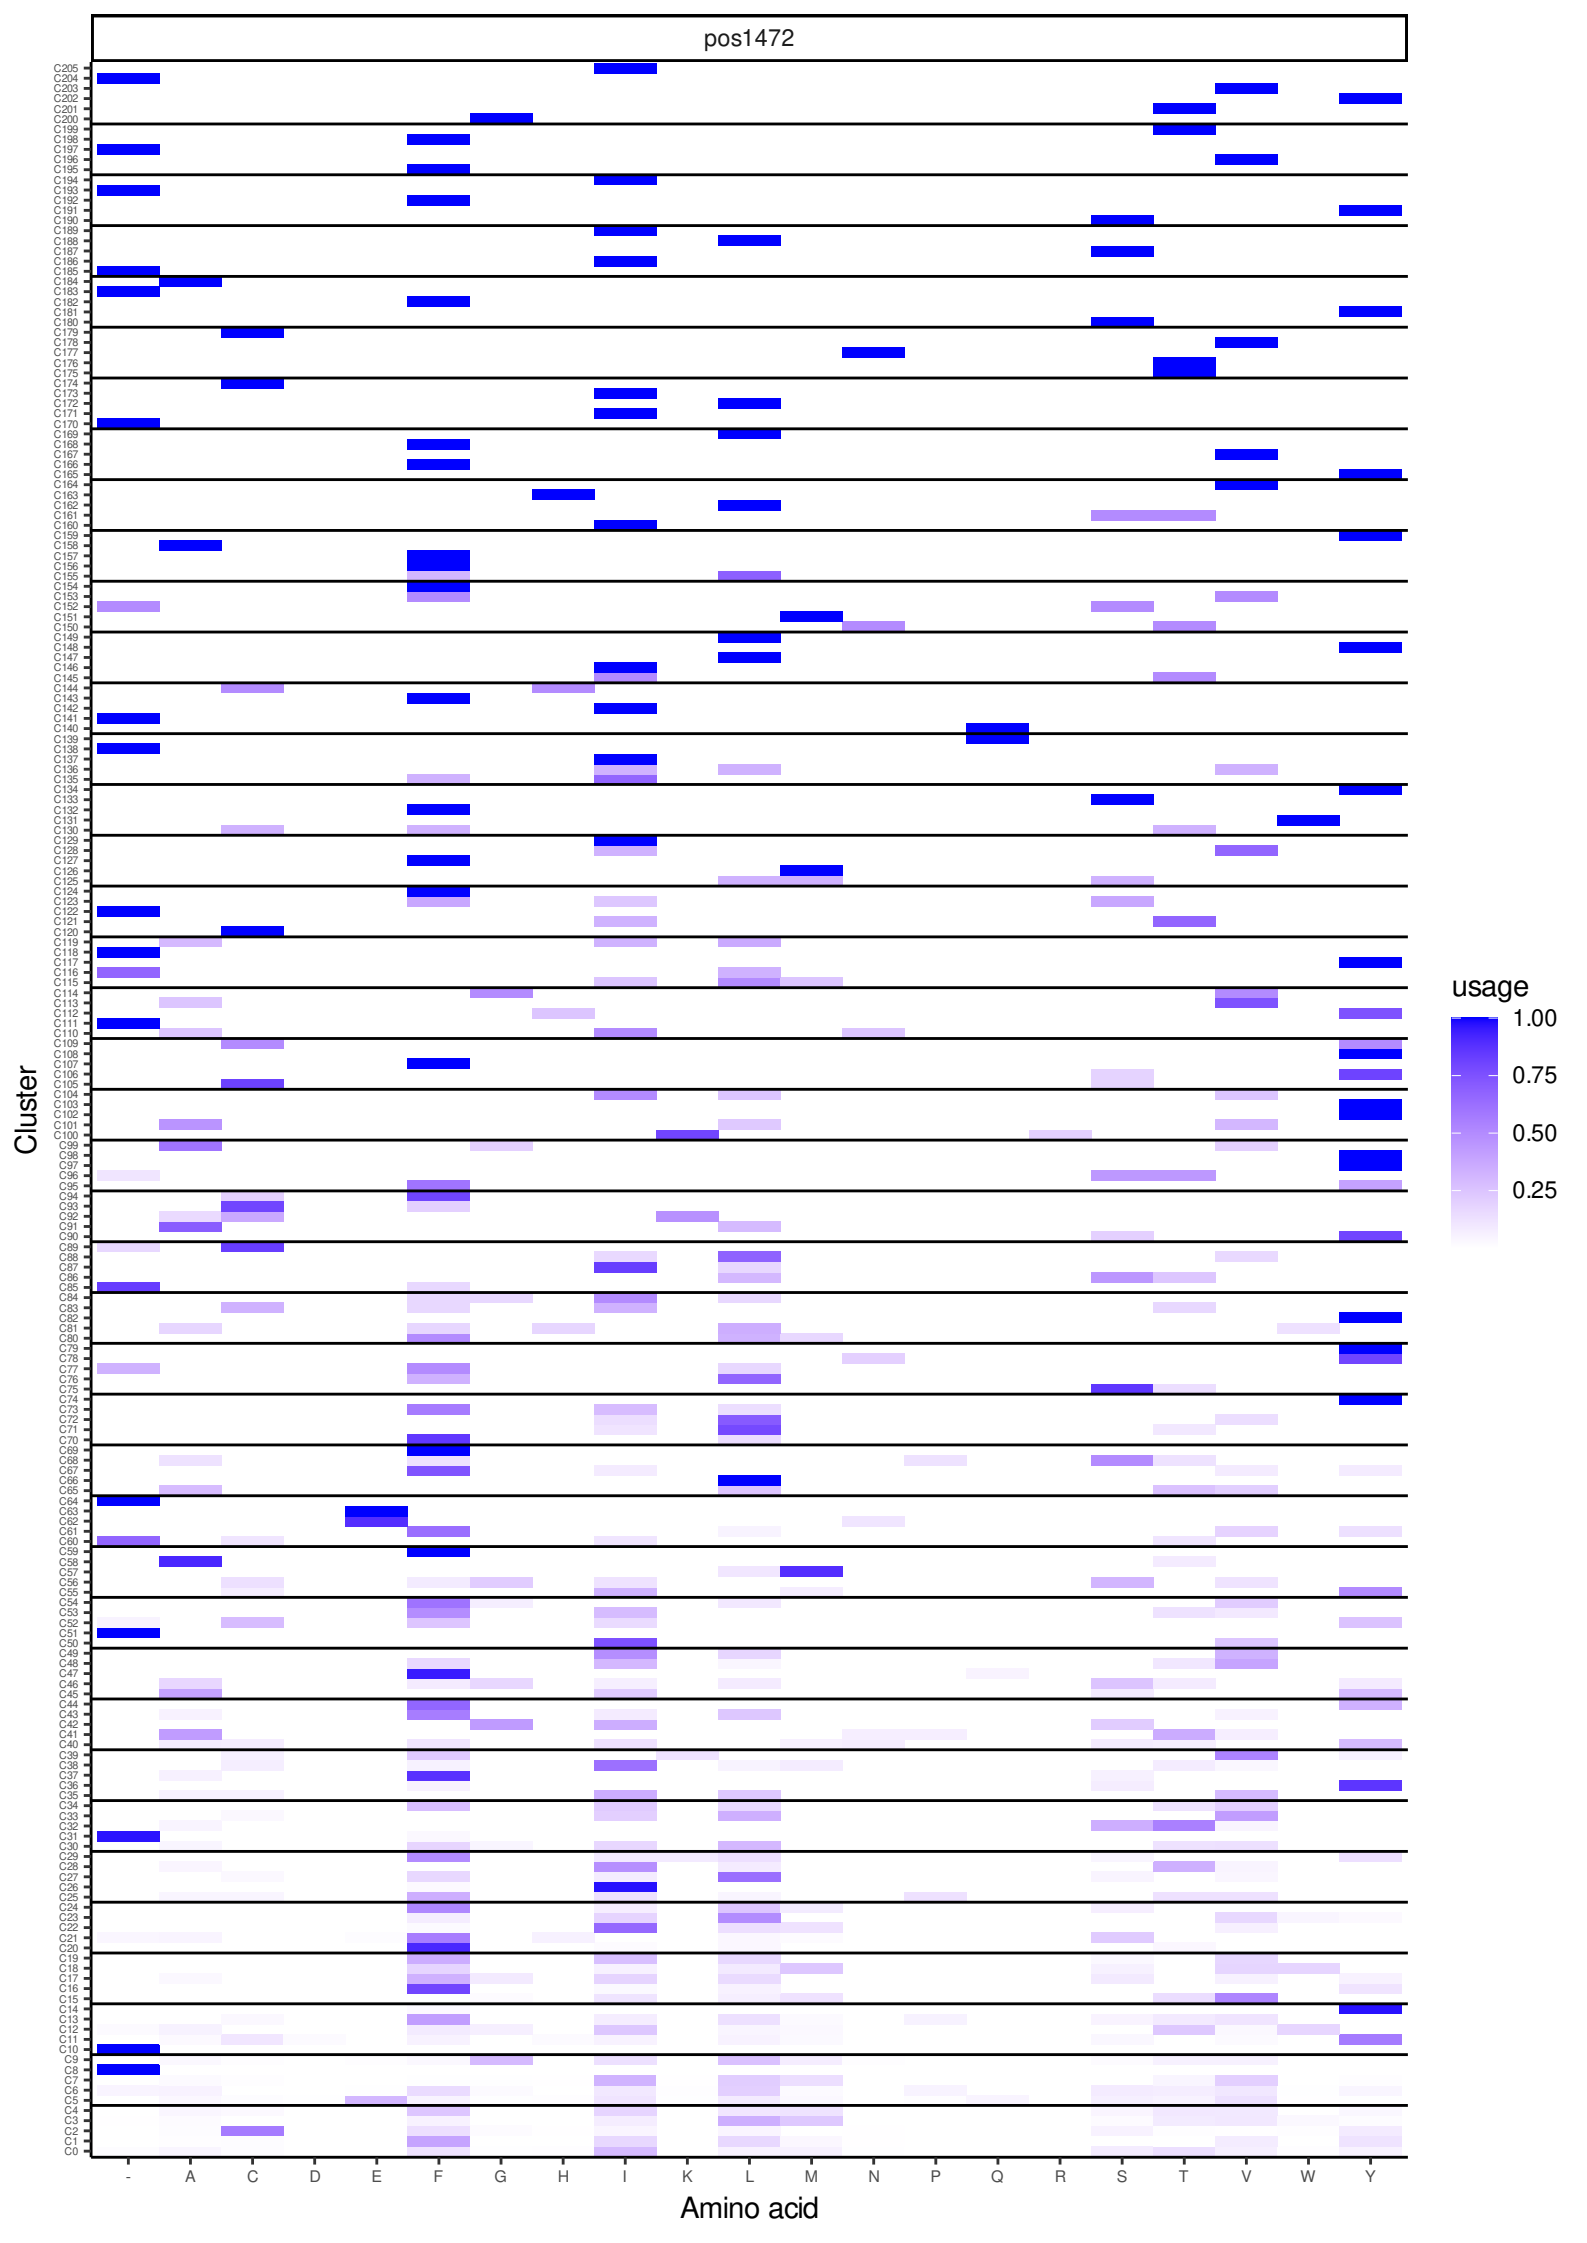



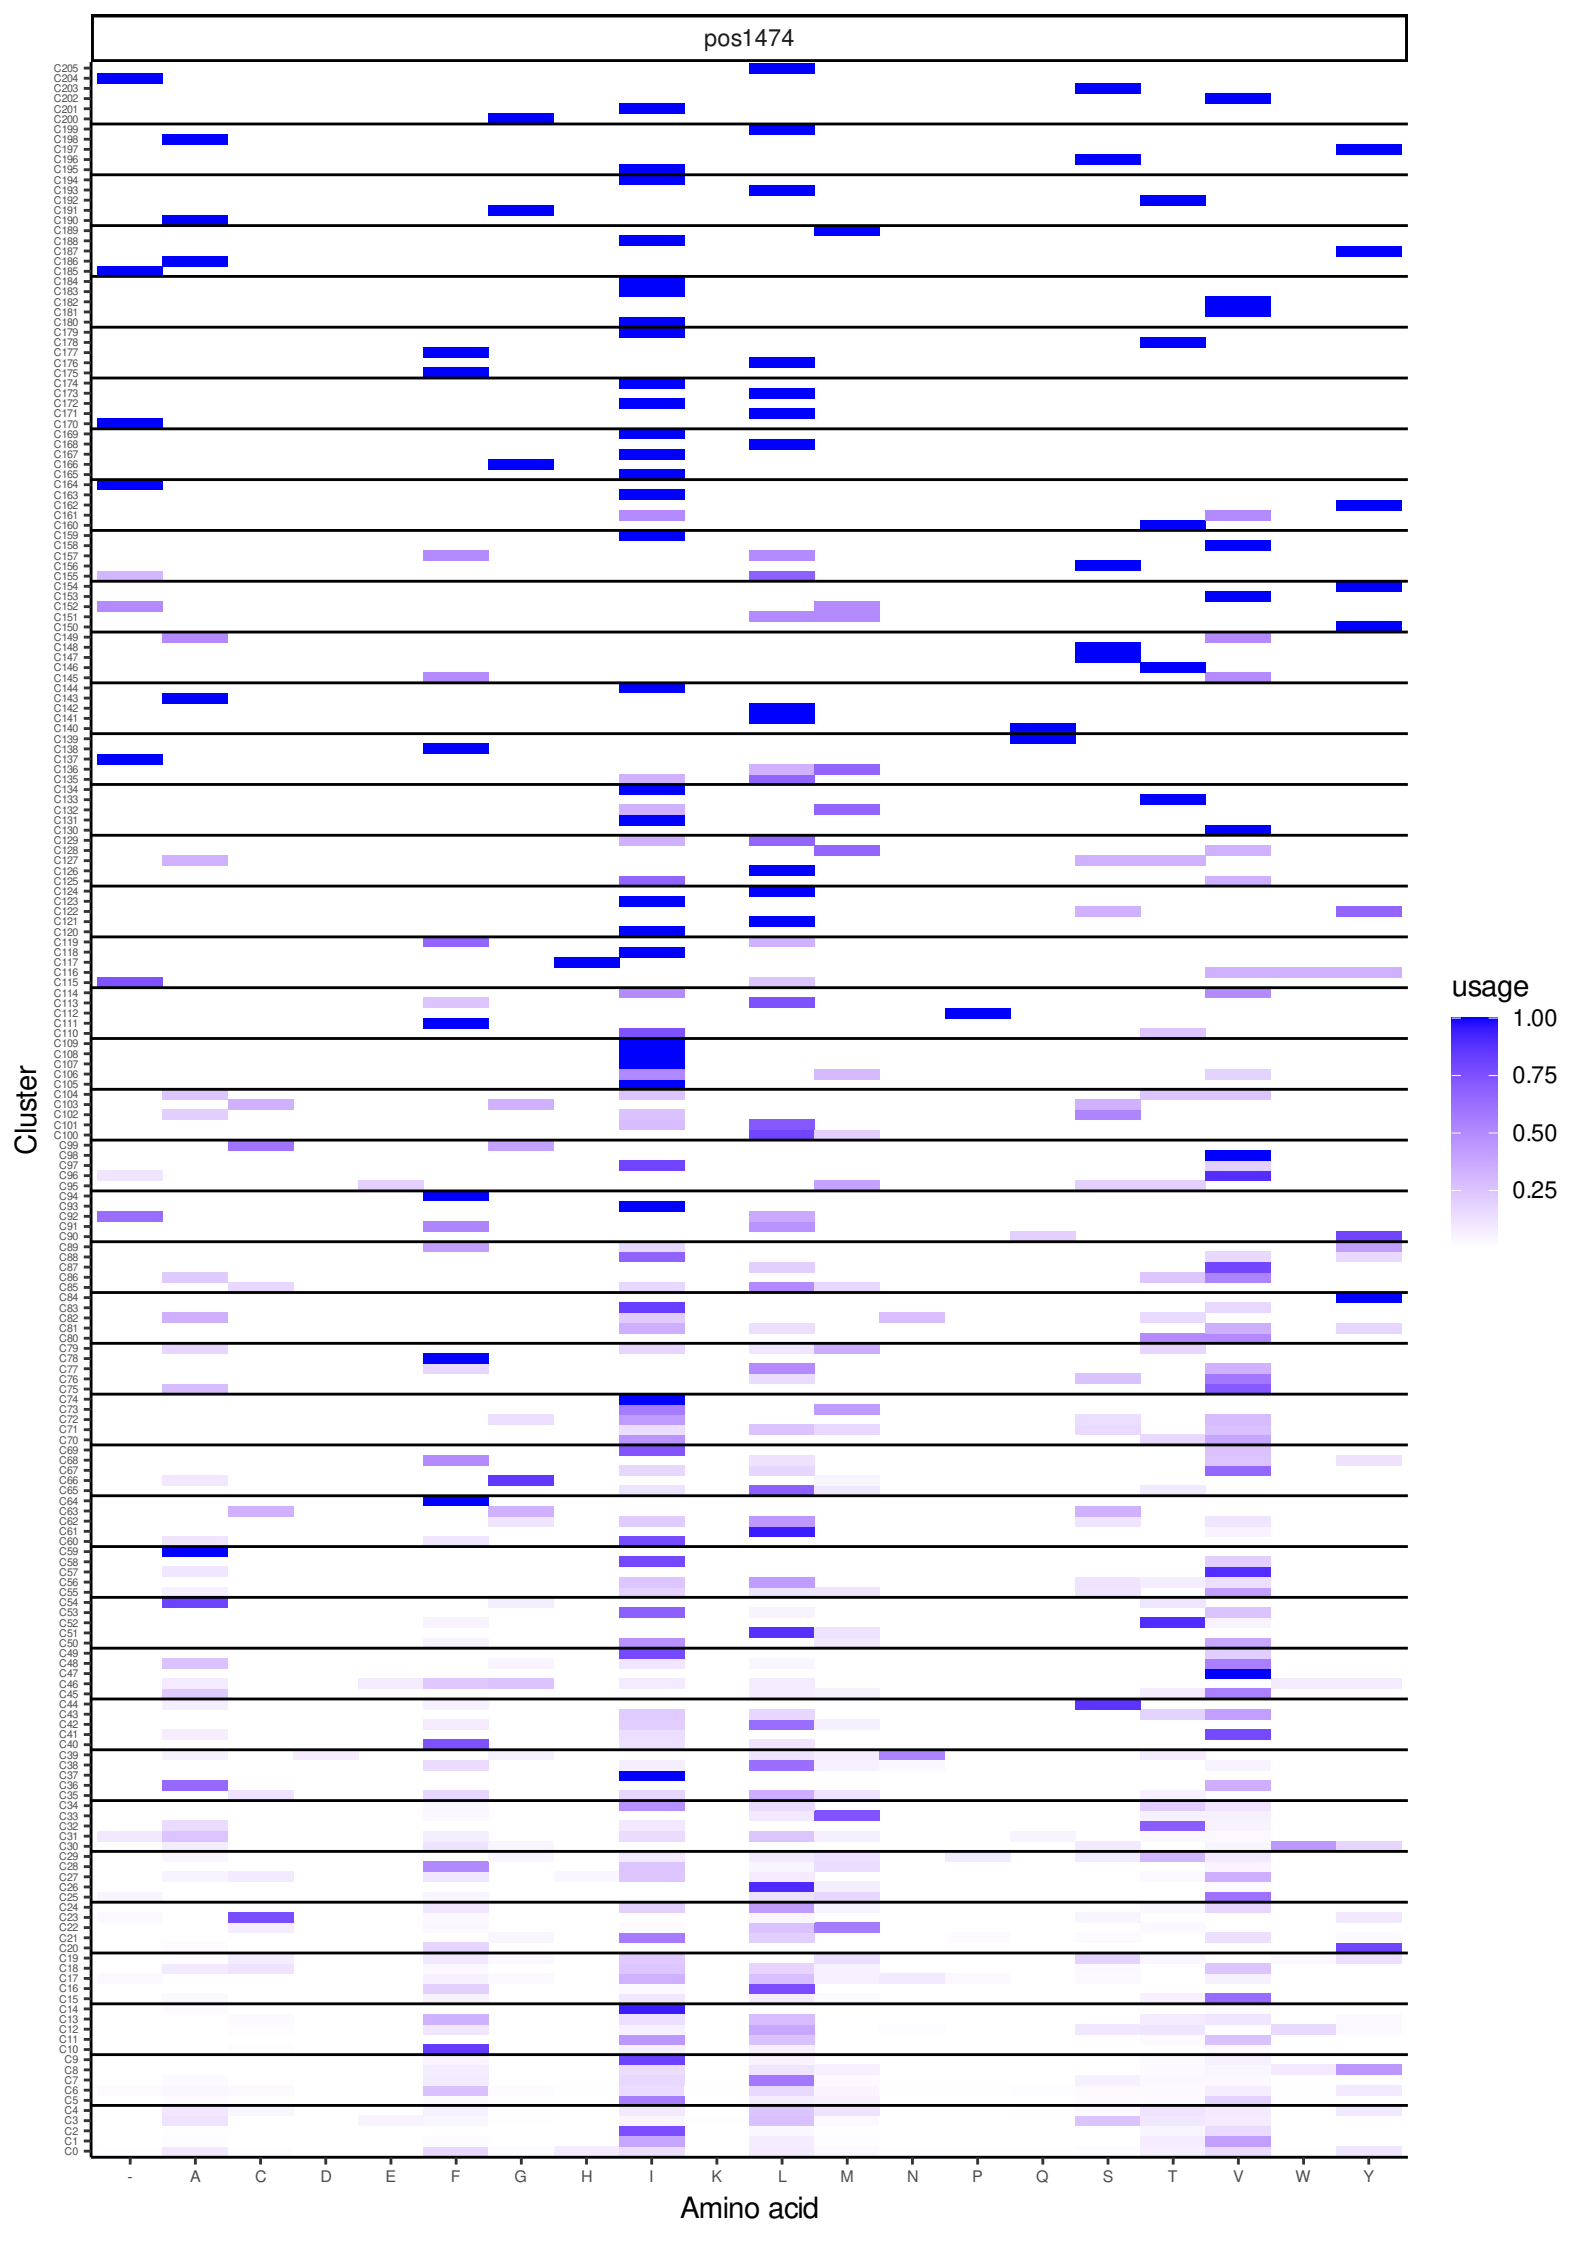

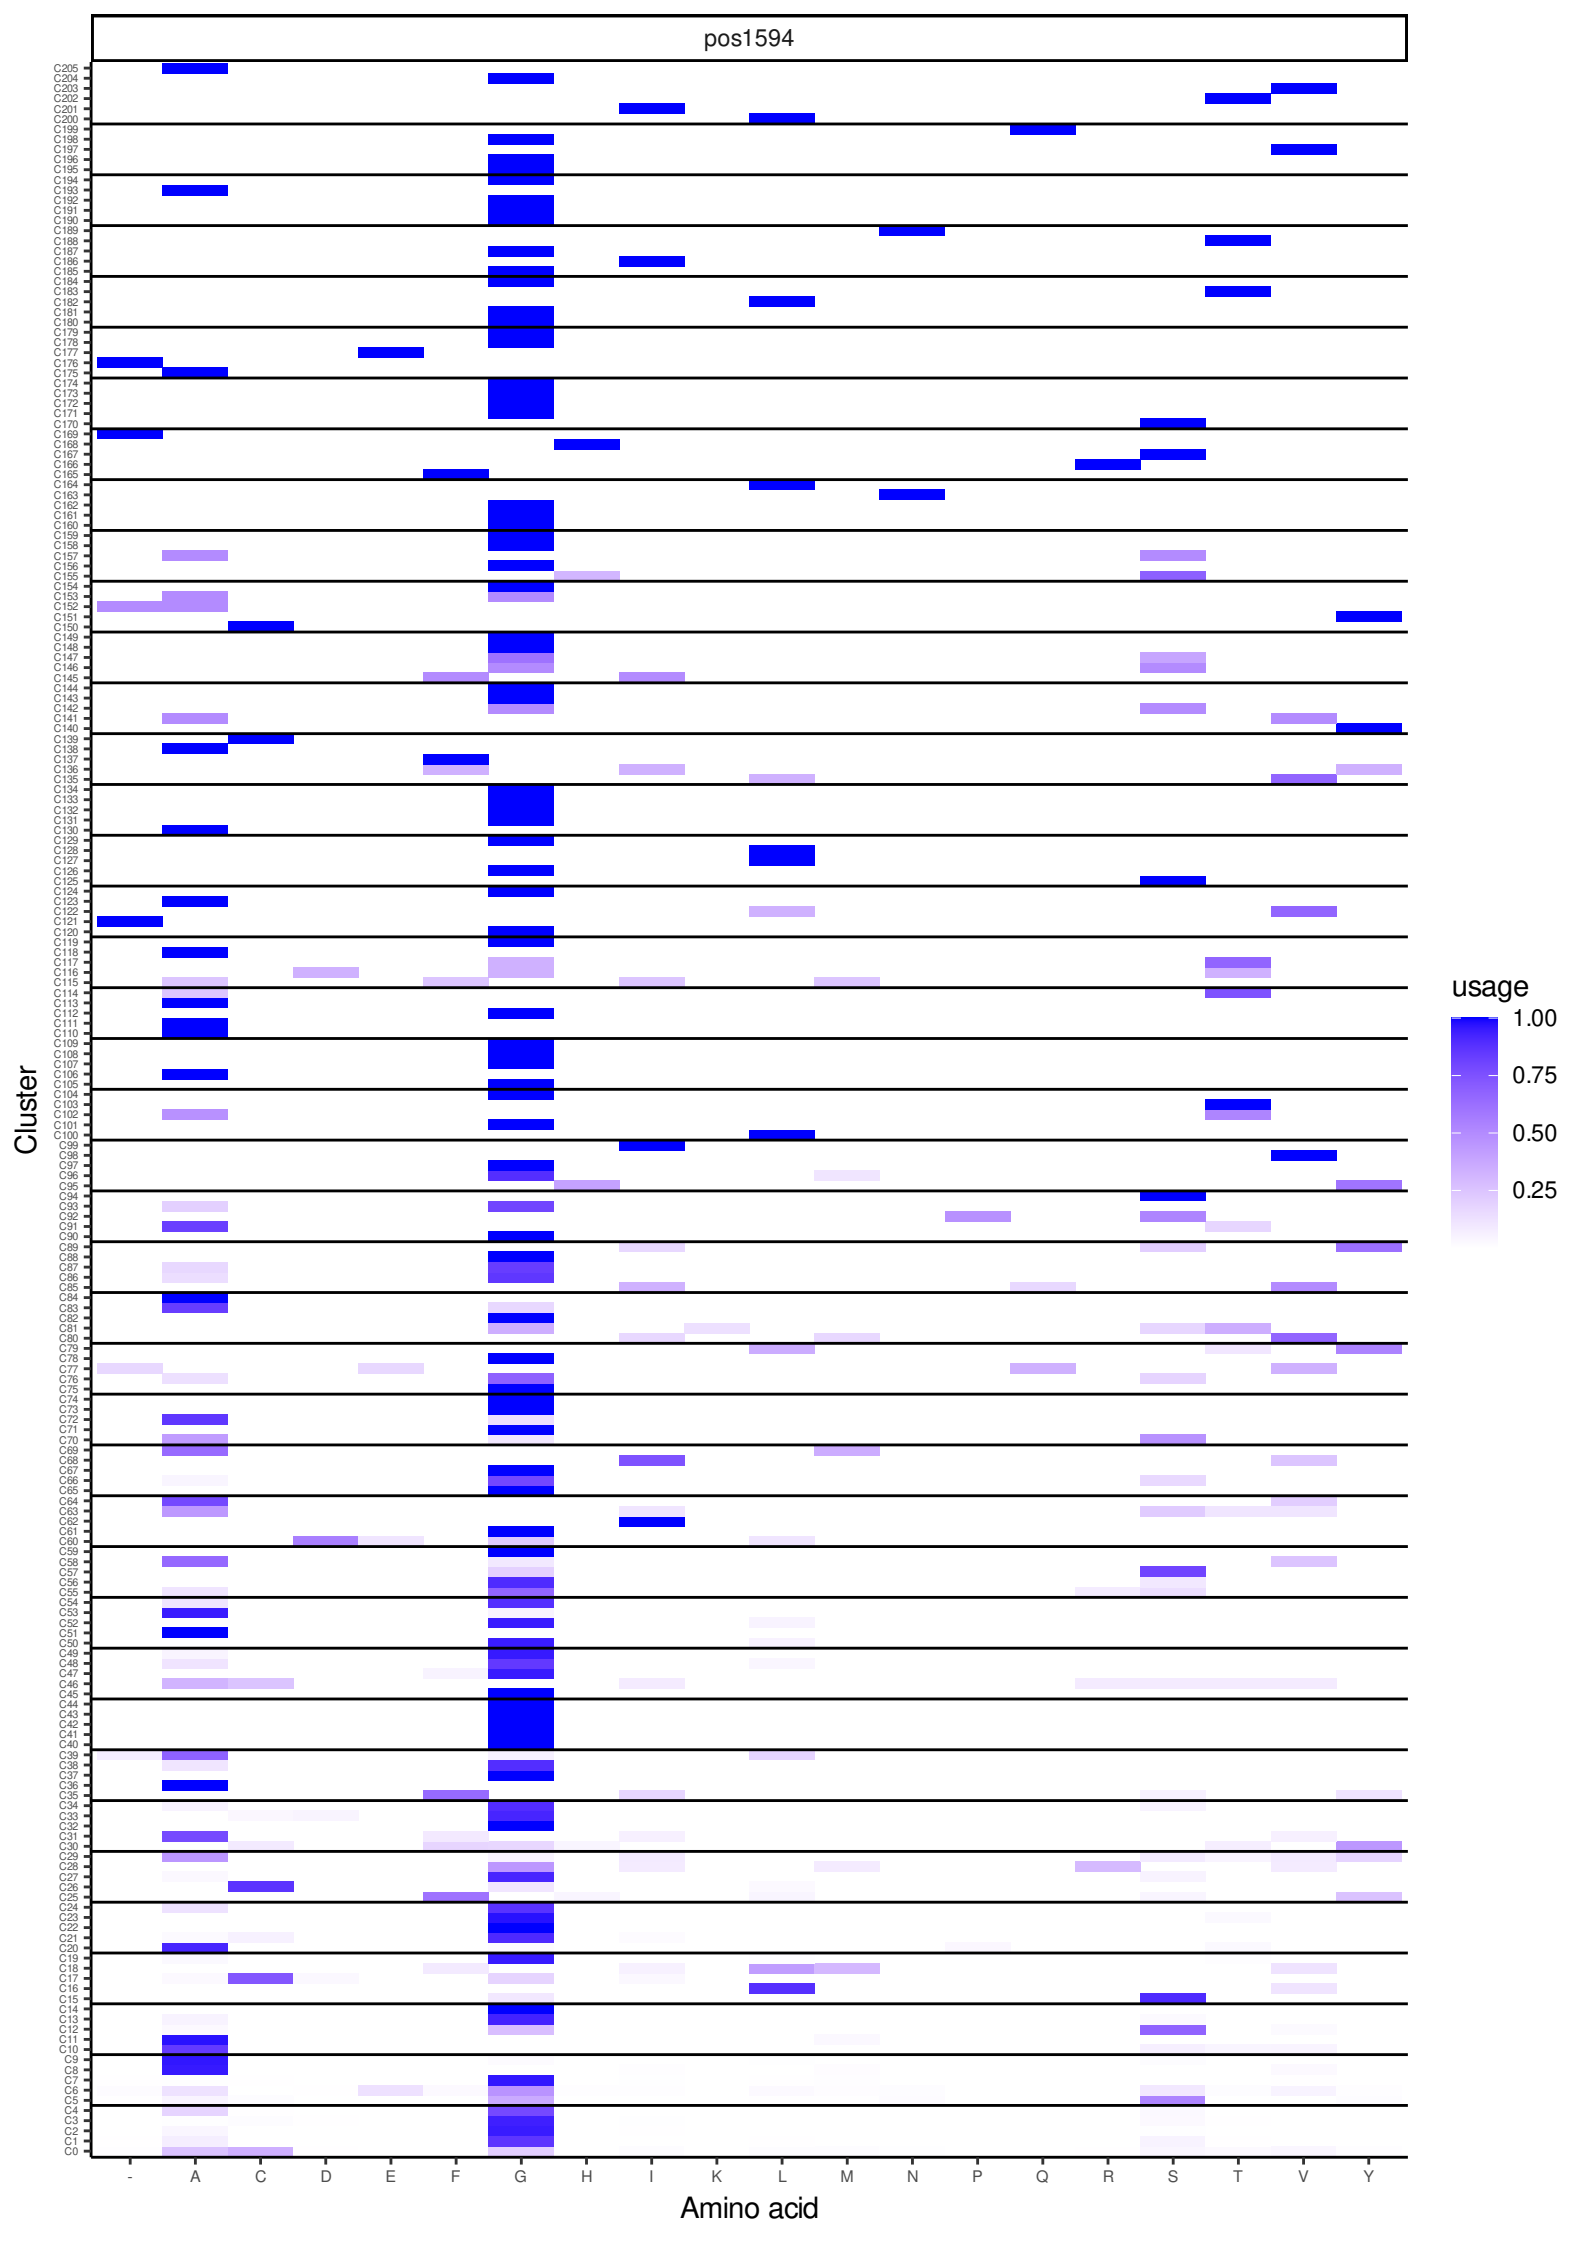

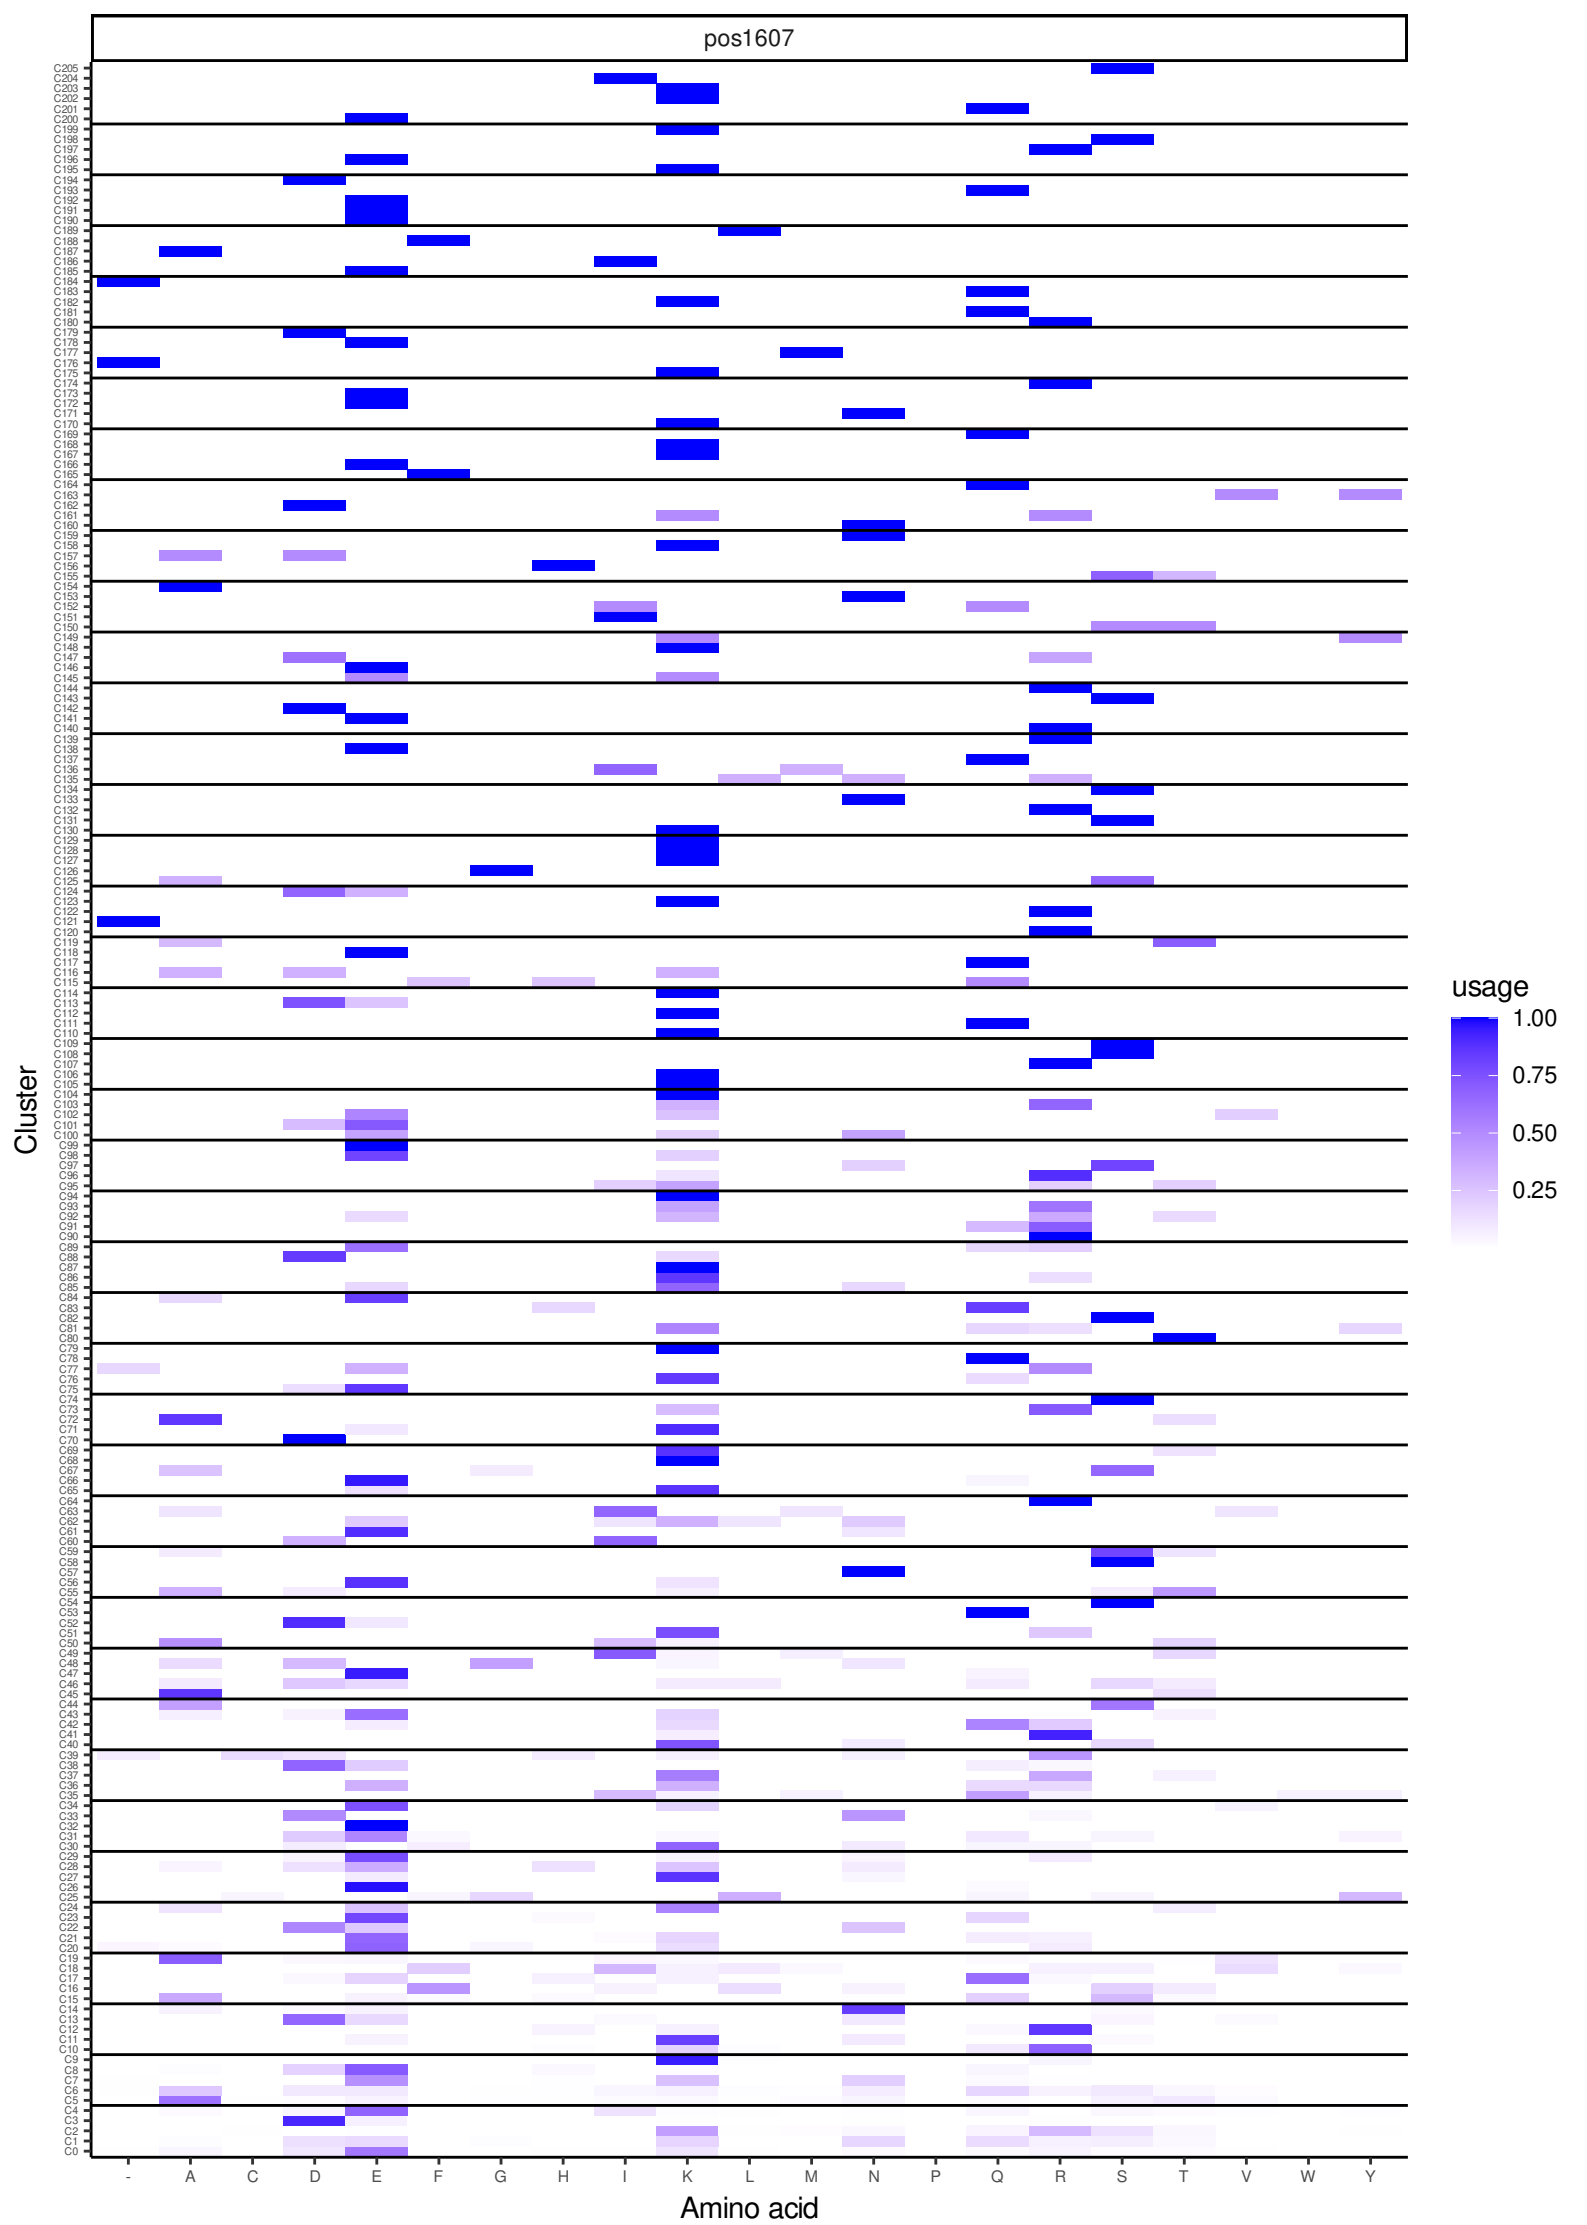

pos2345

Cluster

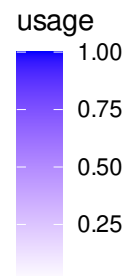

C205  
C204  
C203  
C202  
C201  
C200  
C199  
C198  
C197  
C196  
C195  
C194  
C193  
C192  
C191  
C190  
C189  
C188  
C187  
C186  
C185  
C184  
C183  
C182  
C181  
C180  
C179  
C178  
C177  
C176  
C175  
C174  
C173  
C172  
C171  
C170  
C169  
C168  
C167  
C166  
C165  
C164  
C163  
C162  
C161  
C160  
C159  
C158  
C157  
C156  
C155  
C154  
C153  
C152  
C151  
C150  
C149  
C148  
C147  
C146  
C145  
C144  
C143  
C142  
C141  
C140  
C139  
C138  
C137  
C136  
C135  
C134  
C133  
C132  
C131  
C130  
C129  
C128  
C127  
C126  
C125  
C124  
C123  
C122  
C121  
C120  
C119  
C118  
C117  
C116  
C115  
C114  
C113  
C112  
C111  
C110  
C109  
C108  
C107  
C106  
C105  
C104  
C103  
C102  
C101  
C100  
C99  
C98  
C97  
C96  
C95  
C94  
C93  
C92  
C91  
C90  
C89  
C88  
C87  
C86  
C85  
C84  
C83  
C82  
C81  
C80  
C79  
C78  
C77  
C76  
C75  
C74  
C73  
C72  
C71  
C70  
C69  
C68  
C67  
C66  
C65  
C64  
C63  
C62  
C61  
C60  
C59  
C58  
C57  
C56  
C55  
C54  
C53  
C52  
C51  
C50  
C49  
C48  
C47  
C46  
C45  
C44  
C43  
C42  
C41  
C40  
C39  
C38  
C37  
C36  
C35  
C34  
C33  
C32  
C31  
C30  
C29  
C28  
C27  
C26  
C25  
C24  
C23  
C22  
C21  
C20  
C19  
C18  
C17  
C16  
C15  
C14  
C13  
C12  
C11  
C10  
C9  
C8  
C7  
C6  
C5  
C4  
C3  
C2  
C1

Amino acid

- A C D E F G H I K L M N P Q R S T V W Y

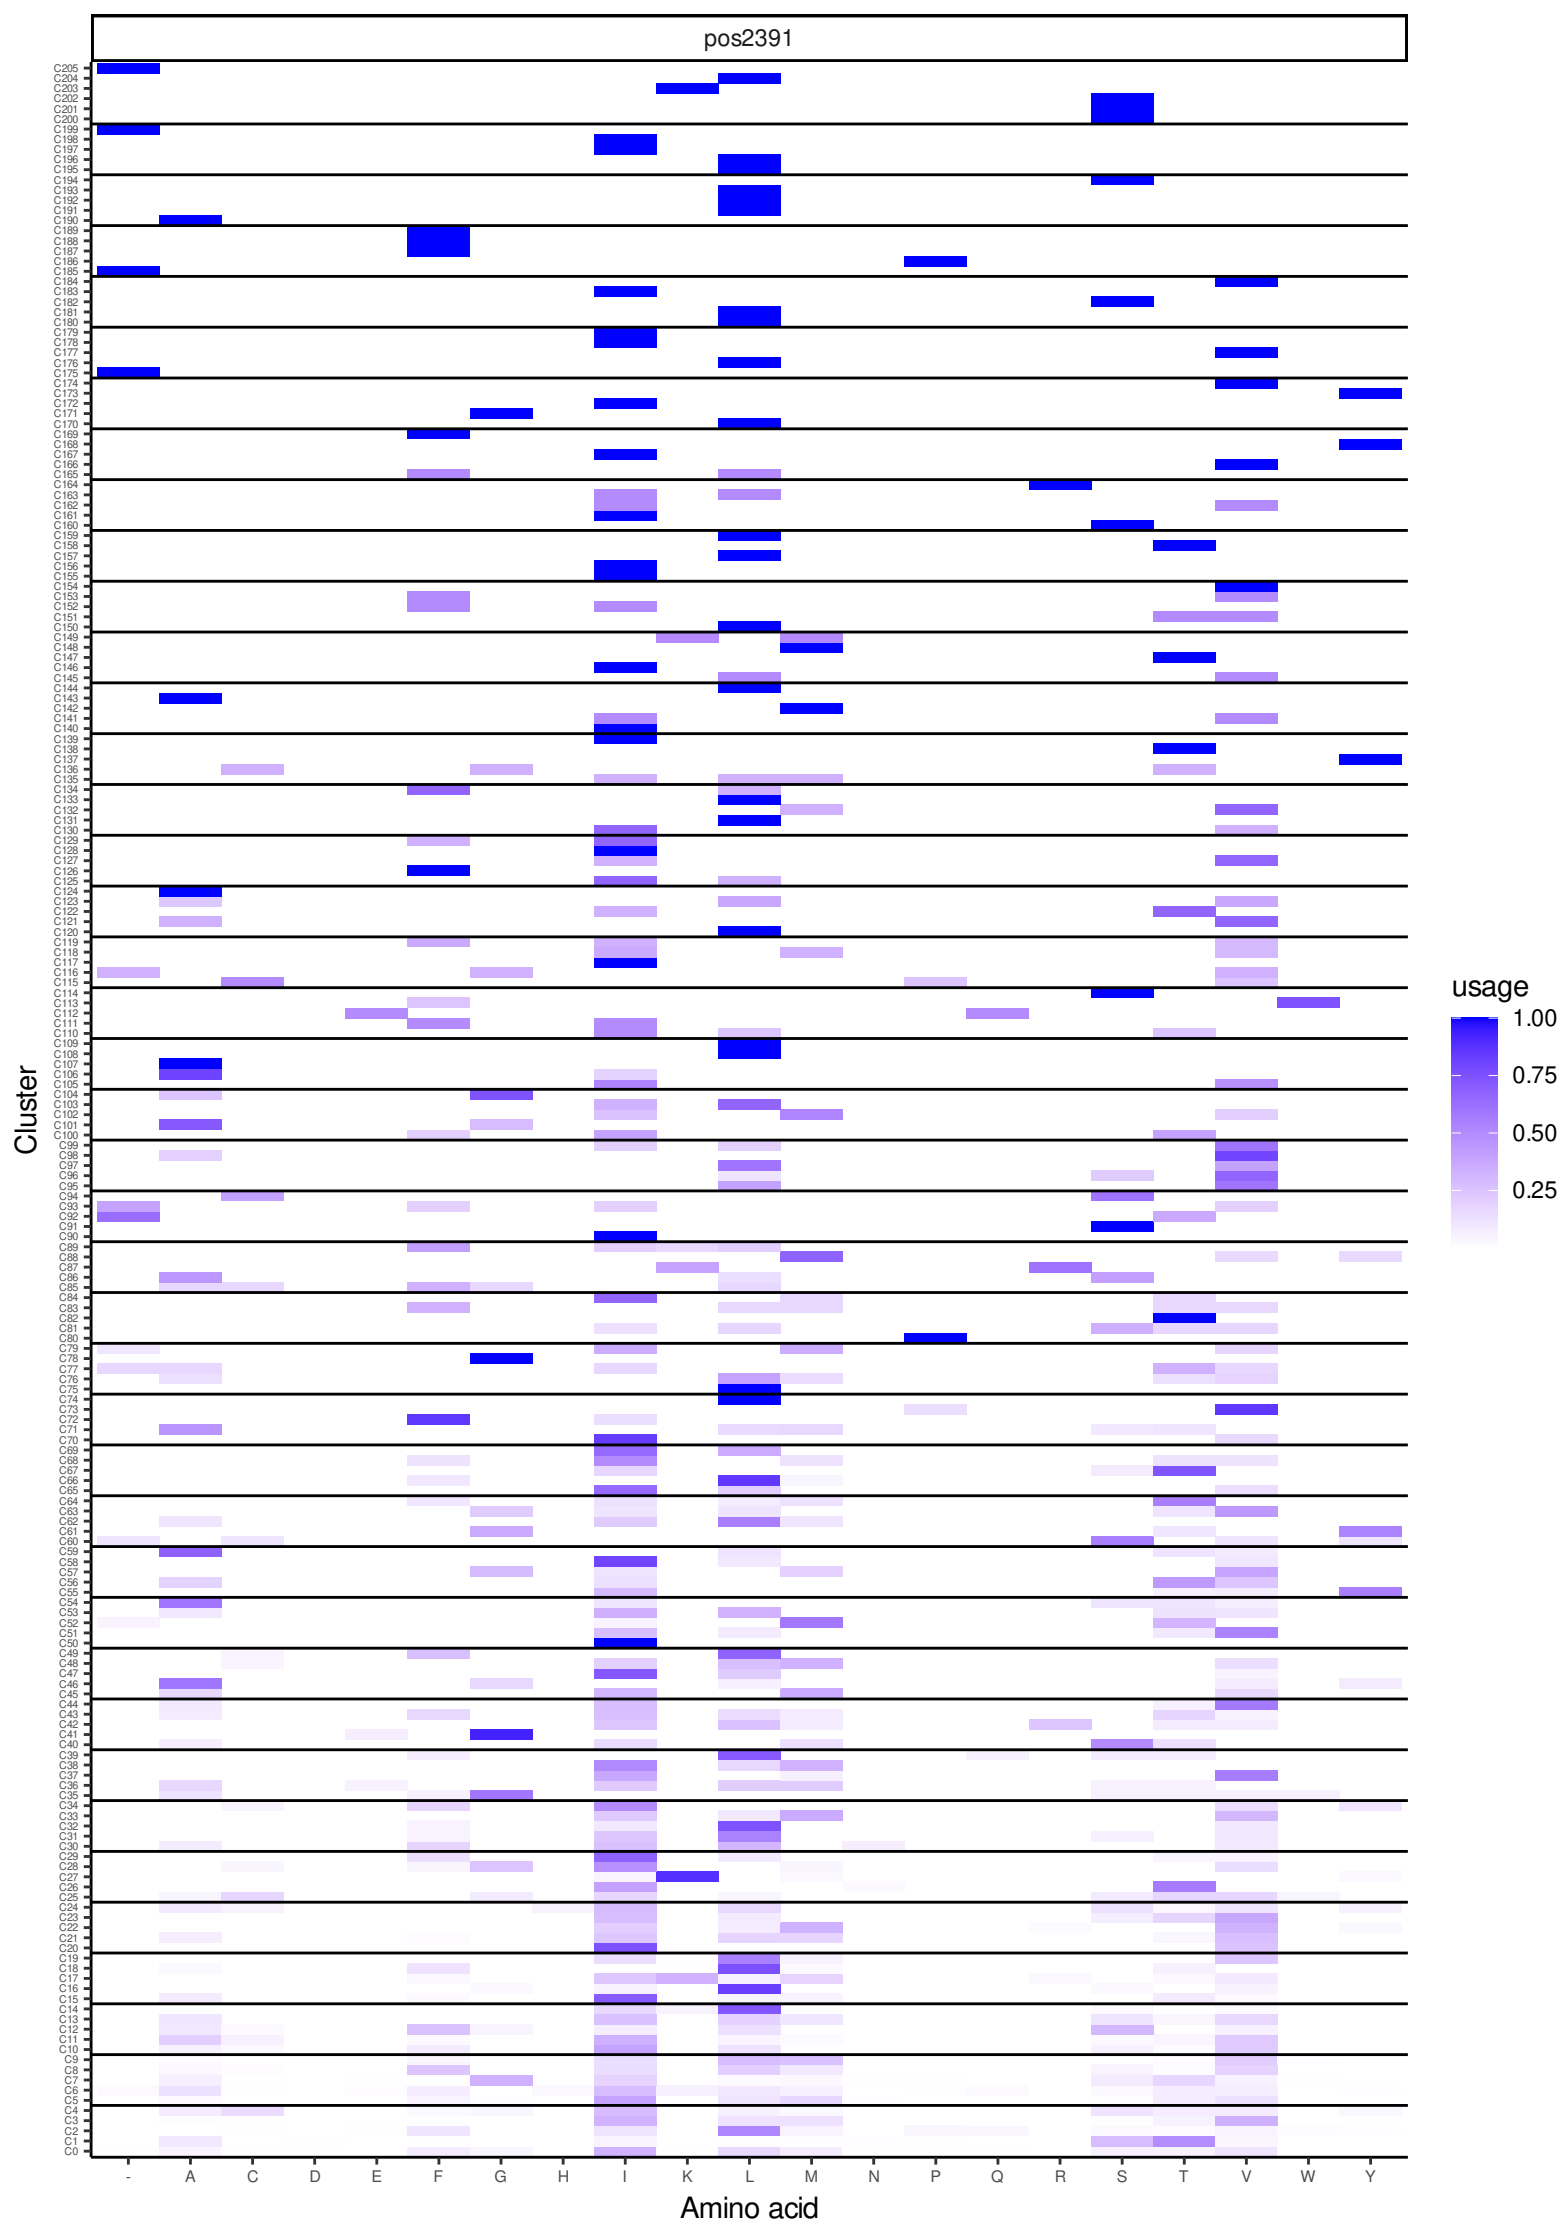

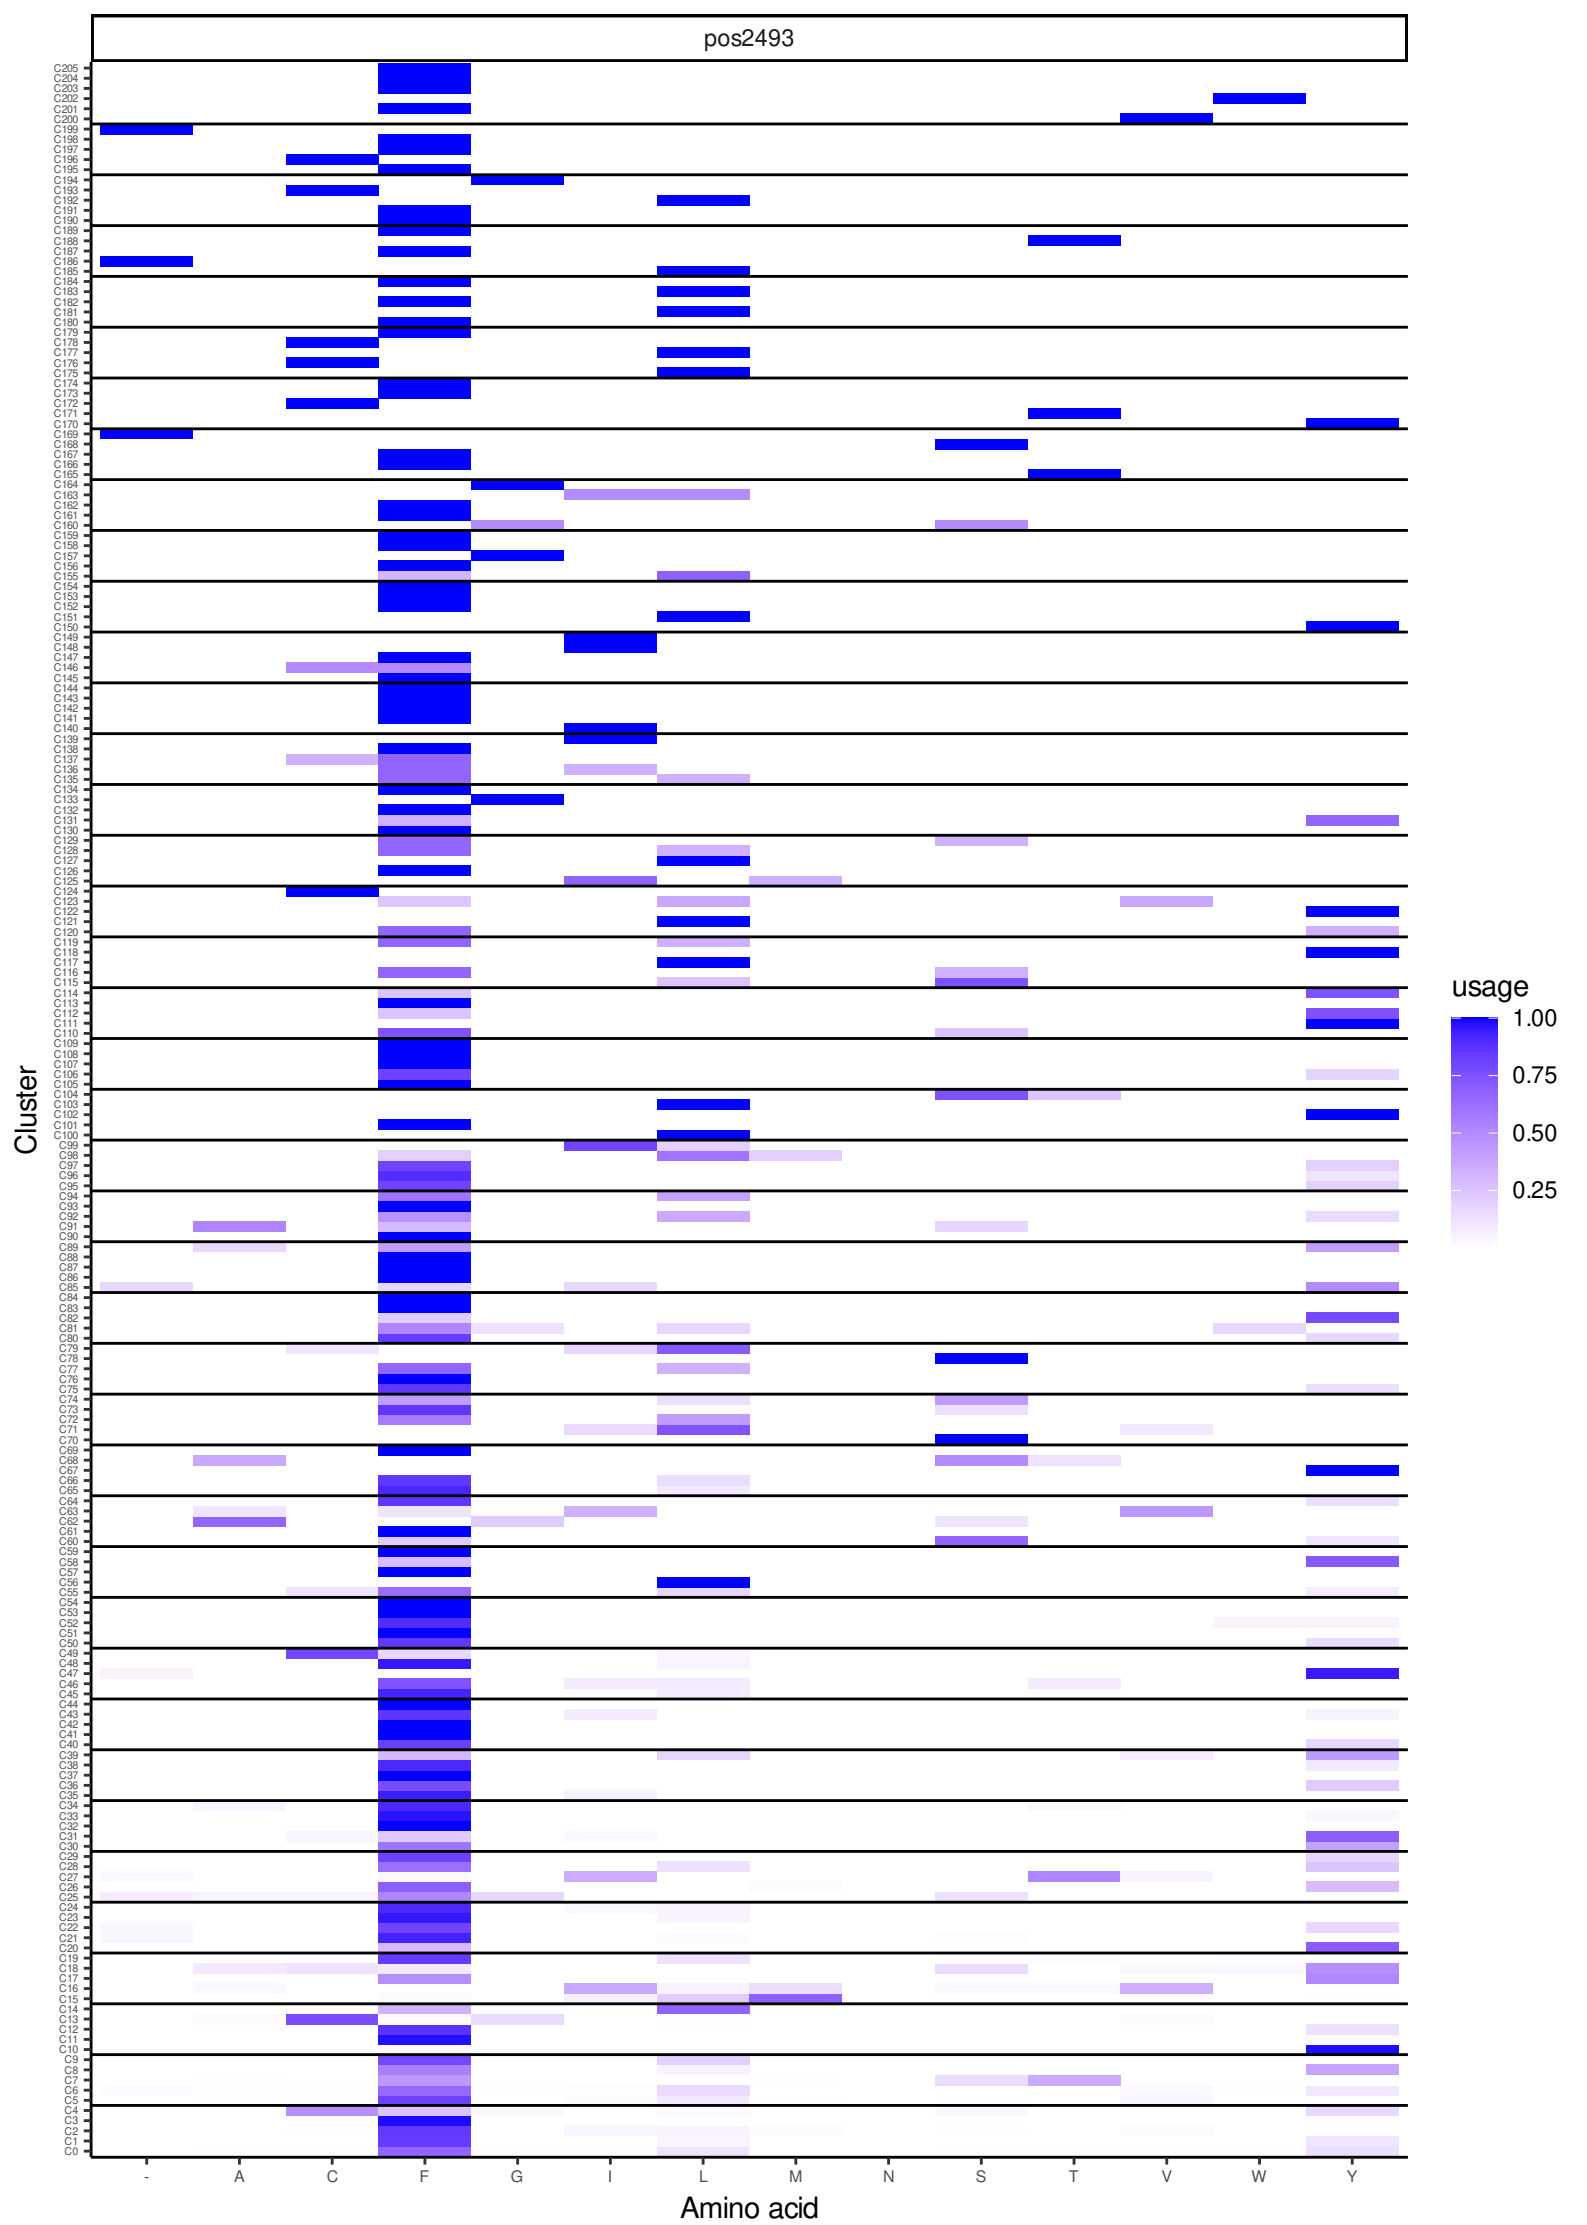

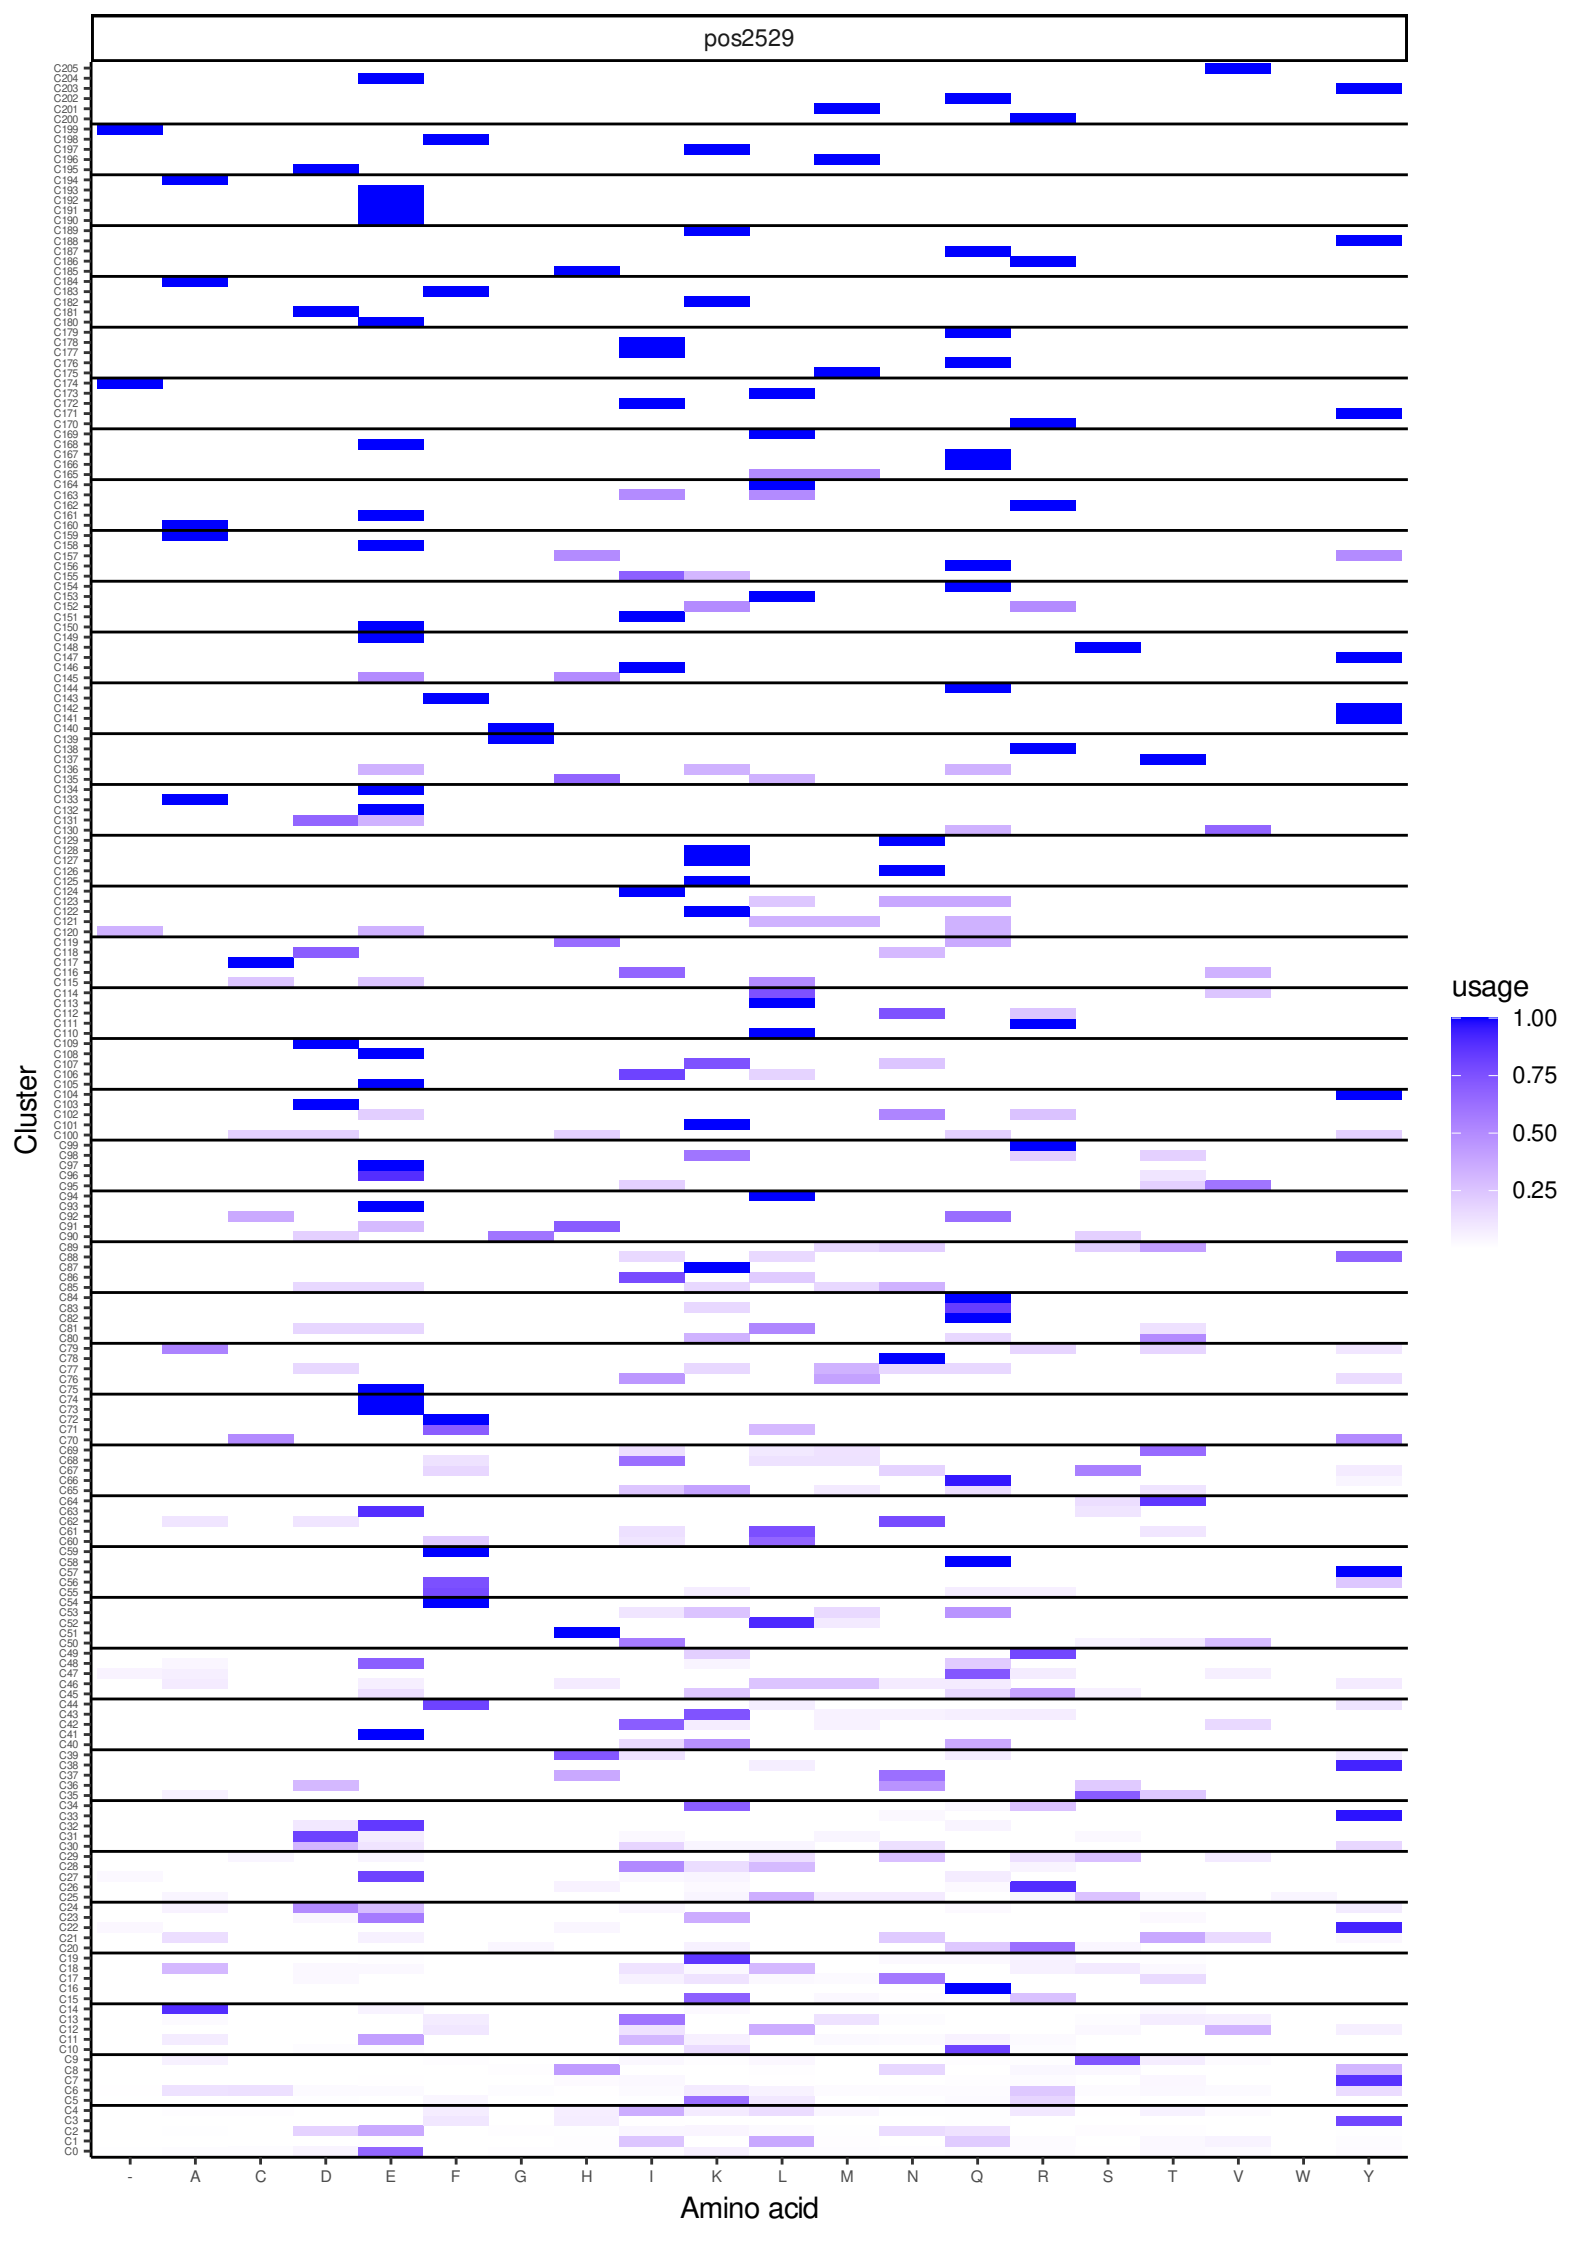

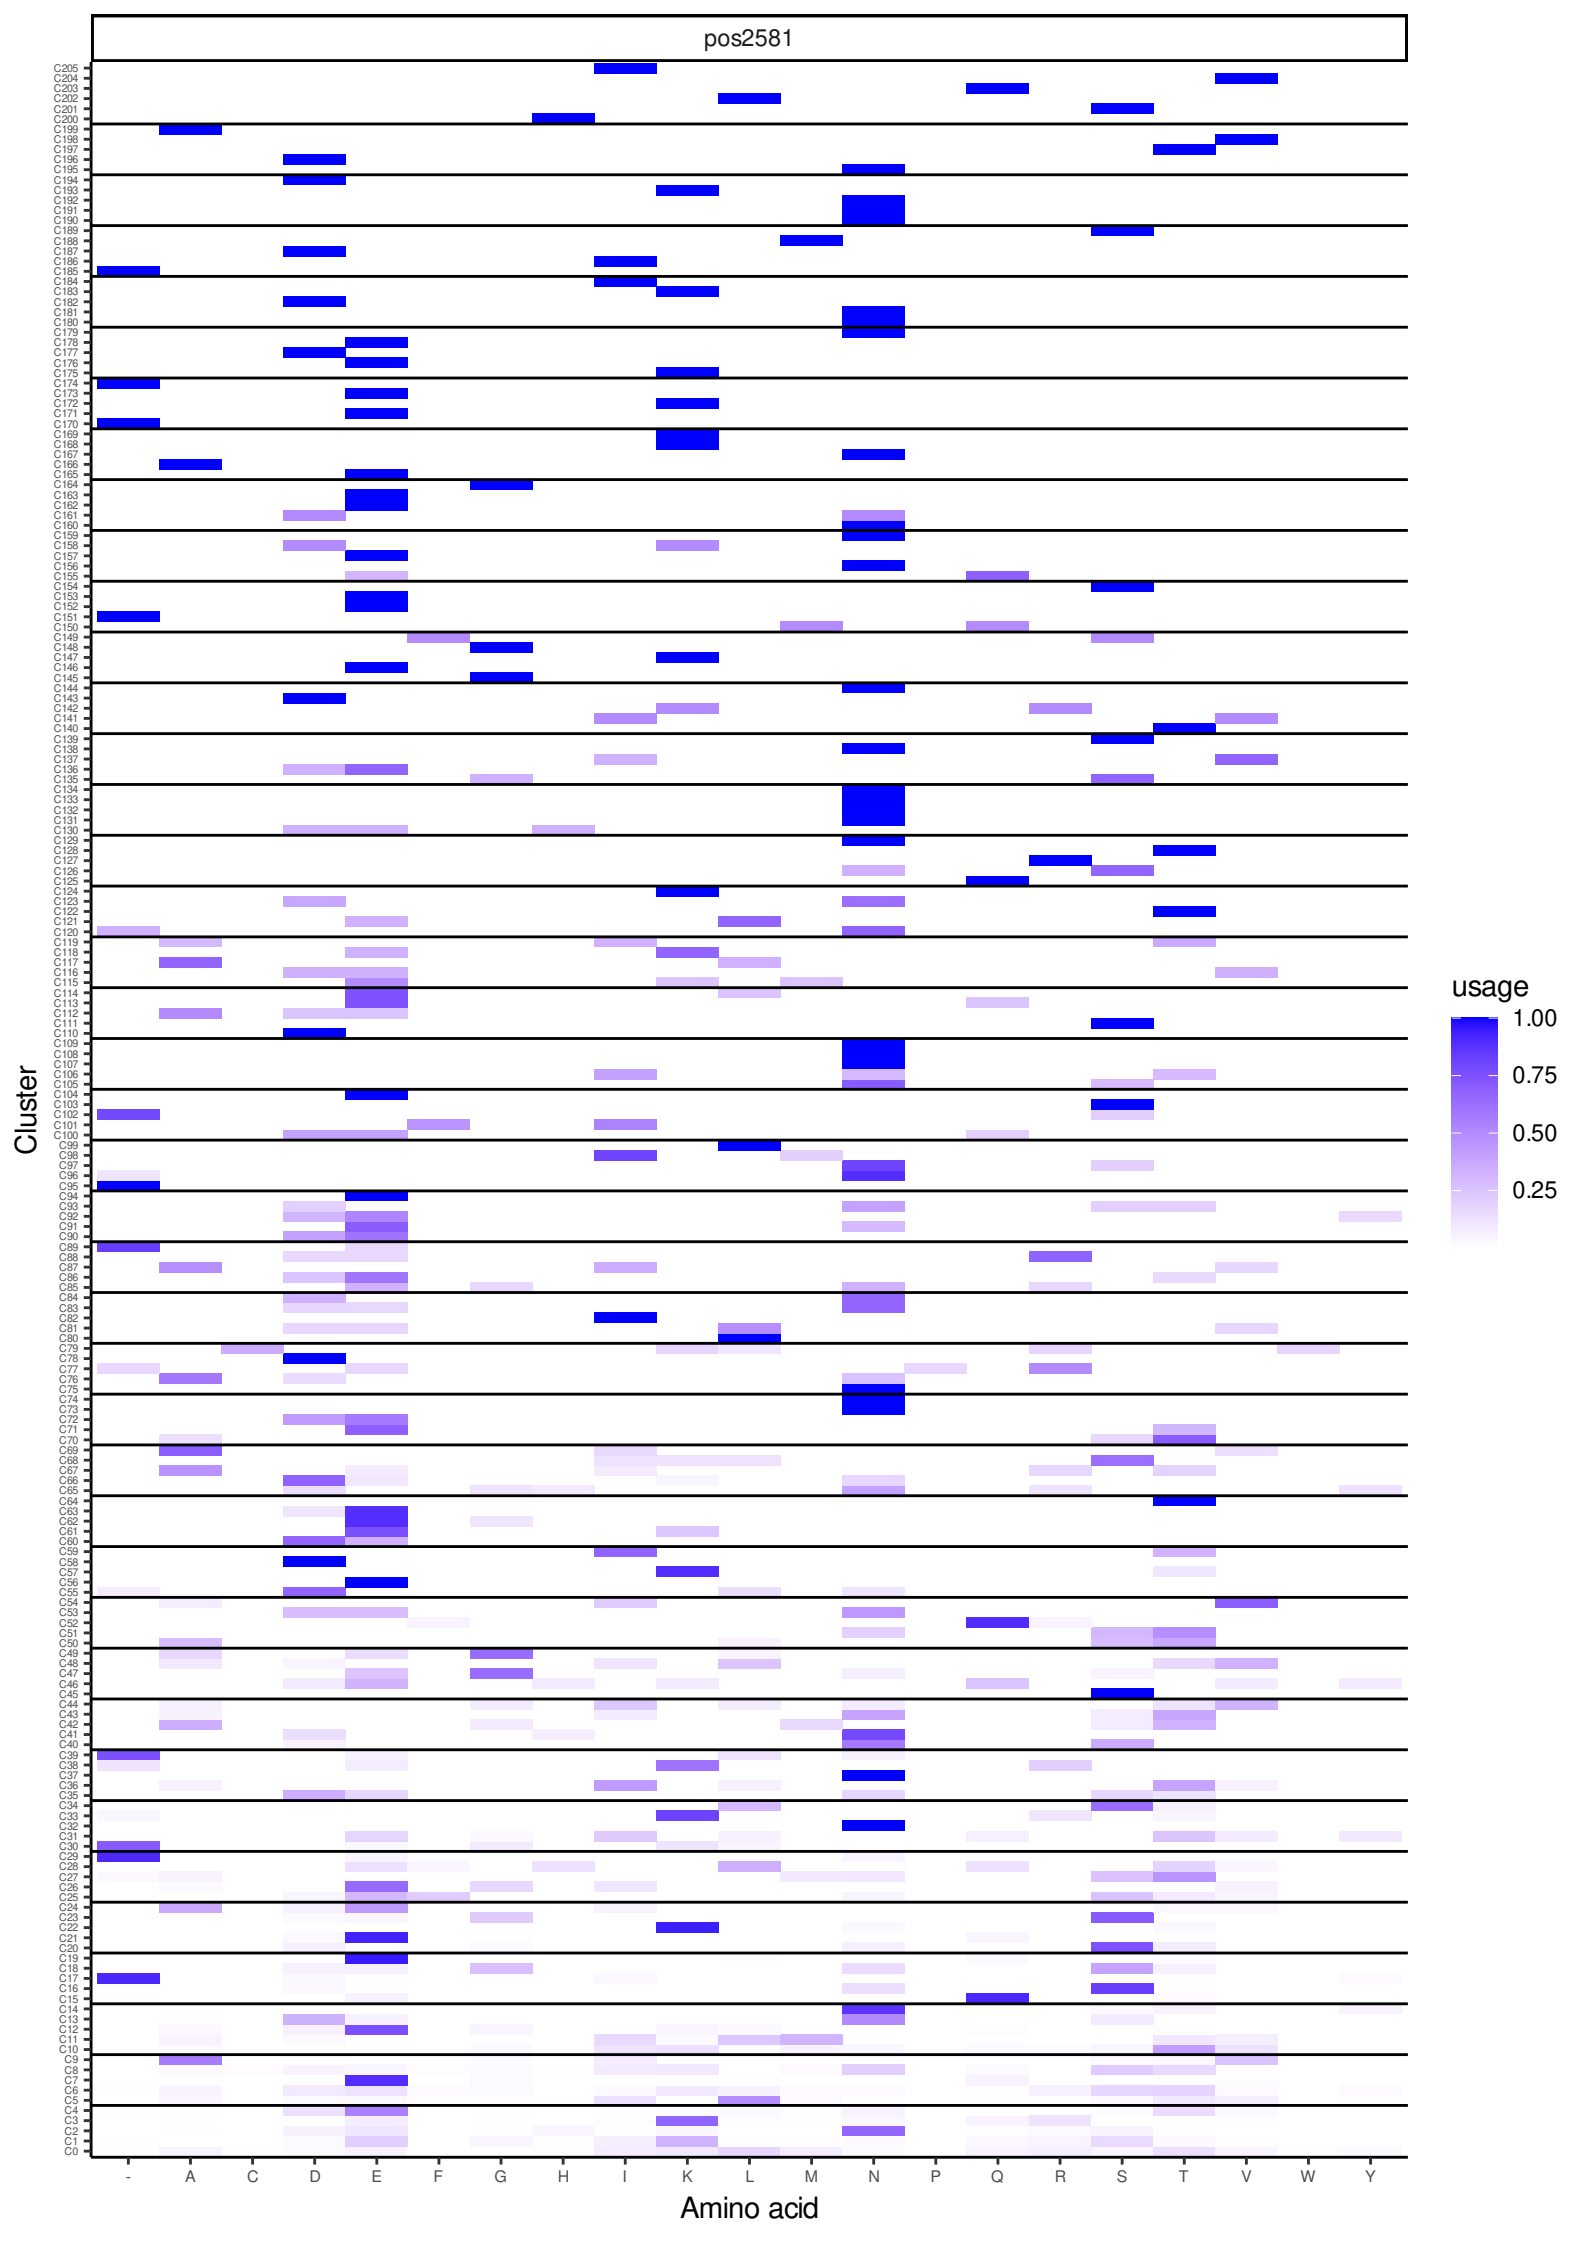



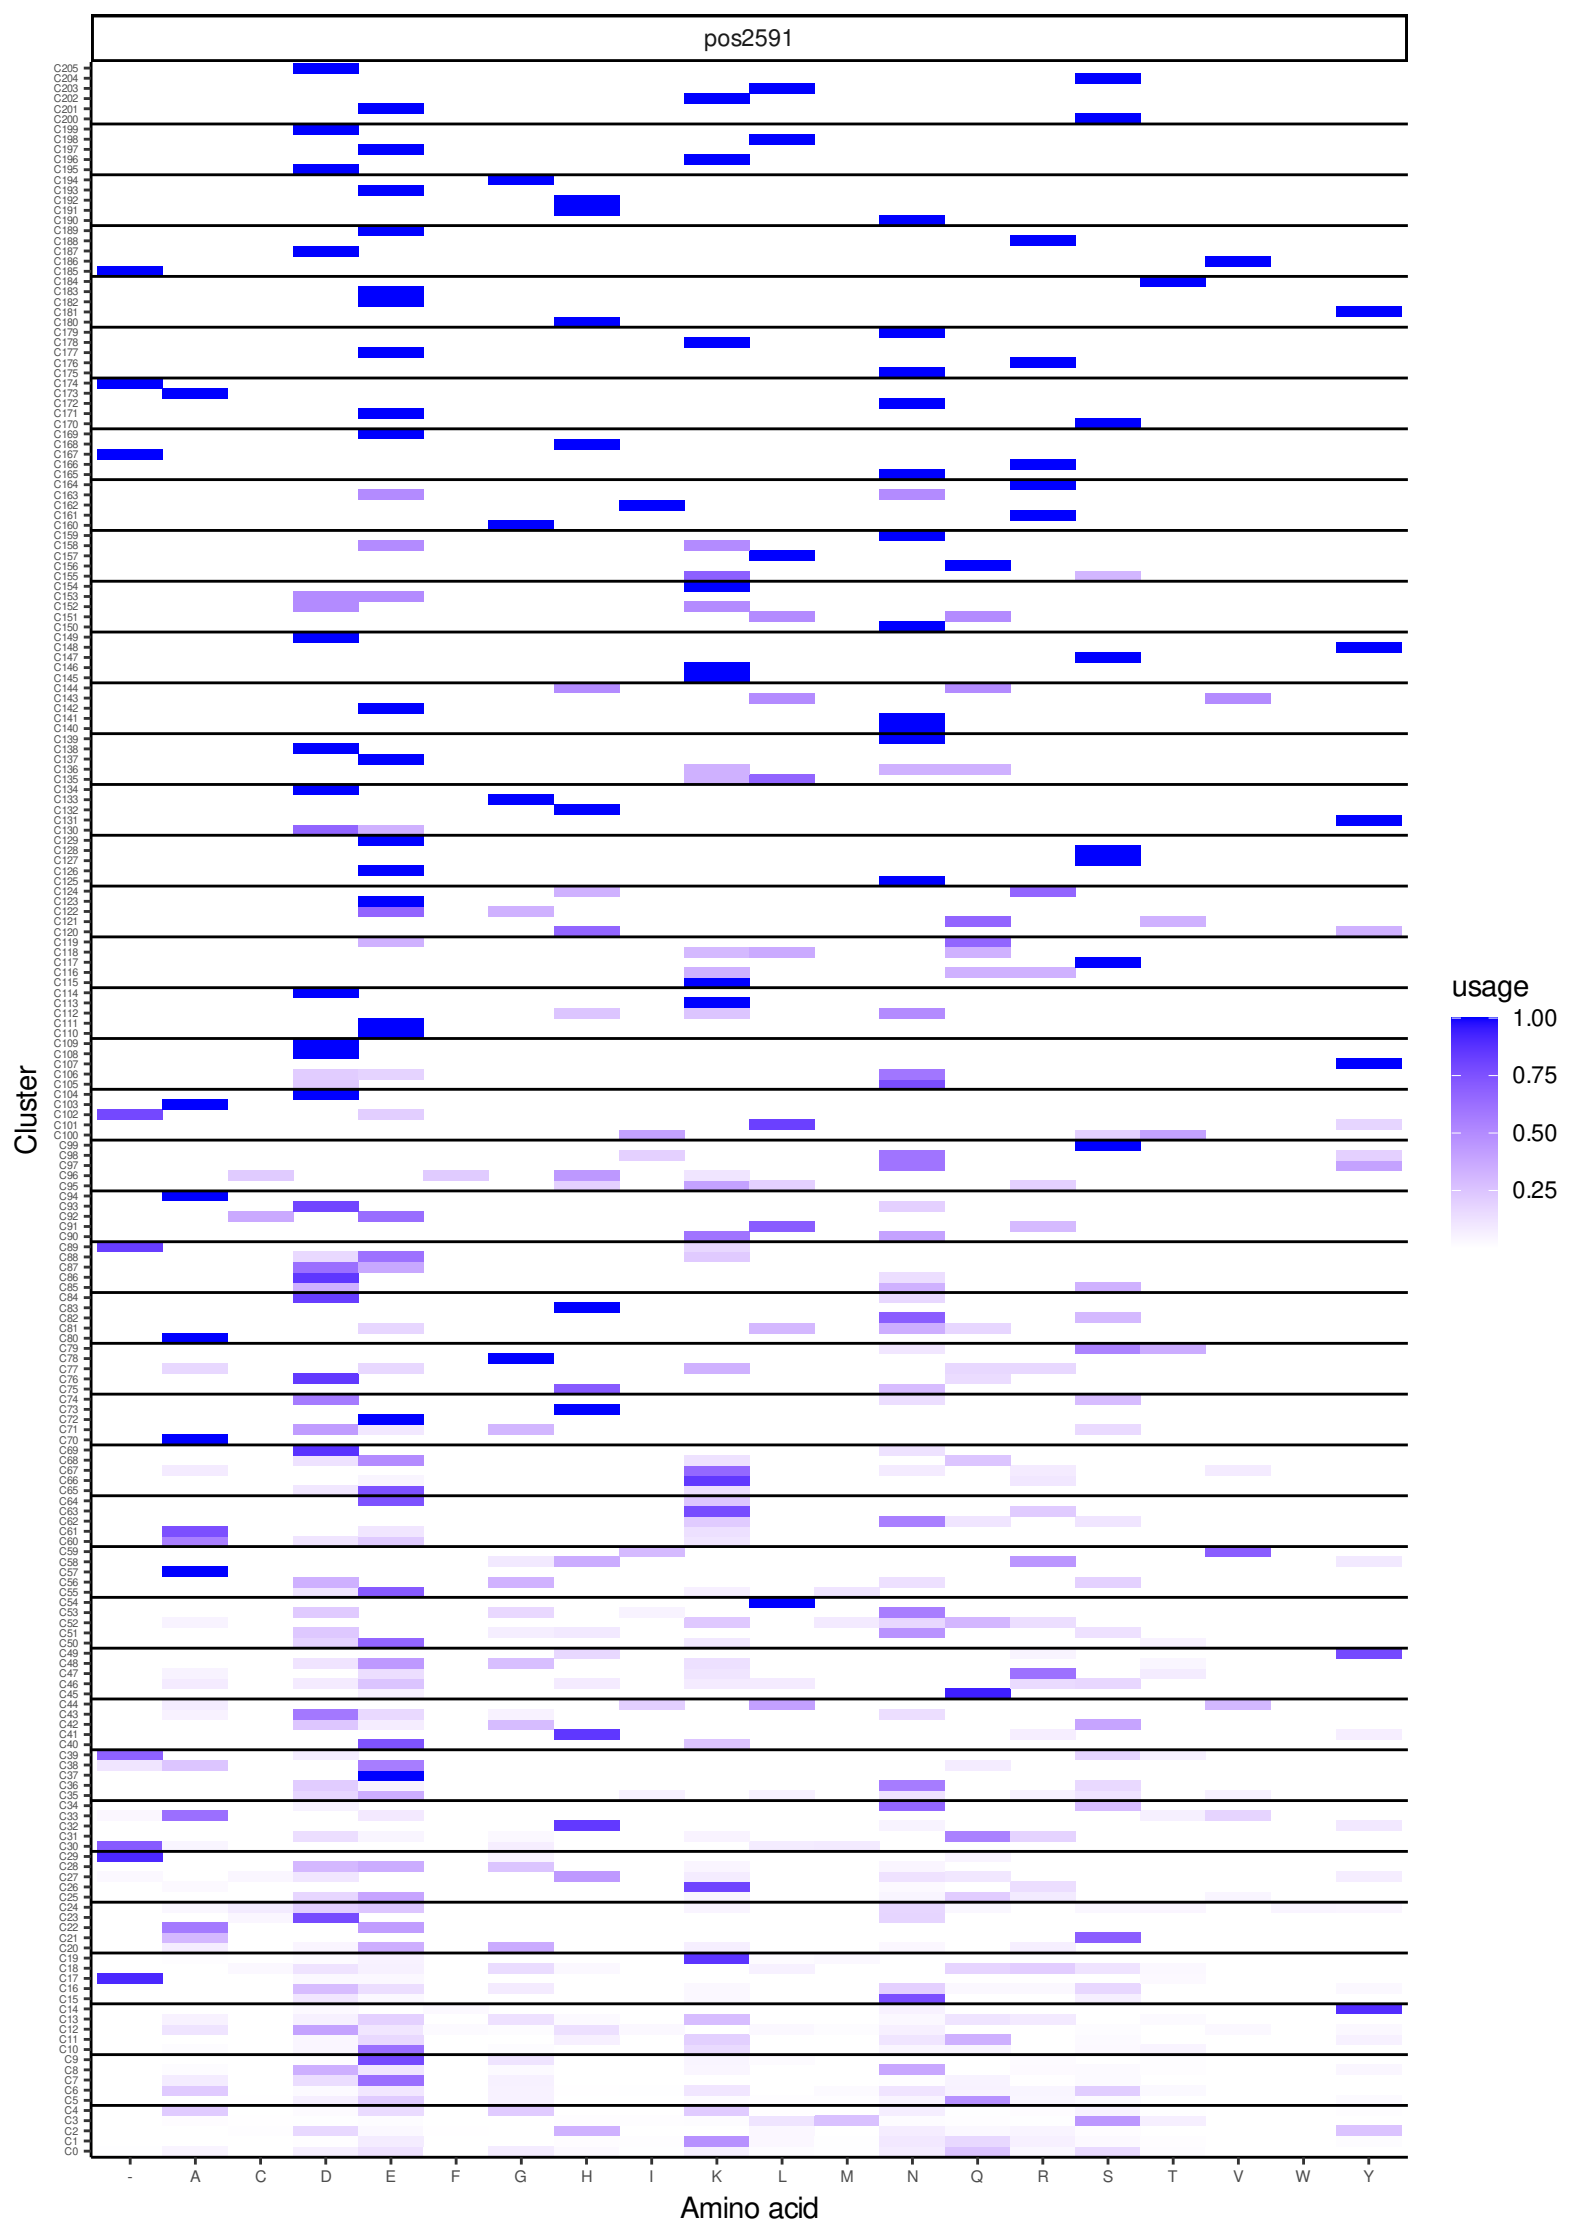

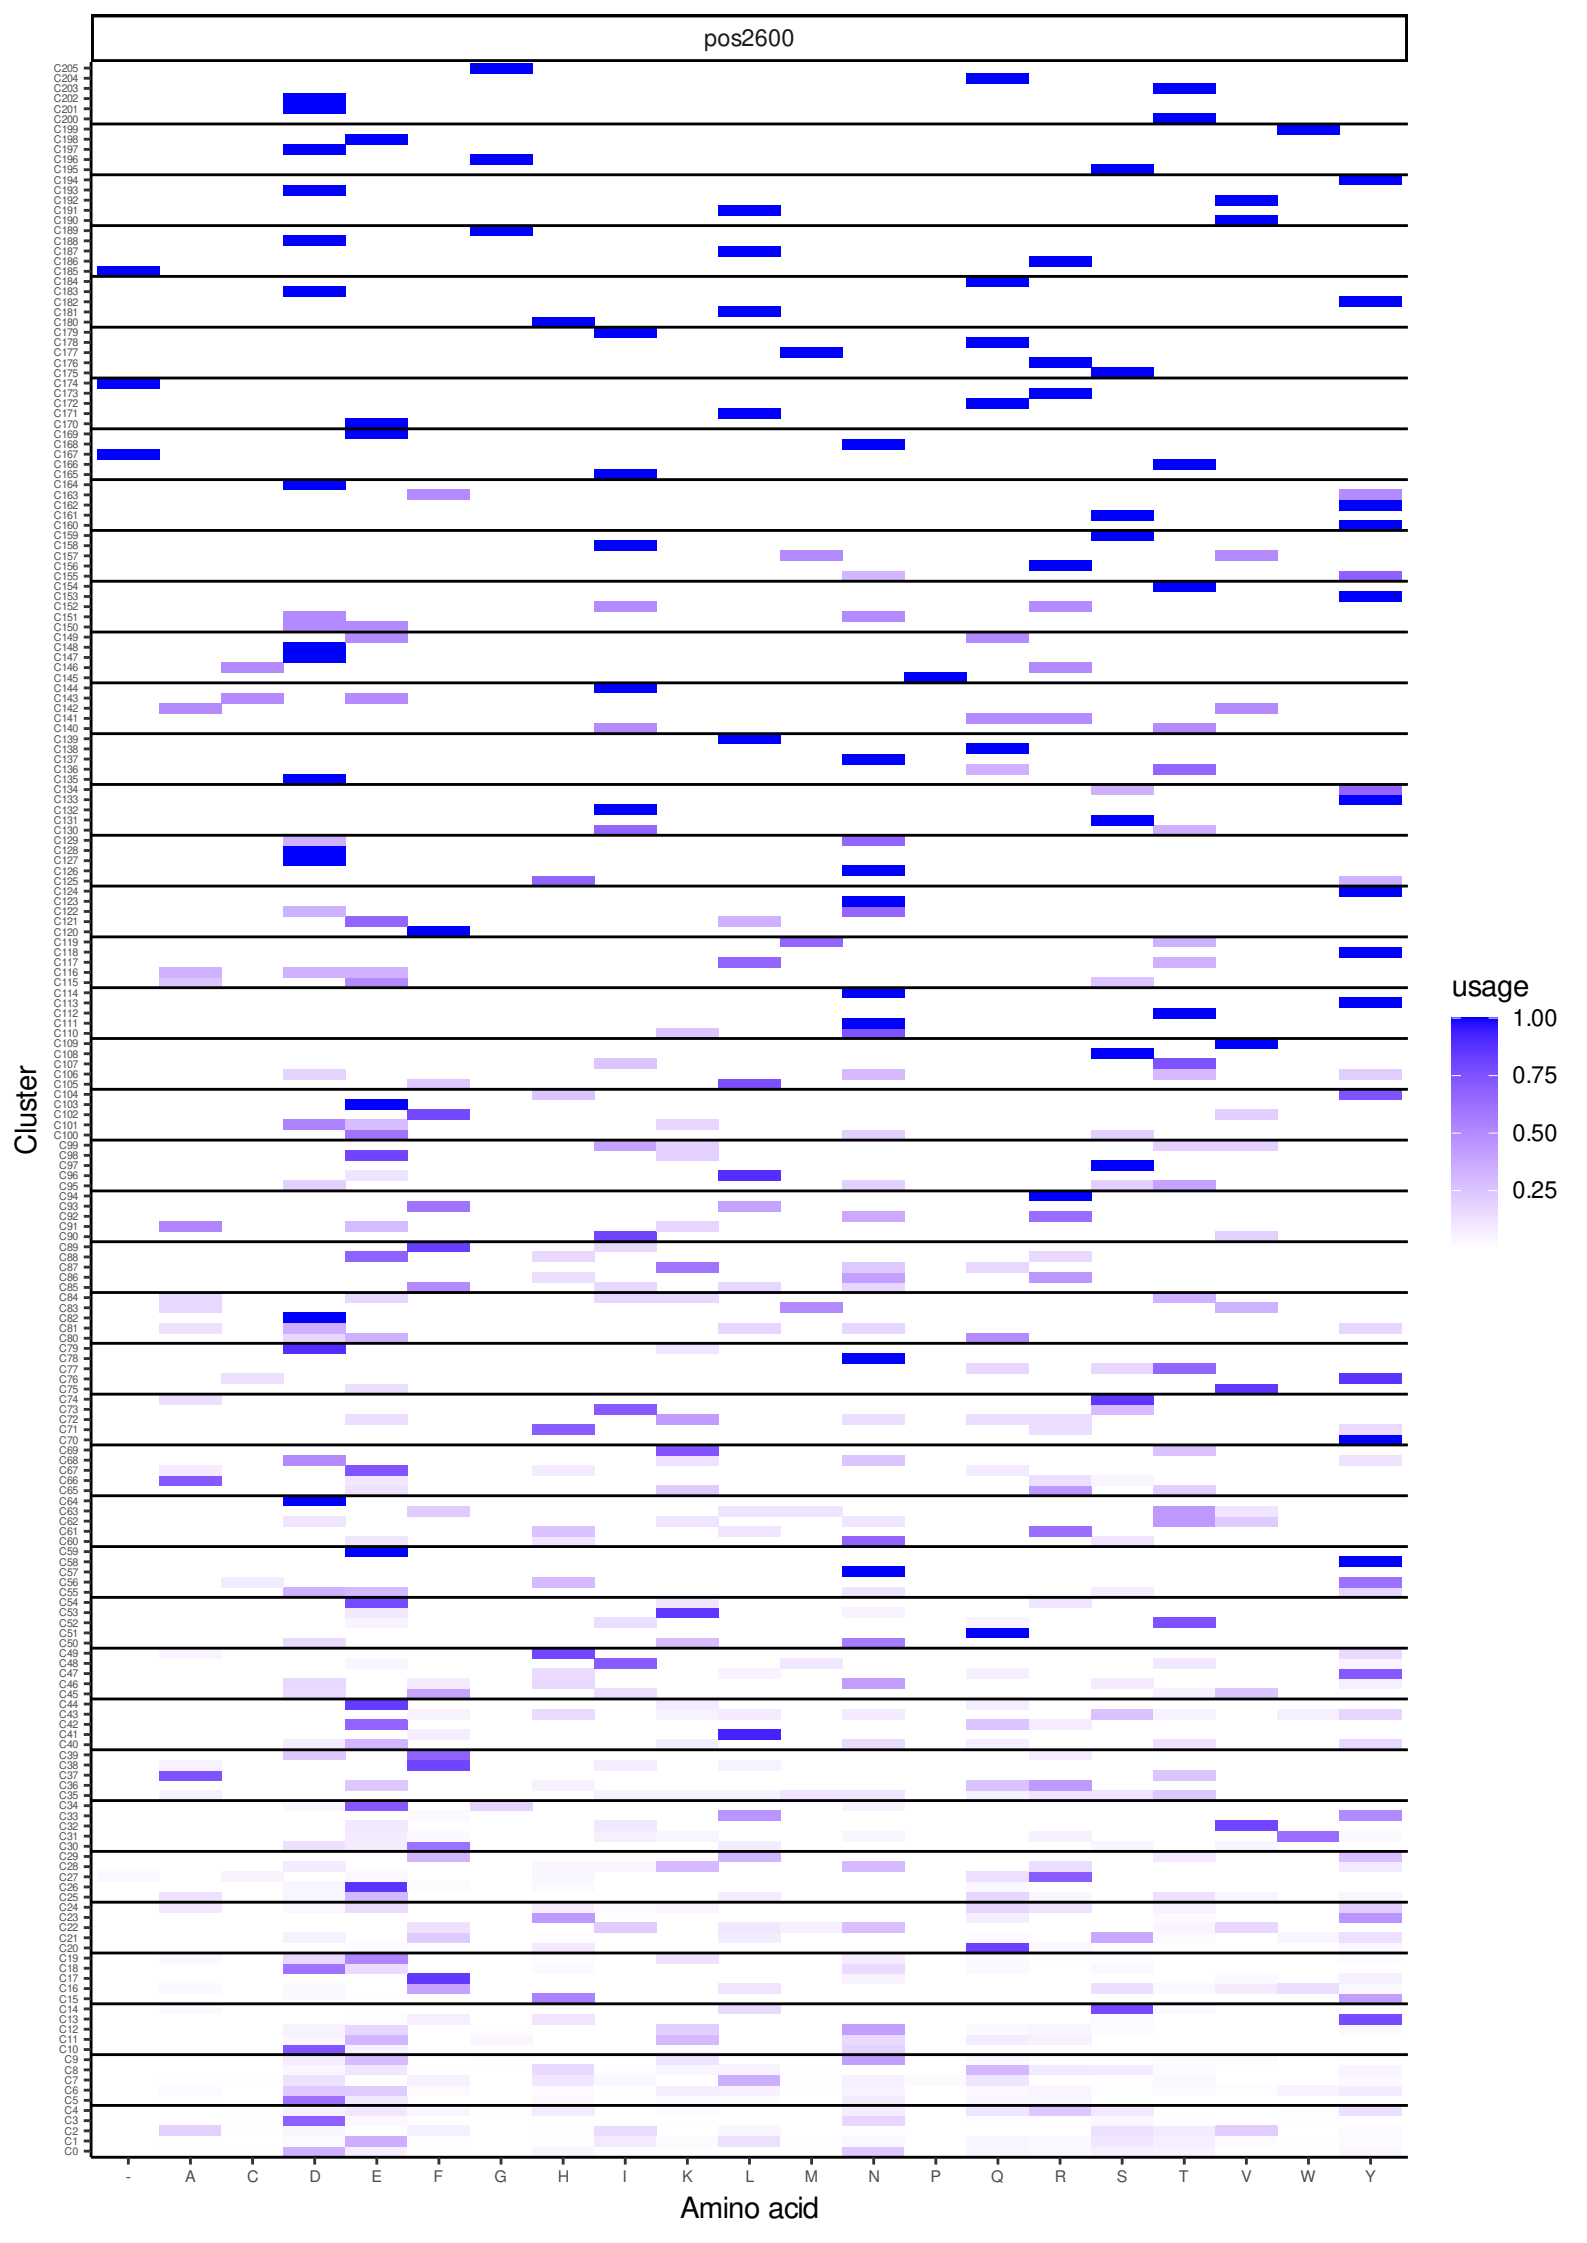

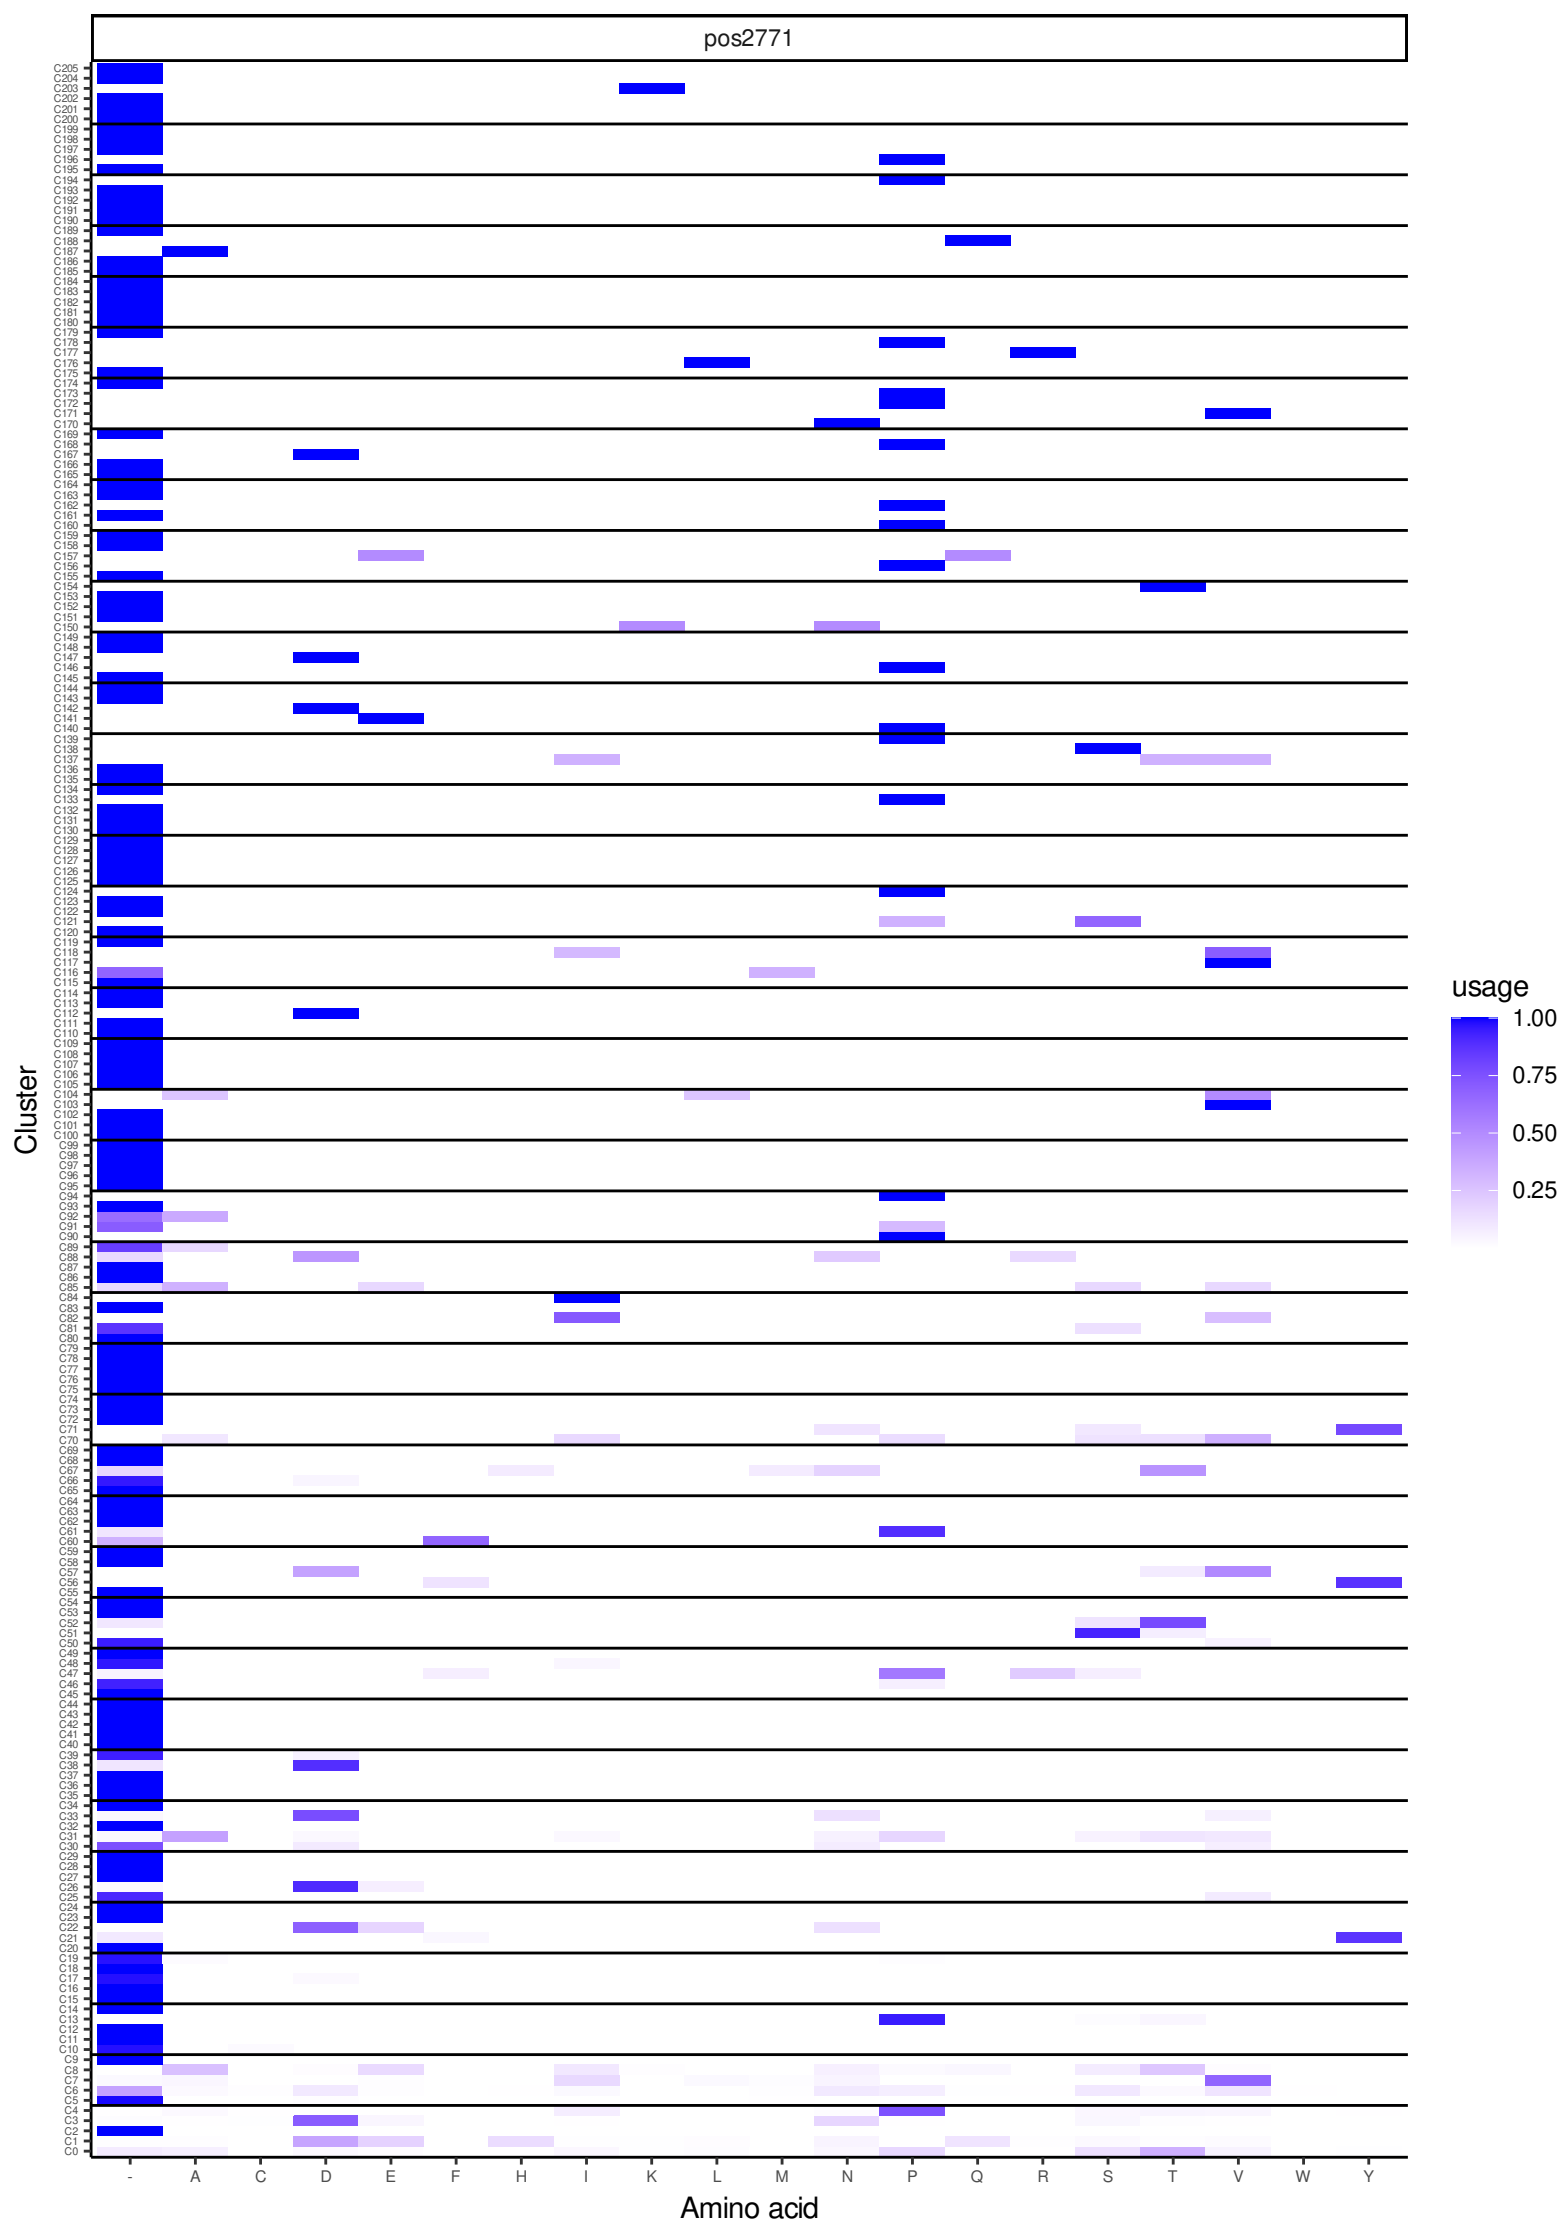

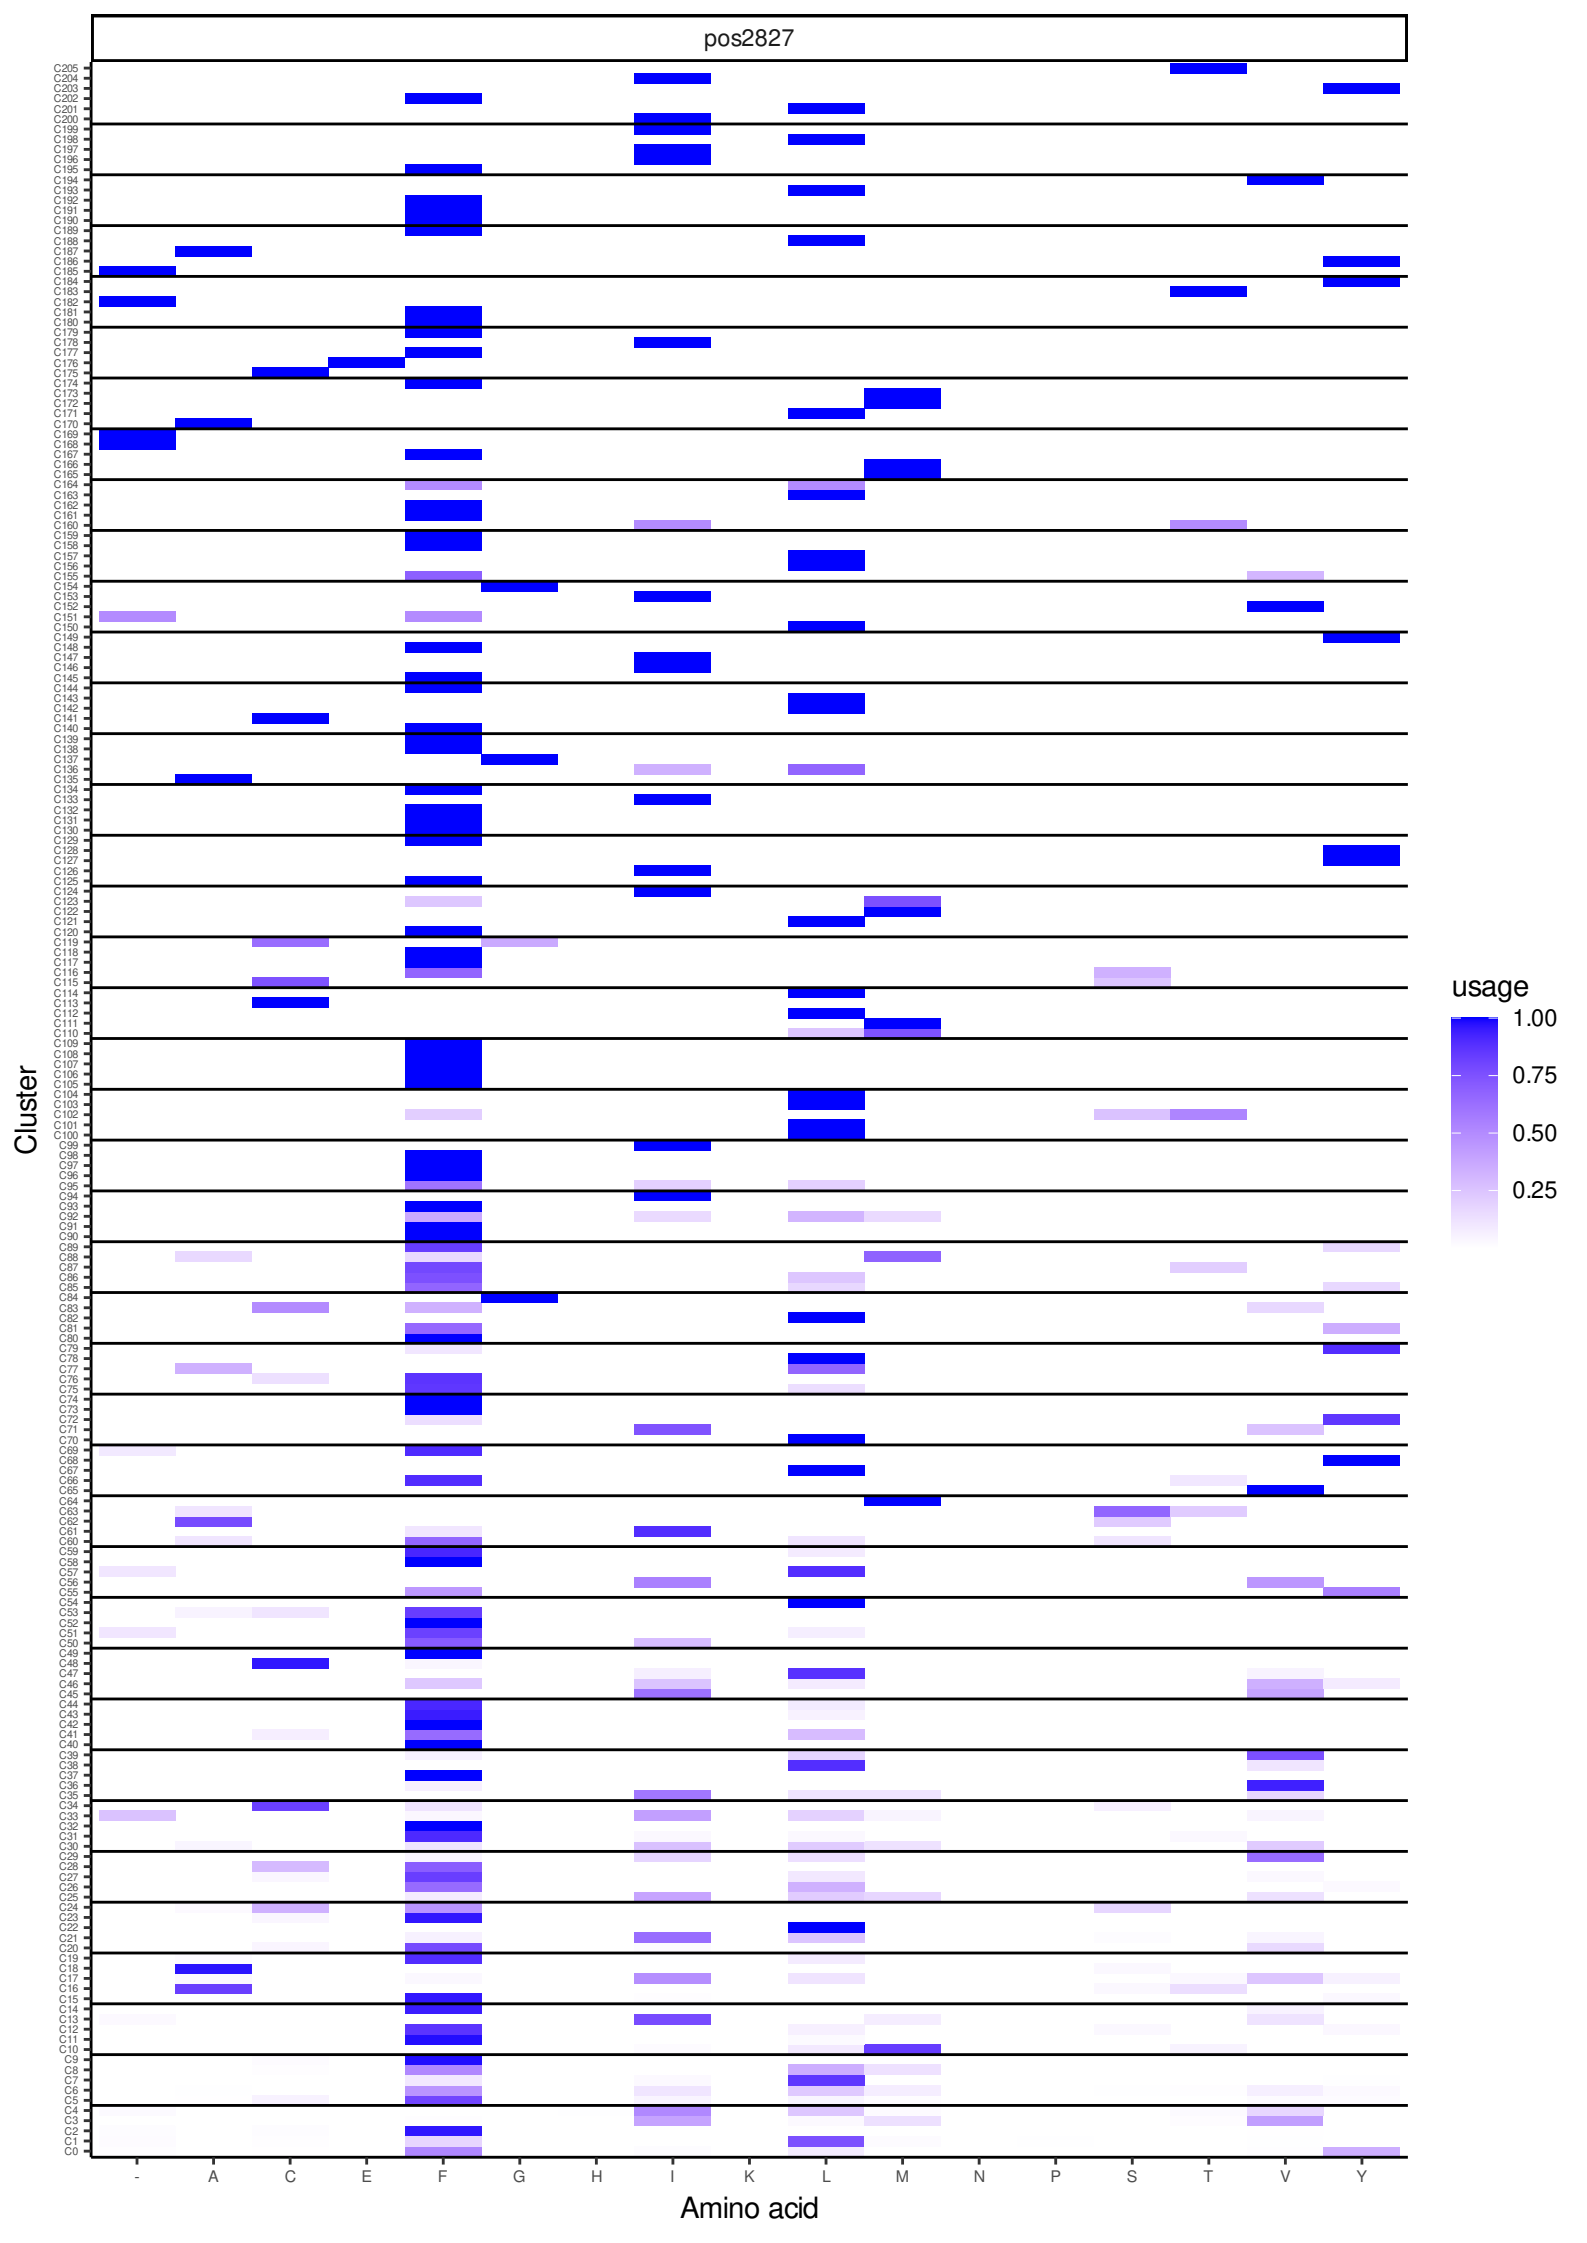

Supplement: s1 [file s1]
