# Supplementary material for: Annotation and Analysis of 3902 Odorant Receptor Protein Sequences from 21 Insect Species Provide Insights into the Evolution of Odorant Receptor Gene Families in Solitary and Social Insects
Source: MDPI journal article supplement (doi:10.3390/genes13050919), 2022-05-20

# Cross-Validation Performance

dataset A. gambiae D. melanogaster H. saltator

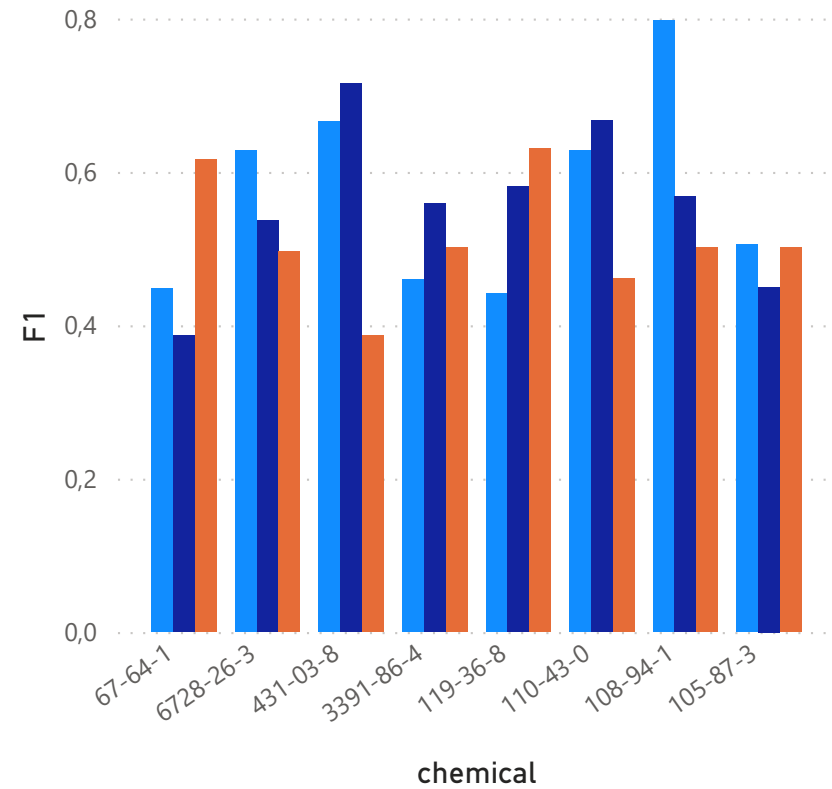

dataset A. gambiae D. melanogaster H. saltator

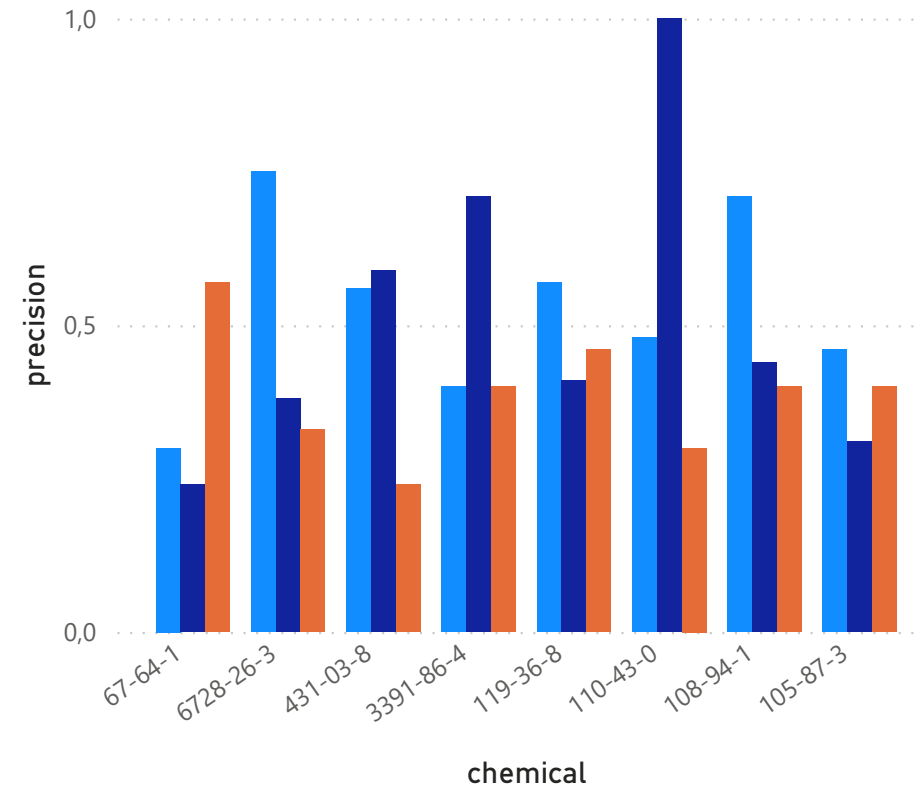

dataset A. gambiae D. melanogaster H. saltator

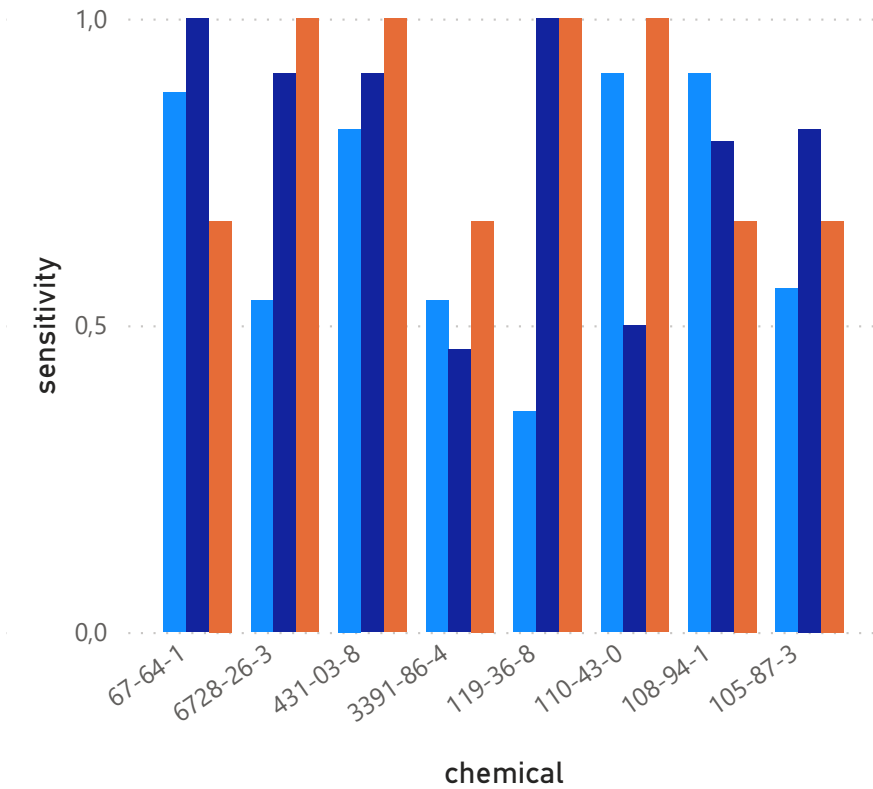

Supplement: s1 [file s1]
